# Supplementary material
Source: publisher figshare collection journal article supplement (https://springernature.figshare.com/ndownloader/files/18735524)
Supplement: Supplementary file 1 [file 18735524]

42.670204 142.015747 35.451 2018 9 6 3 7 58.540 6.7
42.770184 142.009109 28.055 2018 9 6 3 9 51.850 0.0
42.679745 142.031067 29.668 2018 9 6 3 10 20.540 4.3
42.589134 141.981049 25.288 2018 9 6 3 11 8.540 4.5
42.792637 142.002792 31.787 2018 9 6 3 11 14.790 3.8
42.623150 142.001434 32.731 2018 9 6 3 11 37.730 4.0
42.704010 142.000153 31.090 2018 9 6 3 12 23.070 0.0
42.632992 142.027908 32.435 2018 9 6 3 12 44.290 3.8
42.798592 142.016617 27.723 2018 9 6 3 13 34.760 2.8
42.692196 141.999908 26.835 2018 9 6 3 13 46.070 3.9
42.742348 142.024612 25.098 2018 9 6 3 14 31.740 2.9
42.664848 141.992737 19.472 2018 9 6 3 15 0.940 3.6
42.654331 142.017075 28.763 2018 9 6 3 16 19.360 3.1
42.629307 141.995636 26.461 2018 9 6 3 17 8.780 4.7
42.753284 142.015305 28.887 2018 9 6 3 17 39.740 0.0
42.614624 141.983551 26.222 2018 9 6 3 18 53.180 2.8
42.666542 142.016174 43.932 2018 9 6 3 19 49.930 4.0
42.588066 141.980103 30.026 2018 9 6 3 20 10.200 5.5
42.669022 142.011215 27.330 2018 9 6 3 22 4.010 3.2
42.606747 141.972061 25.620 2018 9 6 3 22 44.310 3.1
42.626308 141.999054 26.465 2018 9 6 3 23 12.180 3.2
42.809212 142.001175 30.201 2018 9 6 3 23 48.690 4.8
42.653259 142.019913 24.952 2018 9 6 3 24 54.460 3.3
42.687462 142.024429 29.974 2018 9 6 3 25 35.900 4.0
42.599377 141.979950 27.189 2018 9 6 3 26 2.460 3.8
42.636398 141.985168 24.819 2018 9 6 3 26 38.740 3.6
42.717403 142.007553 27.753 2018 9 6 3 27 27.000 2.5
42.624237 141.992020 22.221 2018 9 6 3 27 59.100 2.2
42.582127 141.974686 24.881 2018 9 6 3 28 35.100 2.3
42.795849 142.011047 27.242 2018 9 6 3 29 6.880 1.9
42.650436 142.028259 36.286 2018 9 6 3 29 25.980 2.3
42.713356 142.006897 27.106 2018 9 6 3 29 53.720 2.5
42.615978 141.991852 30.082 2018 9 6 3 30 8.520 2.6
42.677559 142.016296 29.130 2018 9 6 3 30 59.460 2.4
42.718849 142.016785 30.020 2018 9 6 3 31 14.250 2.8
42.687386 142.004288 26.395 2018 9 6 3 31 22.930 3.1
42.738029 142.020218 29.260 2018 9 6 3 32 35.820 3.1
42.735821 142.022705 28.845 2018 9 6 3 32 51.850 4.6
42.699654 142.025909 33.055 2018 9 6 3 33 7.220 4.1
42.714100 142.002319 26.477 2018 9 6 3 35 4.380 2.7
42.696743 142.007416 28.432 2018 9 6 3 35 46.730 2.4
42.693493 141.998856 32.261 2018 9 6 3 35 55.950 3.5
42.643059 142.033325 32.414 2018 9 6 3 37 34.930 1.7
42.678673 142.019241 26.442 2018 9 6 3 37 38.610 2.2
42.592197 141.970993 25.988 2018 9 6 3 38 1.160 2.7
42.667027 141.977875 36.123 2018 9 6 3 38 6.820 2.9
42.672585 142.010590 27.554 2018 9 6 3 38 34.460 3.1
42.613178 141.986862 30.107 2018 9 6 3 39 32.330 2.3
42.731995 142.013382 28.125 2018 9 6 3 40 2.810 1.8
42.596004 141.982010 27.411 2018 9 6 3 40 27.770 2.4
42.584457 142.007996 26.786 2018 9 6 3 40 48.940 2.5
42.611973 141.985626 30.571 2018 9 6 3 40 52.810 2.8
42.578186 142.049728 17.887 2018 9 6 3 41 45.130 2.4
42.731503 142.009476 27.939 2018 9 6 3 42 19.680 2.4
42.716846 141.997757 27.717 2018 9 6 3 42 47.320 2.3
42.742653 142.033386 30.266 2018 9 6 3 43 6.010 2.2
42.795799 142.003296 29.657 2018 9 6 3 43 43.510 2.5
42.723640 142.011765 28.785 2018 9 6 3 44 13.410 2.7
42.619068 141.992126 27.729 2018 9 6 3 44 54.170 2.0
42.803219 142.005630 26.117 2018 9 6 3 45 8.980 2.0
42.735291 142.010284 27.955 2018 9 6 3 45 34.870 2.5
42.586609 141.984238 28.894 2018 9 6 3 46 13.050 2.3
42.676632 141.929276 19.549 2018 9 6 3 46 30.010 2.8
42.713638 142.012634 32.006 2018 9 6 3 47 17.800 2.5
42.619591 142.022430 27.935 2018 9 6 3 47 56.500 2.3
42.595478 141.904709 19.746 2018 9 6 3 48 28.200 2.3
42.653931 142.020004 29.431 2018 9 6 3 49 10.940 2.6
42.692150 142.006790 27.371 2018 9 6 3 50 7.950 1.9
42.746490 142.011734 32.898 2018 9 6 3 52 20.140 2.3
42.721321 141.950027 28.627 2018 9 6 3 52 58.260 2.1
42.589653 141.999435 30.033 2018 9 6 3 53 9.020 1.9
42.723324 142.009750 29.000 2018 9 6 3 53 57.510 2.3
42.654018 142.024368 30.331 2018 9 6 3 54 10.300 3.0
42.608776 142.000610 30.067 2018 9 6 3 54 39.090 3.0
42.627384 142.010086 27.745 2018 9 6 3 55 51.980 2.1
42.697807 142.002518 30.112 2018 9 6 3 56 25.360 3.6
42.580029 141.970108 24.369 2018 9 6 3 58 52.190 2.6
42.699688 142.001923 27.671 2018 9 6 3 59 37.000 2.3
42.820873 142.037125 26.563 2018 9 6 4 0 28.880 1.8
42.705151 142.010147 27.123 2018 9 6 4 0 46.290 2.0
42.650360 142.019012 28.673 2018 9 6 4 1 5.340 2.2
42.713673 142.003967 27.533 2018 9 6 4 1 40.010 2.6
42.636131 141.995819 26.110 2018 9 6 4 2 50.850 2.0
42.728096 142.004135 26.252 2018 9 6 4 3 37.510 2.8
42.709839 142.006073 29.216 2018 9 6 4 4 28.860 2.2
42.638424 141.948074 16.419 2018 9 6 4 5 2.680 2.3
42.675060 142.024872 31.236 2018 9 6 4 6 13.480 1.7
42.625877 142.031937 30.510 2018 9 6 4 6 29.140 3.2
42.599129 141.995239 27.920 2018 9 6 4 7 1.130 3.0
42.600929 141.990112 29.110 2018 9 6 4 7 32.260 2.6
42.625324 142.018234 28.773 2018 9 6 4 8 57.060 2.6
42.614887 142.001144 33.183 2018 9 6 4 9 55.920 2.9
42.673019 142.017319 30.516 2018 9 6 4 10 46.880 4.7
42.692749 142.006393 30.212 2018 9 6 4 12 36.520 3.1
42.656422 142.019485 31.984 2018 9 6 4 13 19.190 2.9
42.774960 142.020050 28.799 2018 9 6 4 14 16.750 3.0
42.673008 141.992676 35.923 2018 9 6 4 15 16.390 3.0
42.733044 142.014465 27.479 2018 9 6 4 15 40.430 3.0
42.743237 142.016434 30.710 2018 9 6 4 16 32.060 2.6
42.764954 142.029099 36.130 2018 9 6 4 16 40.160 2.5
42.649555 142.021896 29.897 2018 9 6 4 17 46.530 2.4
42.778179 142.010803 27.425 2018 9 6 4 18 4.140 2.7
42.606129 141.995895 30.774 2018 9 6 4 18 14.540 3.0
42.610638 142.004578 29.628 2018 9 6 4 19 27.060 2.2
42.688049 142.004669 27.512 2018 9 6 4 19 33.710 2.7
42.662102 142.022263 38.601 2018 9 6 4 19 47.810 3.1
42.667686 142.022125 31.897 2018 9 6 4 19 59.640 3.1
42.593864 141.995316 27.749 2018 9 6 4 20 38.280 2.6
42.666302 142.008194 32.271 2018 9 6 4 21 24.840 2.2
42.647648 142.021469 26.496 2018 9 6 4 22 59.260 1.9
42.713402 142.008347 29.628 2018 9 6 4 23 41.780 2.1
42.687317 142.007645 28.816 2018 9 6 4 24 2.610 2.8
42.708324 142.016617 29.491 2018 9 6 4 25 36.570 1.8
42.600758 142.005585 29.715 2018 9 6 4 25 46.430 2.3
42.588715 142.000183 34.416 2018 9 6 4 26 38.440 3.0
42.641258 142.011505 28.569 2018 9 6 4 27 43.980 2.2
42.611164 141.997696 29.660 2018 9 6 4 28 23.750 2.1
42.745586 142.011612 25.564 2018 9 6 4 30 22.880 1.9
42.635822 142.026260 35.005 2018 9 6 4 30 24.670 2.0
42.661472 141.996307 25.398 2018 9 6 4 31 49.540 2.2
42.667564 141.992493 26.282 2018 9 6 4 32 32.790 3.0
42.639767 142.023849 25.577 2018 9 6 4 32 54.640 2.8
42.622402 142.025452 28.086 2018 9 6 4 33 29.600 2.3
42.776672 142.007782 30.941 2018 9 6 4 34 20.810 2.5
42.560959 142.080399 34.394 2018 9 6 4 35 24.390 1.8
42.613655 142.015152 29.307 2018 9 6 4 35 50.500 1.9
42.628811 141.982742 40.982 2018 9 6 4 36 12.140 2.5
42.628330 142.017700 31.481 2018 9 6 4 37 44.800 2.7
42.638222 142.023666 33.273 2018 9 6 4 39 4.300 3.9
42.684135 142.012634 27.771 2018 9 6 4 41 40.460 1.9
42.637012 142.029343 32.155 2018 9 6 4 42 37.450 3.6
42.602112 141.904251 15.839 2018 9 6 4 43 49.040 2.6
42.789360 142.005096 28.683 2018 9 6 4 44 10.240 2.4
42.601170 142.023102 32.189 2018 9 6 4 44 56.210 2.1
42.665489 141.922699 16.237 2018 9 6 4 46 23.920 1.4
42.631107 142.021820 31.537 2018 9 6 4 47 10.390 2.1
42.644085 141.930161 21.687 2018 9 6 4 47 57.810 2.0
42.721596 142.001419 31.381 2018 9 6 4 48 37.620 1.9
42.661568 142.006027 26.948 2018 9 6 4 49 32.490 2.4
42.721821 142.014526 31.849 2018 9 6 4 49 50.990 2.3
42.646198 142.032089 35.129 2018 9 6 4 50 30.610 2.8
42.604748 141.993698 30.940 2018 9 6 4 52 9.520 2.7
42.792953 142.021286 29.978 2018 9 6 4 54 27.460 1.2
42.604580 141.992004 27.644 2018 9 6 4 55 7.660 2.6
42.688080 142.002426 27.496 2018 9 6 4 55 44.860 2.3
42.614006 142.014572 31.675 2018 9 6 4 56 35.800 1.9
42.603218 141.978683 30.323 2018 9 6 4 57 12.110 3.2
42.627968 142.023361 31.973 2018 9 6 4 58 39.230 2.9
42.607174 141.992050 31.737 2018 9 6 4 59 56.120 1.4
42.640903 142.039642 28.941 2018 9 6 5 0 13.060 1.3
42.627316 142.021652 29.509 2018 9 6 5 0 57.080 0.0
42.697460 142.012589 27.973 2018 9 6 5 2 0.580 1.6
42.675400 142.022415 29.693 2018 9 6 5 2 23.230 1.5
42.617363 142.012527 32.147 2018 9 6 5 3 27.340 2.9
42.628426 142.020264 29.594 2018 9 6 5 4 39.910 2.0
42.759319 142.005234 28.650 2018 9 6 5 5 51.380 1.4
42.652653 141.958176 28.559 2018 9 6 5 6 10.160 1.2
42.553024 141.971909 16.742 2018 9 6 5 6 45.010 1.3
42.715759 142.012787 29.752 2018 9 6 5 8 15.730 1.6
42.627079 142.019974 31.509 2018 9 6 5 8 59.550 3.0
42.613457 141.994797 22.293 2018 9 6 5 9 28.310 3.0
42.581024 141.981659 28.619 2018 9 6 5 10 22.250 1.9
42.612980 142.007736 30.864 2018 9 6 5 10 40.210 3.1
42.638855 142.012299 29.344 2018 9 6 5 12 16.970 1.9
42.813126 141.999969 31.664 2018 9 6 5 12 55.810 3.3
42.592255 141.980927 25.979 2018 9 6 5 14 39.400 2.1
42.675037 142.016403 27.833 2018 9 6 5 15 14.970 1.8
42.664360 142.029175 28.425 2018 9 6 5 16 31.280 1.7
42.599815 142.000595 30.556 2018 9 6 5 16 51.490 2.6
42.667313 142.013702 27.168 2018 9 6 5 18 11.550 2.1
42.591908 141.998993 29.007 2018 9 6 5 18 42.700 1.4
42.612858 142.019608 30.998 2018 9 6 5 19 42.120 2.4
42.608406 142.010101 32.862 2018 9 6 5 20 47.380 4.1
42.598358 142.023300 31.009 2018 9 6 5 21 36.010 3.3
42.638268 142.014435 29.646 2018 9 6 5 24 33.410 2.9
42.672409 142.004852 25.703 2018 9 6 5 25 18.960 2.4
42.607040 141.995178 32.219 2018 9 6 5 25 58.430 2.8
42.673344 142.029037 29.268 2018 9 6 5 27 41.100 0.0
42.607460 142.010025 31.125 2018 9 6 5 27 49.790 2.6
42.621819 142.031189 30.477 2018 9 6 5 28 36.750 2.0
42.624634 142.001328 26.615 2018 9 6 5 30 6.560 1.6
42.600967 141.984222 28.968 2018 9 6 5 31 35.580 2.6
42.790157 142.033569 25.227 2018 9 6 5 32 39.400 1.5
42.625225 141.910446 16.824 2018 9 6 5 33 13.920 1.3
42.820332 142.015884 28.093 2018 9 6 5 33 33.340 1.5
42.683945 142.026474 32.304 2018 9 6 5 33 48.330 1.0
42.603870 141.968887 27.766 2018 9 6 5 34 10.270 1.7
42.621624 141.986465 23.833 2018 9 6 5 35 12.540 2.4
42.672245 141.999695 26.667 2018 9 6 5 35 58.180 2.8
42.648746 141.915802 15.494 2018 9 6 5 36 47.940 2.7
42.621712 142.044601 18.014 2018 9 6 5 37 52.370 1.7
42.599468 141.969162 25.746 2018 9 6 5 37 55.140 2.5
42.718754 142.004684 27.985 2018 9 6 5 40 19.050 1.9
42.665680 141.996567 24.514 2018 9 6 5 41 4.060 2.0
42.610828 142.006165 31.372 2018 9 6 5 42 17.240 2.4
42.588547 141.963898 25.881 2018 9 6 5 43 3.330 2.2
42.711487 142.015320 29.629 2018 9 6 5 44 10.390 2.8
42.706955 142.036041 25.613 2018 9 6 5 45 55.920 1.2
42.730797 141.972214 19.235 2018 9 6 5 47 29.200 1.5
42.602959 141.973099 29.402 2018 9 6 5 48 54.760 1.2
42.719067 142.004868 27.916 2018 9 6 5 50 25.860 2.0
42.630901 142.016891 29.785 2018 9 6 5 54 4.350 1.7
42.620777 141.993896 13.835 2018 9 6 5 56 56.790 1.1
42.683640 142.000504 27.023 2018 9 6 5 57 21.180 2.3
42.668270 142.015991 29.601 2018 9 6 5 57 59.180 2.0
42.707825 142.000351 29.192 2018 9 6 5 58 36.380 2.4
42.789871 142.005478 31.953 2018 9 6 5 59 44.330 1.5
42.769867 142.016693 34.104 2018 9 6 6 1 6.180 2.4
42.708992 141.999573 31.243 2018 9 6 6 1 13.190 3.0
42.677216 142.018768 29.871 2018 9 6 6 4 31.250 4.4
42.663898 142.023270 27.726 2018 9 6 6 6 38.670 3.5
42.765362 142.023315 29.980 2018 9 6 6 8 47.190 1.5
42.682571 142.016129 29.843 2018 9 6 6 9 34.580 2.0
42.689308 141.993835 34.314 2018 9 6 6 10 40.850 1.0
42.664093 142.031464 34.920 2018 9 6 6 11 29.230 5.4
42.657230 142.020538 28.056 2018 9 6 6 16 27.930 2.2
42.585079 141.968384 25.042 2018 9 6 6 18 17.190 1.5
42.802502 142.023682 32.137 2018 9 6 6 18 30.480 1.6
42.735493 142.017960 28.745 2018 9 6 6 19 35.010 1.7
42.646477 142.022842 30.821 2018 9 6 6 19 44.800 1.7
42.614998 142.006348 33.039 2018 9 6 6 20 54.960 1.4
42.710270 142.010681 27.805 2018 9 6 6 22 27.010 1.4
42.586029 141.960846 25.719 2018 9 6 6 25 8.090 2.1
42.686714 142.035721 34.650 2018 9 6 6 25 27.980 1.5
42.670216 142.029617 31.545 2018 9 6 6 26 5.420 2.5
42.718121 142.009384 30.504 2018 9 6 6 28 5.910 1.5
42.627007 142.010864 30.173 2018 9 6 6 29 44.110 2.4
42.564816 142.000397 32.195 2018 9 6 6 29 55.200 2.3
42.602093 141.970612 28.097 2018 9 6 6 30 23.820 2.9
42.616100 142.010559 33.071 2018 9 6 6 32 11.880 3.5
42.801651 142.005875 31.540 2018 9 6 6 32 32.370 3.9
42.630703 142.014328 27.464 2018 9 6 6 33 40.460 2.6
42.611694 141.997879 32.910 2018 9 6 6 35 21.450 1.9
42.638336 142.040070 35.909 2018 9 6 6 35 40.780 1.3
42.621880 141.991135 28.353 2018 9 6 6 36 48.720 1.9
42.745407 142.005051 30.905 2018 9 6 6 36 58.870 1.7
42.696796 142.020050 26.918 2018 9 6 6 37 30.110 1.8
42.792530 142.035690 28.771 2018 9 6 6 37 53.610 2.1
42.733711 141.998184 26.887 2018 9 6 6 39 41.580 2.7
42.633343 141.960663 7.818 2018 9 6 6 40 59.810 0.0
42.671642 141.998764 26.482 2018 9 6 6 42 3.180 2.3
42.609043 141.913635 24.468 2018 9 6 6 42 19.210 2.3
42.703037 142.006226 30.708 2018 9 6 6 42 49.910 2.2
42.635044 142.030746 32.471 2018 9 6 6 43 46.750 1.3
42.675861 142.009583 26.842 2018 9 6 6 45 18.950 1.6
42.590504 141.971298 24.100 2018 9 6 6 45 51.780 1.3
42.711258 141.865051 14.437 2018 9 6 6 46 38.660 1.6
42.740944 142.024857 25.362 2018 9 6 6 46 53.810 1.8
42.617916 141.990692 27.076 2018 9 6 6 48 12.980 2.7
42.708591 141.928497 14.527 2018 9 6 6 49 9.570 1.5
42.716290 141.943451 16.181 2018 9 6 6 50 28.930 1.3
42.746033 141.996658 29.228 2018 9 6 6 51 1.810 2.7
42.675407 141.982895 22.005 2018 9 6 6 52 42.330 1.2
42.609577 142.012375 31.835 2018 9 6 6 53 22.350 3.8
42.632385 142.037903 34.346 2018 9 6 6 55 11.570 1.2
42.676136 142.014938 35.233 2018 9 6 6 56 47.710 2.1
42.674324 142.005249 24.904 2018 9 6 6 57 13.310 2.1
42.634178 142.028519 32.868 2018 9 6 6 57 32.850 3.7
42.687637 142.011917 26.119 2018 9 6 6 57 44.660 3.7
42.807793 142.008820 29.296 2018 9 6 6 59 19.710 2.1
42.612576 141.921387 33.787 2018 9 6 6 59 29.900 2.5
42.756542 142.023544 32.478 2018 9 6 7 0 1.650 2.1
42.728798 142.009720 28.604 2018 9 6 7 0 39.440 1.8
42.698441 142.036041 28.326 2018 9 6 7 2 22.010 1.5
42.753464 142.017548 29.085 2018 9 6 7 4 24.750 1.6
42.763096 142.040176 30.192 2018 9 6 7 4 29.420 2.4
42.718857 142.004654 27.584 2018 9 6 7 5 42.670 2.3
42.660904 142.008774 26.038 2018 9 6 7 6 42.730 1.9
42.633350 142.029694 31.438 2018 9 6 7 7 13.750 3.2
42.654480 142.018311 33.646 2018 9 6 7 8 19.550 3.5
42.683830 141.993530 25.963 2018 9 6 7 11 3.930 1.4
42.635201 141.923874 13.960 2018 9 6 7 11 18.320 2.0
42.773312 142.023178 31.611 2018 9 6 7 11 37.060 2.6
42.700321 142.030090 31.268 2018 9 6 7 12 20.290 2.0
42.642559 142.019760 24.627 2018 9 6 7 13 25.500 0.0
42.675335 142.011047 28.985 2018 9 6 7 13 51.450 1.7
42.602371 141.932068 13.120 2018 9 6 7 17 19.630 0.0
42.739971 142.029999 30.004 2018 9 6 7 17 29.190 2.0
42.595230 142.043381 24.538 2018 9 6 7 18 4.020 1.4
42.636829 142.040329 24.922 2018 9 6 7 18 42.420 1.8
42.722603 142.006393 28.529 2018 9 6 7 19 36.730 3.3
42.653156 142.018112 28.882 2018 9 6 7 20 2.170 3.5
42.688686 142.010712 29.392 2018 9 6 7 21 46.010 1.8
42.609852 142.001541 28.481 2018 9 6 7 23 9.130 2.2
42.801941 142.027725 35.370 2018 9 6 7 24 20.370 1.4
42.523746 141.945602 18.416 2018 9 6 7 25 54.150 1.4
42.594604 142.023056 31.054 2018 9 6 7 26 56.700 1.5
42.620724 142.034119 32.542 2018 9 6 7 27 1.230 1.9
42.715221 142.002869 27.130 2018 9 6 7 27 21.710 1.9
42.686771 142.029205 32.354 2018 9 6 7 27 43.160 2.0
42.662174 142.080200 21.541 2018 9 6 7 29 28.830 1.3
42.748070 142.011612 31.940 2018 9 6 7 29 47.150 3.6
42.652317 142.024551 30.088 2018 9 6 7 32 23.500 2.7
42.668045 142.022736 29.130 2018 9 6 7 33 19.300 2.1
42.683125 142.010193 26.986 2018 9 6 7 33 56.610 2.5
42.808067 142.003296 29.482 2018 9 6 7 35 47.310 2.0
42.624401 141.984467 25.229 2018 9 6 7 36 2.770 3.2
42.695969 142.012527 30.626 2018 9 6 7 39 42.510 2.0
42.704548 142.013336 30.265 2018 9 6 7 40 19.310 1.8
42.562046 141.959000 0.652 2018 9 6 7 40 53.750 1.4
42.756771 142.032944 28.830 2018 9 6 7 41 53.510 1.9
42.648403 141.926804 16.350 2018 9 6 7 43 6.400 1.9
42.753120 142.019302 28.020 2018 9 6 7 43 45.080 1.3
42.668530 142.034775 33.401 2018 9 6 7 44 9.380 3.4
42.802025 142.013947 31.886 2018 9 6 7 45 50.670 3.9
42.680157 142.010864 28.552 2018 9 6 7 48 35.910 2.3
42.670338 142.018112 29.949 2018 9 6 7 49 39.440 2.3
42.727974 142.010803 28.859 2018 9 6 7 50 15.100 1.5
42.672443 142.008453 28.121 2018 9 6 7 50 39.420 2.2
42.719894 142.012329 28.639 2018 9 6 7 51 41.020 2.8
42.755939 142.045822 34.910 2018 9 6 7 52 13.340 1.5
42.669338 141.998581 26.318 2018 9 6 7 55 25.880 2.4
42.606224 141.995636 31.408 2018 9 6 7 56 8.520 2.1
42.701077 142.001312 28.072 2018 9 6 7 57 13.550 2.6
42.672131 142.021759 28.404 2018 9 6 7 57 36.680 2.9
42.747543 142.007202 28.854 2018 9 6 7 59 5.890 1.5
42.600140 141.996506 28.530 2018 9 6 7 59 35.690 2.2
42.702507 142.021957 33.330 2018 9 6 8 1 24.730 1.2
42.640491 142.031448 28.253 2018 9 6 8 2 21.150 1.2
42.562992 142.079681 22.844 2018 9 6 8 3 32.550 1.6
42.601173 142.018433 29.747 2018 9 6 8 4 12.630 1.6
42.639355 142.017151 28.565 2018 9 6 8 6 55.450 2.2
42.564873 142.081848 33.405 2018 9 6 8 7 5.200 2.3
42.736729 142.007324 27.126 2018 9 6 8 9 52.280 2.3
42.669563 142.020752 29.108 2018 9 6 8 11 26.590 2.0
42.840725 141.997192 21.049 2018 9 6 8 12 0.020 1.0
42.654106 142.027313 28.825 2018 9 6 8 13 14.450 2.2
42.736443 141.999771 22.602 2018 9 6 8 13 56.930 1.5
42.634972 141.995880 27.161 2018 9 6 8 15 18.860 3.3
42.617203 141.987305 19.664 2018 9 6 8 15 49.940 2.6
42.709877 142.112991 31.333 2018 9 6 8 21 5.840 1.4
42.644733 142.006866 23.635 2018 9 6 8 23 24.530 1.3
42.648041 142.030991 29.806 2018 9 6 8 23 46.120 1.5
42.805847 142.025070 29.083 2018 9 6 8 25 16.860 2.5
42.781235 142.011719 29.851 2018 9 6 8 27 42.900 1.8
42.656204 142.009094 27.729 2018 9 6 8 30 39.280 1.1
42.619598 142.013000 30.755 2018 9 6 8 30 57.270 2.4
42.755817 142.019226 28.929 2018 9 6 8 31 43.930 2.2
42.712421 141.994827 27.771 2018 9 6 8 33 0.220 1.9
42.607445 141.998840 27.525 2018 9 6 8 33 18.650 2.0
42.705585 142.001877 32.263 2018 9 6 8 34 5.030 1.6
42.649853 142.020828 28.198 2018 9 6 8 36 12.240 2.5
42.739136 142.017288 27.009 2018 9 6 8 37 11.640 1.7
42.794216 142.042282 31.019 2018 9 6 8 37 30.230 3.4
42.749783 142.034668 32.927 2018 9 6 8 38 53.180 1.5
42.609589 141.981293 29.355 2018 9 6 8 39 55.970 1.4
42.647545 142.036545 30.055 2018 9 6 8 40 22.970 2.0
42.743999 142.020996 27.843 2018 9 6 8 41 38.020 2.3
42.610714 141.977036 30.341 2018 9 6 8 42 15.040 1.9
42.608692 142.008148 31.830 2018 9 6 8 42 30.820 3.5
42.580860 141.985336 25.523 2018 9 6 8 44 38.950 0.0
42.726910 142.022568 28.339 2018 9 6 8 45 22.180 1.9
42.633839 141.987610 23.034 2018 9 6 8 47 37.820 1.5
42.604439 142.007141 27.093 2018 9 6 8 48 8.620 1.2
42.684654 142.018158 28.864 2018 9 6 8 51 22.800 1.3
42.670151 142.000122 25.029 2018 9 6 8 52 53.250 2.1
42.712193 142.016907 26.594 2018 9 6 8 53 4.980 2.8
42.693687 142.041168 34.600 2018 9 6 8 55 9.110 1.1
42.719925 142.001022 32.210 2018 9 6 8 56 29.570 1.6
42.719177 141.998917 29.283 2018 9 6 8 57 19.050 2.3
42.700146 142.005585 28.502 2018 9 6 8 57 27.860 2.9
42.698002 142.004089 28.113 2018 9 6 9 0 22.290 1.5
42.639275 141.902985 24.254 2018 9 6 9 1 7.030 1.2
42.598042 141.971085 28.103 2018 9 6 9 1 39.080 2.5
42.602234 141.959625 12.924 2018 9 6 9 2 55.040 1.5
42.637283 142.029099 30.082 2018 9 6 9 3 25.860 1.2
42.677219 142.022522 31.333 2018 9 6 9 3 46.710 2.0
42.605534 142.013885 31.935 2018 9 6 9 4 57.230 3.3
42.604649 141.991653 29.894 2018 9 6 9 6 53.010 3.2
42.611088 142.002701 32.296 2018 9 6 9 6 59.270 3.1
42.756577 142.027084 26.765 2018 9 6 9 8 53.770 1.5
42.621304 142.009766 30.876 2018 9 6 9 9 9.670 1.7
42.682014 141.987305 26.773 2018 9 6 9 10 41.420 1.1
42.605942 142.011459 30.736 2018 9 6 9 11 59.440 1.9
42.777740 142.019424 27.512 2018 9 6 9 14 12.260 1.2
42.614067 141.998596 33.430 2018 9 6 9 16 39.380 1.4
42.686752 142.014175 29.947 2018 9 6 9 16 55.320 3.8
42.608952 141.986786 24.863 2018 9 6 9 19 37.160 2.8
42.697090 142.007858 27.804 2018 9 6 9 21 19.440 1.5
42.670444 142.016327 30.143 2018 9 6 9 22 13.590 2.7
42.588753 141.966324 25.794 2018 9 6 9 25 26.600 1.4
42.645454 142.001007 8.537 2018 9 6 9 26 23.580 0.8
42.657597 142.016495 27.265 2018 9 6 9 30 29.580 1.2
42.628147 142.042038 29.705 2018 9 6 9 32 24.890 1.5
42.565388 142.003952 31.289 2018 9 6 9 32 57.700 1.3
42.609623 142.013229 27.772 2018 9 6 9 33 39.940 1.5
42.620838 142.016129 24.133 2018 9 6 9 34 38.880 1.2
42.622692 142.021225 32.424 2018 9 6 9 35 32.430 1.1
42.652332 142.017609 29.892 2018 9 6 9 36 45.580 2.6
42.699821 141.952545 17.666 2018 9 6 9 38 0.530 1.3
42.684334 141.976166 32.273 2018 9 6 9 38 16.200 2.3
42.583103 141.967911 21.873 2018 9 6 9 39 49.680 1.2
42.712959 142.006088 28.054 2018 9 6 9 40 49.400 2.0
42.709648 142.000397 27.479 2018 9 6 9 41 39.010 1.5
42.715775 141.996964 30.150 2018 9 6 9 43 35.830 2.1
42.655296 142.011230 26.617 2018 9 6 9 45 35.210 1.2
42.610886 142.007629 31.907 2018 9 6 9 47 6.450 1.7
42.619495 142.030685 31.917 2018 9 6 9 48 29.590 1.1
42.713123 142.014084 25.704 2018 9 6 9 50 1.300 1.3
42.782330 141.959579 23.834 2018 9 6 9 52 43.330 1.6
42.728539 142.002441 23.195 2018 9 6 9 52 59.770 1.6
42.671021 142.031265 38.072 2018 9 6 9 54 20.900 0.9
42.610340 142.010162 32.155 2018 9 6 9 55 7.890 2.0
42.582455 141.998611 28.389 2018 9 6 9 55 40.320 1.2
42.594078 141.968384 28.289 2018 9 6 9 56 17.640 1.3
42.778271 142.018143 27.422 2018 9 6 9 57 49.080 1.6
42.667965 142.017181 30.067 2018 9 6 10 0 7.020 1.7
42.733265 142.028366 31.639 2018 9 6 10 0 25.980 2.2
42.714790 142.009155 29.130 2018 9 6 10 4 38.100 1.8
42.585930 141.962662 24.551 2018 9 6 10 7 18.460 2.0
42.653522 142.037277 35.388 2018 9 6 10 7 53.920 1.9
42.604073 142.002029 30.479 2018 9 6 10 8 19.220 2.5
42.625664 141.946518 14.846 2018 9 6 10 9 33.380 1.4
42.613285 141.998688 32.924 2018 9 6 10 9 52.230 2.5
42.606770 141.993942 31.865 2018 9 6 10 10 25.600 2.2
42.697102 141.971054 20.974 2018 9 6 10 13 32.890 1.6
42.563576 141.966995 21.483 2018 9 6 10 14 57.380 0.0
42.601742 142.010101 29.031 2018 9 6 10 15 0.280 2.6
42.709599 142.007507 28.163 2018 9 6 10 16 35.060 3.3
42.699799 142.011093 30.763 2018 9 6 10 19 12.830 1.8
42.726009 142.014557 26.775 2018 9 6 10 22 24.950 0.9
42.746193 142.011154 29.838 2018 9 6 10 23 53.140 2.3
42.596275 142.002518 29.961 2018 9 6 10 25 34.790 1.7
42.787350 142.039474 28.518 2018 9 6 10 26 6.000 1.9
42.800278 142.013168 29.881 2018 9 6 10 27 13.760 1.6
42.678497 142.028152 33.798 2018 9 6 10 27 45.770 1.3
42.661541 142.028503 31.987 2018 9 6 10 28 20.770 2.0
42.622910 141.998032 32.118 2018 9 6 10 28 34.250 2.1
42.610901 141.994553 35.866 2018 9 6 10 28 51.570 1.9
42.669575 142.023666 31.407 2018 9 6 10 29 2.730 2.3
42.635574 141.923462 16.681 2018 9 6 10 30 5.420 1.8
42.615349 142.034607 30.388 2018 9 6 10 30 50.730 2.0
42.604198 141.996872 30.888 2018 9 6 10 31 51.510 1.9
42.741287 142.006378 29.969 2018 9 6 10 35 54.490 1.6
42.605885 141.965439 30.669 2018 9 6 10 36 22.440 1.5
42.598606 141.967361 25.047 2018 9 6 10 37 36.310 1.7
42.832005 142.028442 33.221 2018 9 6 10 38 51.290 1.3
42.580029 141.957001 11.226 2018 9 6 10 40 49.710 0.9
42.572735 141.978928 3.925 2018 9 6 10 42 35.940 1.2
42.641457 142.026932 29.241 2018 9 6 10 43 30.480 1.8
42.607735 142.000092 27.219 2018 9 6 10 45 6.210 1.2
42.586609 142.016388 31.530 2018 9 6 10 47 5.840 1.9
42.723412 142.010681 29.464 2018 9 6 10 47 34.530 2.1
42.757942 141.949234 17.753 2018 9 6 10 50 17.840 1.6
42.623188 142.000137 32.936 2018 9 6 10 51 31.310 1.7
42.639626 142.022675 29.817 2018 9 6 10 51 58.610 1.6
42.681458 142.014160 29.226 2018 9 6 10 52 7.840 2.3
42.754425 141.944031 16.014 2018 9 6 10 53 34.210 1.2
42.787392 142.037354 29.272 2018 9 6 10 54 47.540 1.4
42.741341 142.021835 29.236 2018 9 6 10 57 28.180 1.9
42.753922 141.950897 16.684 2018 9 6 10 58 14.380 1.8
42.678417 142.012009 29.695 2018 9 6 10 58 26.130 3.3
42.586170 141.985031 26.585 2018 9 6 10 59 52.300 1.6
42.656189 142.027145 33.080 2018 9 6 11 0 48.850 1.8
42.778591 142.028229 28.738 2018 9 6 11 2 30.820 1.5
42.646099 142.038177 31.073 2018 9 6 11 3 31.370 1.8
42.802628 142.001312 33.171 2018 9 6 11 6 12.670 2.0
42.683937 141.991150 31.938 2018 9 6 11 7 21.620 3.7
42.758415 142.029236 30.412 2018 9 6 11 9 47.660 2.0
42.594688 142.055756 21.199 2018 9 6 11 11 59.540 1.1
42.631298 142.024475 34.058 2018 9 6 11 15 14.680 2.1
42.772224 142.023560 27.608 2018 9 6 11 16 58.930 1.1
42.600842 142.008667 27.073 2018 9 6 11 18 11.760 1.3
42.614388 142.021194 33.148 2018 9 6 11 19 38.740 3.3
42.686848 142.015869 31.879 2018 9 6 11 21 7.320 1.6
42.709507 142.025391 28.419 2018 9 6 11 22 31.760 2.2
42.614174 141.970871 29.818 2018 9 6 11 23 47.030 1.9
42.685627 142.022934 38.470 2018 9 6 11 24 43.840 2.1
42.604836 141.998856 32.183 2018 9 6 11 25 44.140 1.6
42.620125 142.017822 26.279 2018 9 6 11 26 28.710 1.0
42.704540 142.009094 28.385 2018 9 6 11 27 0.970 1.3
42.670311 141.991089 25.673 2018 9 6 11 28 45.730 2.2
42.590321 141.968201 26.385 2018 9 6 11 31 54.210 2.5
42.773365 142.022079 28.623 2018 9 6 11 32 46.280 1.6
42.679790 142.059174 29.027 2018 9 6 11 33 39.490 2.5
42.665615 141.991882 26.784 2018 9 6 11 34 56.710 1.4
42.668236 142.016388 29.913 2018 9 6 11 36 16.870 2.2
42.595619 142.002945 27.411 2018 9 6 11 37 20.710 2.3
42.713123 142.005630 25.365 2018 9 6 11 39 57.210 1.2
42.706375 141.993713 34.703 2018 9 6 11 41 36.300 3.0
42.614407 142.015274 30.256 2018 9 6 11 45 41.710 2.4
42.688183 142.004379 31.448 2018 9 6 11 47 4.620 3.0
42.679443 142.000931 25.388 2018 9 6 11 49 47.610 1.4
42.618912 142.016098 33.502 2018 9 6 11 51 20.650 1.5
42.688835 142.021454 32.904 2018 9 6 11 54 2.110 1.4
42.742355 142.014832 31.432 2018 9 6 11 55 6.870 1.9
42.785645 142.017654 27.259 2018 9 6 11 56 7.450 1.4
42.586983 141.971970 27.287 2018 9 6 11 57 49.320 2.4
42.718342 142.013901 31.384 2018 9 6 11 58 38.460 2.1
42.602470 142.003616 29.442 2018 9 6 11 59 7.040 2.5
42.689358 142.027405 27.658 2018 9 6 12 2 40.690 2.6
42.682117 142.001373 33.160 2018 9 6 12 6 33.490 1.7
42.776104 142.017303 30.345 2018 9 6 12 7 44.860 1.4
42.678635 142.004379 26.677 2018 9 6 12 8 6.410 2.1
42.558670 141.959274 24.840 2018 9 6 12 9 13.290 1.5
42.619270 142.020126 28.792 2018 9 6 12 11 6.590 1.2
42.586781 142.021439 30.902 2018 9 6 12 13 23.980 2.6
42.606903 141.982986 28.623 2018 9 6 12 14 9.490 3.6
42.640732 142.023010 32.323 2018 9 6 12 15 40.570 2.6
42.538815 141.962448 16.684 2018 9 6 12 19 39.120 1.4
42.793037 142.014175 34.200 2018 9 6 12 21 4.570 1.9
42.834103 142.007492 22.921 2018 9 6 12 23 4.530 1.3
42.753712 141.994736 38.311 2018 9 6 12 23 11.810 1.1
42.725834 142.023361 30.750 2018 9 6 12 27 33.980 1.6
42.636047 142.017548 31.999 2018 9 6 12 27 47.250 1.9
42.674835 141.993683 25.661 2018 9 6 12 27 59.680 3.2
42.611809 141.988663 29.231 2018 9 6 12 30 56.120 1.7
42.600346 142.017868 31.219 2018 9 6 12 31 16.660 2.7
42.674324 142.012573 33.379 2018 9 6 12 32 4.920 1.6
42.811783 142.051483 40.016 2018 9 6 12 33 5.320 1.5
42.596275 141.970856 26.637 2018 9 6 12 34 43.990 1.1
42.598652 141.997116 29.073 2018 9 6 12 40 42.010 1.9
42.619453 142.013336 28.524 2018 9 6 12 43 9.900 2.2
42.693489 142.019653 31.435 2018 9 6 12 43 48.080 1.8
42.678219 142.001678 25.982 2018 9 6 12 45 12.810 1.5
42.804028 142.043579 31.678 2018 9 6 12 47 14.400 1.7
42.588272 142.019547 28.573 2018 9 6 12 48 28.020 1.4
42.800709 142.022186 29.890 2018 9 6 12 48 39.350 2.2
42.756218 142.044281 27.651 2018 9 6 12 51 53.950 2.0
42.627018 142.009384 33.486 2018 9 6 12 52 8.200 1.7
42.609043 142.004532 30.640 2018 9 6 12 53 29.690 1.6
42.646015 142.021576 30.358 2018 9 6 12 59 59.970 2.1
42.612560 141.991592 29.061 2018 9 6 13 1 40.490 3.6
42.781029 142.018753 31.625 2018 9 6 13 6 24.610 2.1
42.642353 141.988602 39.819 2018 9 6 13 8 0.600 1.2
42.589218 141.970901 24.329 2018 9 6 13 9 37.570 1.5
42.667515 141.983734 23.540 2018 9 6 13 11 48.870 1.9
42.650200 142.021713 27.360 2018 9 6 13 12 37.210 1.8
42.654648 142.042786 32.483 2018 9 6 13 16 7.480 1.7
42.689999 142.027512 29.432 2018 9 6 13 19 25.830 1.4
42.746098 142.010391 28.604 2018 9 6 13 20 21.600 1.6
42.609413 142.000031 28.815 2018 9 6 13 20 58.610 1.8
42.620510 142.020035 32.495 2018 9 6 13 22 20.580 1.2
42.607922 141.997498 30.745 2018 9 6 13 24 31.140 1.8
42.667385 142.015518 28.719 2018 9 6 13 24 47.650 2.9
42.640884 142.002869 22.318 2018 9 6 13 26 41.390 1.4
42.794476 142.033829 27.802 2018 9 6 13 26 50.790 2.7
42.646675 142.031906 35.404 2018 9 6 13 28 29.830 2.5
42.687576 142.026489 32.439 2018 9 6 13 32 16.680 1.2
42.584438 141.978668 26.650 2018 9 6 13 34 8.830 3.0
42.612968 141.988434 26.961 2018 9 6 13 36 24.810 1.6
42.638756 142.035355 30.511 2018 9 6 13 38 21.700 1.6
42.599075 141.976028 27.059 2018 9 6 13 40 6.150 2.4
42.634613 142.024399 31.620 2018 9 6 13 45 5.770 2.2
42.675865 141.996964 24.650 2018 9 6 13 46 9.790 2.1
42.663754 142.035156 29.545 2018 9 6 13 46 45.320 1.4
42.582348 141.947693 4.763 2018 9 6 13 50 49.930 1.0
42.628143 142.022873 29.914 2018 9 6 13 51 29.970 2.3
42.607483 142.019348 30.213 2018 9 6 13 51 32.800 2.6
42.660706 142.002808 25.437 2018 9 6 13 55 0.160 1.5
42.586769 142.022339 30.751 2018 9 6 13 56 31.460 1.4
42.637489 142.021591 30.182 2018 9 6 13 57 12.650 2.4
42.612331 141.991196 28.370 2018 9 6 13 58 17.770 2.8
42.626171 141.916916 17.807 2018 9 6 14 1 19.950 1.6
42.694305 141.927795 19.200 2018 9 6 14 2 7.980 1.5
42.591858 141.990097 29.368 2018 9 6 14 3 57.610 4.3
42.737991 142.018341 29.086 2018 9 6 14 6 30.040 2.0
42.645390 142.014771 29.500 2018 9 6 14 10 12.570 1.4
42.672028 142.012009 32.185 2018 9 6 14 10 49.110 1.3
42.578377 141.984375 20.144 2018 9 6 14 11 45.980 1.1
42.676357 141.973602 24.489 2018 9 6 14 12 9.290 1.5
42.715931 142.011032 29.710 2018 9 6 14 15 8.360 1.5
42.556282 141.979218 17.598 2018 9 6 14 16 53.890 1.2
42.593189 142.012299 28.251 2018 9 6 14 18 17.680 1.8
42.646076 142.018753 26.703 2018 9 6 14 20 27.860 1.8
42.676159 142.017517 30.065 2018 9 6 14 21 39.540 1.4
42.623604 141.936050 15.246 2018 9 6 14 21 47.110 1.9
42.682999 142.081741 27.062 2018 9 6 14 26 43.700 1.6
42.604012 142.018021 25.790 2018 9 6 14 27 21.570 0.9
42.737812 142.002106 29.974 2018 9 6 14 35 12.090 1.5
42.655052 142.024933 26.478 2018 9 6 14 36 30.340 1.9
42.672016 142.016006 31.586 2018 9 6 14 39 0.670 1.9
42.781136 142.005997 33.820 2018 9 6 14 39 44.970 4.2
42.647785 142.037094 33.300 2018 9 6 14 43 54.110 1.5
42.840031 141.994385 24.258 2018 9 6 14 49 50.290 1.5
42.672890 141.983826 26.580 2018 9 6 14 51 22.910 3.2
42.793472 141.993301 29.964 2018 9 6 14 54 26.080 1.6
42.597195 141.970261 27.855 2018 9 6 14 58 35.410 1.7
42.720959 142.012878 28.095 2018 9 6 15 1 57.350 1.9
42.707691 142.019073 30.476 2018 9 6 15 2 50.850 1.4
42.675476 142.000931 26.025 2018 9 6 15 3 2.450 1.8
42.690418 142.000946 29.129 2018 9 6 15 4 13.640 1.3
42.701839 141.999237 26.158 2018 9 6 15 6 26.690 1.1
42.691132 142.006424 29.514 2018 9 6 15 9 9.000 1.5
42.598949 141.992203 29.059 2018 9 6 15 11 8.800 1.5
42.715717 142.013474 29.221 2018 9 6 15 11 25.700 2.0
42.672413 142.012741 32.338 2018 9 6 15 12 51.050 2.8
42.592178 141.961105 17.318 2018 9 6 15 17 56.300 1.2
42.598171 141.939453 18.000 2018 9 6 15 18 32.690 1.7
42.654919 142.024567 28.795 2018 9 6 15 22 28.780 2.1
42.760174 142.024094 27.948 2018 9 6 15 23 29.080 2.6
42.695858 142.020187 29.771 2018 9 6 15 26 23.100 1.1
42.614986 142.003632 33.511 2018 9 6 15 26 29.490 1.5
42.727249 142.006378 27.840 2018 9 6 15 27 51.050 1.3
42.646240 142.018188 27.941 2018 9 6 15 28 34.320 1.2
42.697365 142.024414 29.228 2018 9 6 15 30 14.500 2.3
42.641960 142.027695 29.459 2018 9 6 15 32 13.400 1.1
42.797249 142.057434 34.117 2018 9 6 15 32 45.450 1.3
42.795673 142.013596 31.577 2018 9 6 15 34 39.390 2.0
42.647579 142.028259 24.482 2018 9 6 15 35 12.380 2.1
42.806988 142.029465 27.324 2018 9 6 15 36 44.580 1.5
42.670639 142.027725 28.615 2018 9 6 15 39 55.120 2.3
42.792099 142.013779 26.548 2018 9 6 15 40 4.620 2.5
42.783634 142.031189 29.545 2018 9 6 15 42 31.340 1.8
42.750141 142.024323 30.202 2018 9 6 15 43 9.920 2.4
42.638767 141.918335 14.506 2018 9 6 15 48 34.140 1.5
42.566883 142.000748 20.981 2018 9 6 15 49 13.230 1.3
42.592747 142.005112 30.846 2018 9 6 15 52 0.260 3.4
42.733700 141.942825 15.645 2018 9 6 15 57 20.170 1.9
42.668266 142.023422 29.924 2018 9 6 16 0 39.170 2.2
42.668472 142.003967 26.644 2018 9 6 16 2 12.370 1.4
42.695091 142.013474 28.907 2018 9 6 16 7 52.050 0.6
42.596348 142.006256 29.002 2018 9 6 16 10 27.510 1.5
42.647057 142.029343 34.988 2018 9 6 16 11 13.090 2.9
42.715099 142.068558 20.084 2018 9 6 16 13 32.280 1.2
42.705521 142.013321 28.913 2018 9 6 16 15 19.350 1.1
42.768623 142.018250 30.684 2018 9 6 16 18 58.430 2.3
42.630527 141.948547 18.918 2018 9 6 16 21 5.700 1.4
42.708061 142.005280 27.484 2018 9 6 16 21 33.510 0.9
42.564209 141.919159 13.052 2018 9 6 16 23 57.650 1.6
42.641258 142.027786 36.967 2018 9 6 16 27 7.490 2.0
42.567368 141.986298 27.757 2018 9 6 16 27 20.910 1.7
42.707767 142.005386 32.168 2018 9 6 16 28 49.690 3.5
42.590813 142.020691 31.719 2018 9 6 16 32 15.090 1.4
42.597973 141.990295 29.399 2018 9 6 16 33 18.050 1.5
42.731903 141.952759 17.321 2018 9 6 16 34 14.220 1.3
42.708546 142.015594 30.328 2018 9 6 16 34 51.120 1.5
42.671364 142.009995 28.963 2018 9 6 16 39 37.780 2.0
42.660789 142.020340 29.283 2018 9 6 16 40 55.590 1.3
42.667122 142.007919 26.982 2018 9 6 16 41 29.470 1.1
42.708168 142.014725 30.916 2018 9 6 16 41 55.370 1.5
42.513371 141.891953 27.795 2018 9 6 16 42 16.350 1.6
42.584328 142.001007 33.087 2018 9 6 16 43 38.530 1.3
42.646877 142.013428 26.865 2018 9 6 16 44 5.250 1.6
42.707577 142.016281 29.571 2018 9 6 16 46 13.770 1.7
42.652088 142.003326 21.432 2018 9 6 16 47 36.130 1.2
42.676472 142.017563 30.312 2018 9 6 16 48 1.160 1.8
42.722897 142.011932 31.999 2018 9 6 16 49 5.810 1.3
42.696579 142.012192 30.150 2018 9 6 16 51 53.280 1.6
42.684464 142.000046 31.277 2018 9 6 16 53 23.790 4.4
42.814217 142.007797 27.326 2018 9 6 16 55 49.650 2.0
42.629978 142.031403 33.430 2018 9 6 16 59 42.870 2.6
42.668743 142.034546 30.783 2018 9 6 17 2 38.240 1.1
42.700630 142.025681 30.365 2018 9 6 17 4 3.400 1.0
42.613140 142.013229 30.338 2018 9 6 17 6 31.540 1.4
42.649841 141.974411 24.152 2018 9 6 17 10 11.720 1.6
42.603916 142.004684 30.965 2018 9 6 17 11 34.420 2.6
42.734730 142.019333 29.298 2018 9 6 17 16 14.660 1.2
42.632370 141.992508 29.719 2018 9 6 17 16 31.360 1.6
42.665043 142.027908 36.878 2018 9 6 17 17 45.900 2.0
42.705612 142.015274 29.814 2018 9 6 17 27 29.000 2.2
42.648502 141.923035 12.968 2018 9 6 17 29 16.820 1.6
42.668659 142.020691 31.821 2018 9 6 17 33 6.760 1.5
42.596264 142.003143 28.927 2018 9 6 17 33 15.520 2.2
42.666924 141.997147 23.977 2018 9 6 17 34 3.760 1.4
42.754143 141.912155 17.215 2018 9 6 17 36 35.100 1.3
42.599308 141.995697 28.826 2018 9 6 17 37 29.160 1.3
42.636402 141.987823 16.309 2018 9 6 17 38 51.960 0.8
42.640942 142.022141 29.771 2018 9 6 17 41 28.500 1.8
42.829441 142.014908 26.190 2018 9 6 17 42 43.080 1.3
42.690689 142.013046 34.428 2018 9 6 17 44 4.440 1.1
42.590107 141.995529 24.357 2018 9 6 17 47 9.160 0.8
42.687164 142.050751 31.209 2018 9 6 17 47 58.600 1.4
42.695580 142.015457 29.961 2018 9 6 17 48 14.000 2.1
42.658951 142.039169 27.695 2018 9 6 17 50 2.200 1.0
42.693905 142.014847 31.709 2018 9 6 17 51 14.920 1.1
42.599586 141.995407 27.458 2018 9 6 17 51 30.600 1.5
42.619843 142.015839 32.699 2018 9 6 17 52 8.860 1.3
42.689224 142.036469 31.055 2018 9 6 17 52 31.120 1.3
42.809139 142.032166 30.734 2018 9 6 17 53 16.040 1.8
42.720459 142.009766 29.969 2018 9 6 17 53 48.940 1.5
42.647846 141.924606 17.517 2018 9 6 17 54 43.240 1.4
42.596333 142.005173 30.140 2018 9 6 17 59 51.640 2.2
42.793209 142.010513 32.506 2018 9 6 18 0 45.560 3.2
42.643696 142.006271 28.157 2018 9 6 18 1 37.560 2.4
42.692074 141.993439 25.999 2018 9 6 18 2 6.000 2.0
42.645626 142.033707 32.774 2018 9 6 18 2 46.640 1.5
42.680561 142.015396 29.863 2018 9 6 18 3 53.200 2.0
42.704540 142.021881 29.005 2018 9 6 18 5 35.680 1.2
42.604187 141.973450 30.269 2018 9 6 18 7 50.560 1.1
42.762165 142.023544 29.899 2018 9 6 18 8 7.080 1.7
42.617954 142.012360 33.966 2018 9 6 18 10 1.500 1.2
42.785175 141.976761 29.132 2018 9 6 18 10 39.680 1.2
42.674713 142.011169 26.215 2018 9 6 18 11 45.800 1.2
42.726269 142.010590 29.143 2018 9 6 18 12 26.400 1.5
42.606594 141.985306 29.735 2018 9 6 18 12 30.040 1.7
42.687038 142.019409 27.926 2018 9 6 18 15 14.240 0.7
42.648415 141.933319 21.922 2018 9 6 18 15 21.600 1.4
42.584827 142.030594 30.275 2018 9 6 18 16 36.640 1.2
42.583042 141.997223 21.529 2018 9 6 18 17 54.880 1.2
42.678204 142.012405 30.350 2018 9 6 18 20 6.160 1.2
42.732864 142.002060 24.162 2018 9 6 18 20 41.320 0.6
42.662838 142.014267 28.828 2018 9 6 18 22 30.760 1.6
42.716309 142.011307 28.814 2018 9 6 18 25 7.240 2.0
42.802979 142.009857 28.871 2018 9 6 18 25 56.760 1.7
42.604095 142.014221 30.502 2018 9 6 18 29 33.520 1.7
42.677429 142.050812 34.819 2018 9 6 18 33 13.880 1.1
42.685665 142.008179 31.822 2018 9 6 18 33 54.220 3.2
42.676281 142.025391 29.535 2018 9 6 18 37 28.160 1.5
42.606956 141.994858 29.445 2018 9 6 18 39 31.980 1.5
42.702499 142.005783 32.708 2018 9 6 18 41 47.260 0.8
42.794582 142.007401 29.936 2018 9 6 18 44 5.120 1.1
42.643398 142.010681 29.027 2018 9 6 18 46 12.640 1.2
42.700237 142.004913 30.710 2018 9 6 18 46 19.560 2.0
42.708622 142.015884 28.983 2018 9 6 18 48 37.280 2.0
42.618664 141.991882 22.283 2018 9 6 18 50 0.400 1.3
42.699390 142.013596 30.073 2018 9 6 18 50 12.440 1.5
42.611641 142.019852 32.123 2018 9 6 18 56 12.280 1.2
42.667038 142.013260 29.153 2018 9 6 18 57 0.120 2.5
42.606834 142.014313 30.055 2018 9 6 18 57 56.880 1.8
42.633541 142.011871 29.655 2018 9 6 19 0 23.000 1.6
42.676922 142.002823 28.517 2018 9 6 19 1 16.600 1.8
42.706730 141.994827 28.907 2018 9 6 19 2 48.560 1.3
42.635052 142.020645 30.255 2018 9 6 19 3 55.000 2.6
42.711479 142.019180 29.094 2018 9 6 19 7 8.200 1.2
42.659294 142.029175 32.016 2018 9 6 19 8 48.500 1.6
42.599163 142.015488 30.991 2018 9 6 19 9 38.040 0.8
42.749680 141.998688 27.864 2018 9 6 19 10 9.680 1.2
42.646595 142.028885 35.378 2018 9 6 19 14 47.900 1.3
42.732246 141.999191 27.153 2018 9 6 19 15 25.800 2.5
42.567520 141.941055 15.038 2018 9 6 19 17 49.120 1.8
42.651482 142.018356 28.107 2018 9 6 19 21 51.520 1.6
42.627636 142.025406 31.277 2018 9 6 19 23 50.880 2.2
42.665741 142.033096 34.690 2018 9 6 19 25 22.620 1.5
42.596127 142.015198 29.890 2018 9 6 19 31 52.640 1.6
42.614632 141.927170 20.625 2018 9 6 19 32 28.400 1.2
42.690380 141.999115 26.355 2018 9 6 19 37 32.760 0.7
42.693073 142.014526 31.250 2018 9 6 19 39 37.600 1.0
42.759239 141.945572 18.332 2018 9 6 19 40 47.520 1.3
42.626797 141.994324 25.361 2018 9 6 19 43 13.960 0.8
42.664997 142.009079 23.576 2018 9 6 19 47 11.680 1.0
42.729191 141.825867 18.469 2018 9 6 19 48 17.680 1.4
42.614792 141.945938 22.379 2018 9 6 19 49 53.040 0.9
42.665318 142.017303 28.697 2018 9 6 19 50 31.200 1.9
42.609436 141.949905 10.800 2018 9 6 19 54 8.900 1.0
42.715240 141.942627 17.740 2018 9 6 19 54 46.840 1.0
42.675728 142.028381 29.752 2018 9 6 19 55 51.400 1.2
42.629349 142.005035 27.542 2018 9 6 19 57 45.520 1.4
42.781845 142.022736 31.083 2018 9 6 20 2 46.060 2.2
42.647469 141.924149 16.964 2018 9 6 20 4 22.960 1.6
42.640602 142.028961 25.996 2018 9 6 20 5 57.080 1.1
42.758862 141.972244 27.498 2018 9 6 20 6 42.480 1.0
42.821278 142.016846 27.122 2018 9 6 20 8 9.360 1.6
42.793686 142.025253 27.129 2018 9 6 20 8 58.720 1.6
42.579723 141.993271 28.738 2018 9 6 20 9 24.760 1.7
42.836349 142.015198 26.629 2018 9 6 20 11 10.280 1.5
42.644573 141.922531 17.641 2018 9 6 20 12 40.080 0.9
42.717205 142.028870 25.235 2018 9 6 20 13 52.840 0.8
42.760162 142.011871 29.262 2018 9 6 20 14 43.960 1.2
42.740311 142.024628 29.833 2018 9 6 20 17 41.840 1.4
42.609688 142.001328 29.911 2018 9 6 20 23 36.380 1.6
42.627392 142.023041 29.946 2018 9 6 20 24 54.660 1.5
42.698986 142.016037 24.032 2018 9 6 20 25 35.960 1.6
42.637527 142.019028 27.469 2018 9 6 20 28 24.560 1.4
42.785332 142.001923 27.509 2018 9 6 20 30 0.600 0.8
42.698040 141.938248 17.335 2018 9 6 20 34 15.120 0.9
42.636978 141.937256 14.386 2018 9 6 20 34 51.640 1.8
42.660862 142.034760 29.888 2018 9 6 20 36 1.560 1.6
42.683479 141.992264 24.581 2018 9 6 20 37 23.020 1.2
42.692482 142.016083 29.979 2018 9 6 20 39 6.920 0.8
42.611073 141.979965 22.776 2018 9 6 20 40 39.360 2.2
42.632710 142.015656 33.173 2018 9 6 20 40 55.960 2.1
42.649464 142.031830 31.318 2018 9 6 20 41 45.720 2.0
42.663933 142.000870 28.321 2018 9 6 20 47 28.560 1.3
42.719490 142.003784 27.560 2018 9 6 20 49 17.300 1.1
42.724991 142.004547 28.996 2018 9 6 20 49 43.720 2.5
42.454750 141.953827 5.631 2018 9 6 20 51 24.080 0.0
42.588341 141.990707 26.618 2018 9 6 20 51 27.600 0.9
42.710457 142.009171 28.955 2018 9 6 20 51 47.560 3.0
42.791969 142.013550 32.834 2018 9 6 20 53 56.360 3.1
42.729122 142.012299 30.693 2018 9 6 20 54 23.840 2.9
42.700924 142.007950 28.657 2018 9 6 20 55 44.040 1.5
42.604263 141.982666 25.770 2018 9 6 20 56 27.240 1.3
42.715397 141.993790 30.541 2018 9 6 20 57 59.280 1.0
42.637302 142.020035 30.312 2018 9 6 20 58 29.240 2.0
42.728836 142.009598 28.420 2018 9 6 21 1 41.480 2.7
42.671028 141.883148 15.942 2018 9 6 21 3 17.960 1.6
42.712269 142.005707 28.361 2018 9 6 21 3 23.620 1.3
42.606041 142.030182 31.241 2018 9 6 21 4 48.800 0.8
42.801708 142.036545 28.461 2018 9 6 21 5 4.780 2.3
42.661957 141.983917 11.458 2018 9 6 21 7 17.680 1.0
42.610287 142.001984 29.005 2018 9 6 21 8 6.340 1.2
42.667419 142.014709 28.854 2018 9 6 21 10 21.080 2.0
42.808380 142.010773 27.979 2018 9 6 21 11 52.080 0.9
42.678562 142.007111 33.563 2018 9 6 21 12 16.160 1.1
42.699707 142.012527 28.714 2018 9 6 21 14 19.800 2.9
42.708614 142.019974 30.520 2018 9 6 21 15 59.640 1.2
42.597588 141.986755 26.444 2018 9 6 21 17 23.440 2.7
42.687305 142.016525 31.467 2018 9 6 21 19 26.080 1.3
42.599842 141.988571 28.300 2018 9 6 21 20 44.660 2.2
42.755890 142.005524 31.896 2018 9 6 21 22 18.700 1.7
42.716801 142.016418 31.752 2018 9 6 21 23 8.700 1.2
42.695847 142.001038 31.302 2018 9 6 21 25 18.920 1.4
42.599369 141.963837 27.661 2018 9 6 21 29 6.780 1.0
42.731319 142.006744 28.490 2018 9 6 21 31 2.200 0.9
42.679317 141.994751 26.313 2018 9 6 21 31 59.560 0.7
42.776134 142.016388 29.211 2018 9 6 21 32 16.180 1.2
42.691139 142.012054 31.578 2018 9 6 21 33 30.380 0.9
42.749260 142.000275 30.802 2018 9 6 21 34 21.240 0.7
42.674213 141.992096 23.533 2018 9 6 21 35 53.120 1.3
42.631748 142.014404 29.675 2018 9 6 21 36 36.380 3.9
42.663605 142.017670 28.724 2018 9 6 21 38 53.280 1.4
42.588432 142.006485 23.785 2018 9 6 21 39 44.040 1.3
42.650459 141.928757 18.573 2018 9 6 21 43 12.540 1.3
42.654659 142.017822 30.951 2018 9 6 21 43 52.100 1.9
42.628269 142.030090 34.278 2018 9 6 21 44 58.880 1.2
42.592968 141.968369 26.370 2018 9 6 21 46 43.120 2.0
42.743542 141.989380 35.244 2018 9 6 21 48 4.840 1.6
42.661083 141.918076 18.360 2018 9 6 21 49 22.980 1.3
42.673622 141.923035 16.937 2018 9 6 21 55 43.540 0.9
42.604359 141.981964 35.204 2018 9 6 21 58 26.000 1.2
42.542580 141.934952 15.461 2018 9 6 21 59 37.560 0.9
42.678787 142.018341 30.469 2018 9 6 22 0 20.960 0.9
42.658424 141.935410 15.169 2018 9 6 22 1 41.440 1.1
42.688725 142.022919 28.441 2018 9 6 22 2 2.200 0.7
42.683716 142.002289 25.690 2018 9 6 22 3 46.960 1.0
42.586037 142.000946 29.008 2018 9 6 22 9 28.160 1.3
42.639057 142.017944 30.335 2018 9 6 22 9 44.080 1.6
42.733334 142.016830 32.205 2018 9 6 22 12 3.840 0.7
42.656002 141.934128 4.966 2018 9 6 22 13 19.680 0.9
42.711884 141.993103 22.725 2018 9 6 22 14 17.920 0.6
42.807758 142.007660 28.669 2018 9 6 22 17 58.640 0.9
42.636131 142.020309 28.002 2018 9 6 22 18 49.760 1.0
42.624184 142.003433 27.596 2018 9 6 22 20 19.940 3.1
42.597916 141.998337 28.859 2018 9 6 22 23 1.800 1.6
42.747528 142.001129 24.368 2018 9 6 22 25 56.920 0.2
42.728481 142.012085 27.163 2018 9 6 22 27 31.900 1.6
42.651306 142.029099 32.339 2018 9 6 22 29 3.560 1.1
42.666481 141.922623 12.811 2018 9 6 22 30 49.840 0.0
42.631306 142.014374 35.047 2018 9 6 22 31 50.840 1.1
42.792835 142.030563 29.398 2018 9 6 22 32 49.940 2.0
42.591042 141.972321 27.757 2018 9 6 22 35 17.000 0.7
42.624172 141.994614 26.326 2018 9 6 22 35 49.640 4.0
42.670433 142.045853 30.900 2018 9 6 22 41 58.960 1.3
42.713520 142.007812 28.214 2018 9 6 22 43 51.400 0.8
42.695446 141.882538 21.126 2018 9 6 22 44 58.120 1.4
42.666023 142.004715 30.636 2018 9 6 22 48 15.220 1.4
42.594975 141.965439 27.302 2018 9 6 22 50 22.700 2.0
42.648430 141.953079 23.549 2018 9 6 22 52 18.900 0.9
42.616425 142.030472 37.356 2018 9 6 22 53 15.520 0.9
42.671459 142.020096 29.822 2018 9 6 22 55 58.760 1.9
42.724628 142.012085 29.874 2018 9 6 22 59 22.960 2.3
42.633240 142.023254 29.901 2018 9 6 23 0 7.100 1.8
42.596157 141.959473 26.323 2018 9 6 23 1 27.720 1.0
42.703827 142.024460 27.940 2018 9 6 23 3 14.480 1.2
42.686417 142.023895 30.691 2018 9 6 23 8 3.080 1.5
42.580376 141.887939 15.099 2018 9 6 23 8 38.060 1.6
42.652920 142.011032 24.630 2018 9 6 23 9 32.180 1.3
42.656086 142.030487 29.189 2018 9 6 23 10 4.480 1.0
42.617924 141.940323 16.487 2018 9 6 23 12 3.360 2.1
42.726311 141.944153 23.427 2018 9 6 23 12 50.960 1.2
42.708103 142.008102 28.717 2018 9 6 23 15 1.400 1.6
42.720089 142.008911 33.787 2018 9 6 23 18 12.920 0.8
42.660103 141.990829 22.109 2018 9 6 23 18 21.680 1.2
42.641422 142.002487 28.756 2018 9 6 23 19 12.120 0.8
42.707539 141.958420 19.823 2018 9 6 23 20 48.880 1.2
42.682720 141.952499 18.532 2018 9 6 23 20 57.680 2.0
42.676182 142.000610 27.631 2018 9 6 23 22 30.960 1.7
42.687675 142.011917 27.337 2018 9 6 23 26 59.880 0.9
42.618374 141.985352 32.229 2018 9 6 23 29 53.680 1.0
42.655403 142.068832 34.810 2018 9 6 23 31 2.460 0.9
42.674580 142.025253 27.643 2018 9 6 23 32 21.360 2.3
42.759373 142.015228 27.376 2018 9 6 23 33 3.680 1.5
42.613163 141.970215 26.456 2018 9 6 23 34 32.000 1.0
42.806068 142.029282 26.471 2018 9 6 23 35 31.680 0.3
42.685440 142.044052 34.910 2018 9 6 23 36 10.720 0.9
42.674694 141.984940 24.669 2018 9 6 23 38 51.720 1.1
42.636963 142.043564 33.343 2018 9 6 23 39 42.240 3.3
42.609833 142.005554 30.139 2018 9 6 23 42 30.780 1.6
42.770981 142.019943 31.212 2018 9 6 23 43 48.520 4.1
42.685928 142.002991 27.441 2018 9 6 23 48 10.760 2.0
42.774483 142.021210 27.939 2018 9 6 23 50 29.760 0.9
42.609135 141.930023 23.149 2018 9 6 23 52 14.100 0.7
42.670135 141.939499 16.067 2018 9 6 23 52 18.040 0.8
42.618073 142.030212 29.075 2018 9 6 23 53 44.780 1.2
42.620300 141.980026 25.296 2018 9 6 23 54 50.980 1.3
42.610748 141.980453 33.298 2018 9 6 23 57 9.800 0.5
42.722385 142.011627 28.353 2018 9 6 23 58 2.620 1.1
42.748344 142.008438 28.870 2018 9 6 23 58 59.440 1.1
42.658302 142.011108 26.770 2018 9 6 23 59 34.440 1.8
42.743187 141.996323 28.318 2018 9 7 0 0 35.890 0.9
42.624798 142.011154 29.904 2018 9 7 0 1 6.010 2.7
42.655567 142.006607 38.444 2018 9 7 0 2 5.180 1.6
42.695995 142.007477 30.528 2018 9 7 0 3 16.150 2.8
42.718288 142.010910 29.163 2018 9 7 0 7 18.560 1.9
42.630089 141.998291 28.505 2018 9 7 0 9 7.620 2.9
42.647026 142.022629 39.842 2018 9 7 0 11 26.610 2.5
42.709030 142.016754 28.896 2018 9 7 0 13 47.890 0.6
42.806118 142.024261 20.119 2018 9 7 0 15 26.260 1.0
42.601803 141.998337 28.556 2018 9 7 0 16 8.920 0.9
42.624245 142.013550 27.384 2018 9 7 0 16 21.310 1.2
42.641464 142.027573 33.714 2018 9 7 0 17 16.370 1.1
42.601891 141.987885 27.177 2018 9 7 0 19 2.210 0.7
42.695461 142.017944 27.678 2018 9 7 0 23 23.380 2.6
42.613865 141.990570 32.253 2018 9 7 0 24 37.180 1.5
42.678596 142.016022 25.699 2018 9 7 0 25 12.860 1.0
42.605831 141.995224 28.982 2018 9 7 0 28 44.160 1.3
42.696709 142.018372 29.398 2018 9 7 0 29 55.280 0.8
42.727966 142.005203 26.455 2018 9 7 0 31 37.020 1.2
42.711918 142.001373 27.199 2018 9 7 0 36 26.010 2.7
42.640739 142.002136 15.550 2018 9 7 0 37 20.820 1.3
42.670479 142.016205 28.264 2018 9 7 0 39 43.360 2.5
42.520138 141.922638 26.430 2018 9 7 0 42 32.900 1.1
42.587372 141.987152 30.037 2018 9 7 0 43 6.880 1.0
42.688782 142.006531 28.970 2018 9 7 0 43 42.090 2.3
42.667789 141.913803 15.432 2018 9 7 0 45 36.060 0.7
42.612793 141.991989 33.357 2018 9 7 0 46 9.290 3.7
42.603065 142.008301 27.479 2018 9 7 0 53 14.070 1.8
42.696110 142.022507 27.347 2018 9 7 0 54 42.930 1.7
42.633472 141.998993 27.654 2018 9 7 0 55 34.790 1.0
42.818600 142.021790 28.844 2018 9 7 0 56 21.820 2.2
42.698631 142.012711 30.427 2018 9 7 1 0 45.970 2.4
42.671513 141.927322 16.825 2018 9 7 1 1 5.620 2.5
42.724220 141.993652 25.138 2018 9 7 1 1 38.200 2.5
42.607265 142.007080 31.582 2018 9 7 1 2 22.440 3.7
42.628990 142.024612 29.316 2018 9 7 1 2 52.290 3.4
42.699818 141.955673 19.699 2018 9 7 1 7 56.410 2.1
42.595444 142.002502 29.657 2018 9 7 1 9 42.870 2.0
42.679314 141.932632 18.125 2018 9 7 1 10 37.310 1.7
42.606045 141.967361 20.483 2018 9 7 1 16 3.620 0.9
42.587154 142.007935 28.010 2018 9 7 1 18 19.070 1.4
42.660240 142.022354 29.009 2018 9 7 1 23 31.650 1.8
42.610577 142.000549 30.144 2018 9 7 1 24 3.740 1.3
42.611279 141.999329 26.928 2018 9 7 1 25 34.410 1.1
42.629566 142.006790 26.968 2018 9 7 1 26 17.980 2.1
42.601261 141.989609 27.098 2018 9 7 1 28 18.320 2.4
42.628201 141.994965 25.528 2018 9 7 1 31 49.410 1.6
42.589130 141.974396 28.630 2018 9 7 1 33 2.600 1.5
42.669048 142.029999 31.212 2018 9 7 1 33 25.970 1.3
42.600132 142.020203 32.266 2018 9 7 1 33 49.500 2.7
42.680580 141.942627 15.353 2018 9 7 1 36 46.740 1.3
42.703552 142.017563 27.235 2018 9 7 1 37 55.620 1.4
42.647827 141.989243 26.043 2018 9 7 1 38 40.090 1.5
42.630798 142.004868 28.989 2018 9 7 1 41 33.040 4.2
42.642048 142.011230 28.849 2018 9 7 1 43 47.180 1.8
42.662956 141.997269 22.218 2018 9 7 1 44 26.790 1.5
42.690357 142.029861 29.260 2018 9 7 1 45 4.700 0.7
42.689663 142.018738 30.859 2018 9 7 1 50 31.110 1.1
42.617496 141.984070 28.918 2018 9 7 1 51 43.680 1.0
42.630516 141.916000 16.577 2018 9 7 1 52 25.100 0.8
42.646019 142.030243 35.467 2018 9 7 1 53 18.500 0.8
42.562656 141.934311 22.649 2018 9 7 1 54 14.690 0.9
42.542080 141.936142 17.468 2018 9 7 1 54 19.280 1.0
42.665806 141.940323 16.535 2018 9 7 1 55 9.130 1.1
42.714050 142.024063 35.687 2018 9 7 1 58 3.310 0.9
42.678539 141.921890 16.899 2018 9 7 1 59 53.200 1.5
42.715981 142.014313 28.256 2018 9 7 2 8 23.160 0.9
42.726257 141.951614 19.136 2018 9 7 2 9 35.560 1.7
42.597313 142.007370 29.584 2018 9 7 2 10 17.750 2.9
42.658730 142.013901 30.105 2018 9 7 2 15 11.150 2.5
42.611629 141.986450 25.551 2018 9 7 2 20 51.670 0.6
42.590832 141.994873 26.350 2018 9 7 2 22 7.870 1.2
42.709534 142.019485 25.676 2018 9 7 2 22 58.290 0.9
42.687157 141.987396 27.633 2018 9 7 2 25 40.830 1.0
42.661953 142.029816 33.948 2018 9 7 2 25 59.370 2.1
42.695877 142.001434 27.841 2018 9 7 2 27 17.480 1.0
42.742588 142.007919 29.419 2018 9 7 2 27 34.770 1.8
42.714130 142.004883 25.271 2018 9 7 2 28 24.910 1.3
42.561577 142.024536 12.985 2018 9 7 2 29 50.450 0.0
42.608337 141.996918 29.917 2018 9 7 2 29 55.770 1.7
42.614143 142.008881 28.284 2018 9 7 2 30 26.340 1.5
42.612446 141.938858 17.336 2018 9 7 2 33 41.420 1.2
42.611088 142.001617 28.002 2018 9 7 2 33 44.910 1.5
42.734100 142.014893 42.524 2018 9 7 2 34 1.240 1.5
42.765797 142.026016 27.102 2018 9 7 2 36 36.620 0.9
42.626934 141.928024 17.737 2018 9 7 2 39 51.350 1.1
42.649277 142.027161 31.296 2018 9 7 2 44 25.510 1.3
42.666645 142.031555 32.419 2018 9 7 2 47 0.950 2.2
42.745113 141.883896 16.311 2018 9 7 2 49 59.280 0.9
42.698700 141.992355 25.185 2018 9 7 2 50 14.900 1.4
42.611881 141.979599 29.503 2018 9 7 2 52 26.040 0.7
42.667801 142.017014 29.907 2018 9 7 2 53 35.460 1.1
42.656239 142.009201 25.741 2018 9 7 2 54 0.730 0.6
42.649929 141.997498 27.316 2018 9 7 2 58 10.080 1.1
42.701092 142.016769 29.173 2018 9 7 2 59 10.690 1.2
42.592777 142.011093 30.895 2018 9 7 2 59 33.980 0.9
42.673222 141.999344 25.701 2018 9 7 3 1 23.270 2.2
42.633106 142.027557 30.703 2018 9 7 3 2 9.700 2.7
42.614277 141.934753 17.287 2018 9 7 3 4 38.280 1.4
42.763630 142.028000 27.176 2018 9 7 3 4 55.900 1.3
42.735371 142.012161 25.849 2018 9 7 3 6 2.050 0.9
42.684814 142.018097 29.600 2018 9 7 3 14 31.610 2.0
42.662853 142.022079 29.390 2018 9 7 3 21 17.350 1.3
42.692032 142.010727 26.948 2018 9 7 3 26 25.480 1.5
42.647717 142.029816 35.923 2018 9 7 3 28 28.760 0.5
42.883133 141.914001 23.947 2018 9 7 3 29 43.040 0.2
42.680874 142.016281 30.459 2018 9 7 3 30 51.750 1.5
42.759258 141.999054 28.891 2018 9 7 3 33 40.870 1.3
42.602409 142.009705 29.669 2018 9 7 3 34 38.770 1.3
42.712704 142.163177 41.227 2018 9 7 3 36 21.270 0.2
42.635452 141.944916 22.395 2018 9 7 3 37 28.180 1.3
42.656662 142.045578 32.647 2018 9 7 3 43 48.770 0.9
42.723087 142.009445 27.392 2018 9 7 3 46 25.360 0.4
42.620987 141.997849 27.709 2018 9 7 3 47 32.920 3.6
42.679668 142.020538 29.042 2018 9 7 3 48 52.450 0.0
42.621353 142.002899 26.885 2018 9 7 3 54 7.230 2.6
42.555134 141.954620 26.085 2018 9 7 3 59 50.730 1.4
42.613651 141.985870 27.967 2018 9 7 4 0 58.780 1.0
42.526550 141.945862 21.929 2018 9 7 4 1 33.510 1.3
42.620102 141.911011 26.134 2018 9 7 4 3 11.750 1.1
42.675758 142.003036 28.862 2018 9 7 4 6 57.940 1.6
42.746563 142.017258 30.322 2018 9 7 4 8 39.260 1.5
42.765614 142.033417 28.223 2018 9 7 4 12 52.250 1.9
42.680660 142.008026 26.252 2018 9 7 4 17 19.410 1.2
42.674648 142.004898 30.370 2018 9 7 4 18 38.050 1.8
42.671043 142.027847 29.943 2018 9 7 4 20 11.960 1.7
42.814499 142.020309 30.937 2018 9 7 4 24 5.240 1.5
42.629723 142.005539 32.533 2018 9 7 4 31 21.520 1.6
42.698040 141.994644 27.782 2018 9 7 4 31 45.390 3.5
42.689899 141.998154 25.508 2018 9 7 4 34 52.180 1.3
42.754921 142.005798 35.645 2018 9 7 4 37 21.900 0.6
42.728645 142.008362 30.766 2018 9 7 4 37 53.530 4.1
42.590618 142.007614 28.437 2018 9 7 4 39 2.530 2.9
42.651024 142.055496 37.995 2018 9 7 4 40 15.990 1.7
42.635220 142.007217 26.899 2018 9 7 4 42 20.710 1.2
42.624134 142.013977 28.638 2018 9 7 4 42 50.210 1.7
42.702034 142.024307 38.442 2018 9 7 4 43 1.870 1.5
42.766380 142.010483 25.842 2018 9 7 4 44 38.690 0.4
42.548031 141.942429 22.529 2018 9 7 4 46 32.390 0.9
42.606243 142.006805 33.042 2018 9 7 4 48 13.500 4.1
42.696255 142.009811 35.006 2018 9 7 4 53 35.780 0.3
42.716717 142.004715 27.789 2018 9 7 4 57 34.270 1.9
42.588497 141.992599 33.838 2018 9 7 5 1 14.050 0.0
42.793468 141.941696 16.724 2018 9 7 5 1 26.180 1.5
42.681797 142.014160 36.102 2018 9 7 5 1 31.810 1.4
42.599663 141.938675 29.886 2018 9 7 5 6 27.510 0.6
42.658115 141.931549 16.582 2018 9 7 5 9 58.940 0.6
42.627705 142.034500 31.127 2018 9 7 5 10 22.220 0.9
42.664703 142.014450 26.984 2018 9 7 5 12 31.580 2.0
42.728081 141.998703 25.327 2018 9 7 5 17 9.860 0.8
42.628922 141.998398 26.994 2018 9 7 5 18 19.510 0.4
42.694489 142.016708 28.479 2018 9 7 5 18 43.320 2.9
42.680393 142.018265 27.874 2018 9 7 5 20 22.250 1.3
42.669956 142.014511 28.442 2018 9 7 5 21 21.440 2.3
42.662880 142.022446 30.247 2018 9 7 5 22 46.380 1.6
42.621563 142.025299 30.985 2018 9 7 5 26 18.060 1.2
42.697445 142.008224 28.594 2018 9 7 5 28 55.400 1.0
42.629616 142.031708 29.996 2018 9 7 5 32 9.650 2.5
42.594120 141.991226 27.001 2018 9 7 5 33 36.310 1.0
42.616913 142.019775 29.391 2018 9 7 5 40 20.440 1.3
42.595917 142.018402 25.952 2018 9 7 5 44 20.440 0.9
42.623497 141.961548 26.851 2018 9 7 5 46 10.310 0.8
42.779846 142.032379 29.022 2018 9 7 5 47 19.380 2.0
42.603783 141.991516 27.021 2018 9 7 5 49 27.620 1.4
42.691730 142.006897 27.027 2018 9 7 5 52 13.780 1.4
42.633282 141.947586 17.532 2018 9 7 5 55 8.170 0.9
42.653927 142.022919 33.531 2018 9 7 6 1 30.070 2.3
42.777805 141.943970 13.418 2018 9 7 6 4 30.560 0.5
42.623726 142.002243 29.448 2018 9 7 6 5 50.010 1.4
42.708668 142.018890 33.043 2018 9 7 6 7 43.290 1.1
42.698566 142.013901 29.810 2018 9 7 6 14 34.300 1.4
42.667671 142.015869 28.780 2018 9 7 6 20 15.410 2.3
42.696949 142.025223 33.425 2018 9 7 6 26 13.500 0.3
42.628613 141.949692 15.552 2018 9 7 6 26 38.780 1.6
42.630817 142.032806 33.315 2018 9 7 6 36 24.760 1.5
42.594872 142.008224 29.133 2018 9 7 6 38 29.780 1.6
42.817913 142.013214 28.141 2018 9 7 6 39 55.390 1.3
42.641537 142.023468 30.920 2018 9 7 6 40 56.850 1.9
42.614594 142.002533 34.179 2018 9 7 6 42 48.670 0.0
42.741009 142.017456 27.139 2018 9 7 6 45 2.190 1.1
42.664814 142.021362 27.462 2018 9 7 6 45 26.830 1.5
42.694035 142.031219 37.607 2018 9 7 6 46 12.230 1.0
42.620041 141.983597 33.652 2018 9 7 6 48 13.640 0.9
42.813885 142.007004 25.889 2018 9 7 6 52 7.340 1.0
42.781090 141.939102 14.890 2018 9 7 7 3 55.320 1.1
42.811855 142.037415 28.736 2018 9 7 7 4 49.560 2.3
42.660786 142.038177 35.960 2018 9 7 7 7 19.050 1.1
42.612045 142.001160 34.724 2018 9 7 7 10 5.960 4.1
42.675259 142.007584 27.605 2018 9 7 7 13 35.460 2.5
42.719658 142.002777 27.709 2018 9 7 7 17 18.380 0.9
42.687588 141.941635 17.886 2018 9 7 7 29 27.310 0.9
42.644058 142.028275 30.982 2018 9 7 7 38 26.930 1.2
42.630013 141.987091 36.580 2018 9 7 7 40 41.310 0.1
42.623577 142.015900 29.270 2018 9 7 7 40 51.930 1.5
42.641296 142.006821 27.216 2018 9 7 7 41 44.260 2.2
42.596584 142.003998 30.683 2018 9 7 7 43 36.300 1.4
42.611427 142.004608 31.210 2018 9 7 7 44 20.890 1.4
42.591599 141.931778 25.268 2018 9 7 7 49 51.170 1.4
42.699211 142.011841 28.476 2018 9 7 7 50 59.210 1.5
42.656956 142.036621 37.592 2018 9 7 7 53 25.780 1.0
42.606377 142.021149 29.845 2018 9 7 7 55 34.750 2.5
42.607983 142.007690 32.317 2018 9 7 7 57 1.660 2.5
42.765846 142.044006 32.455 2018 9 7 8 0 30.800 1.0
42.817532 142.003708 25.867 2018 9 7 8 2 22.620 0.8
42.602676 142.023087 30.356 2018 9 7 8 8 36.800 1.1
42.776386 142.015366 33.082 2018 9 7 8 11 39.430 0.8
42.615055 141.995987 30.469 2018 9 7 8 20 30.360 2.5
42.604034 141.994751 30.483 2018 9 7 8 22 51.430 1.9
42.595650 142.021011 29.658 2018 9 7 8 26 10.720 0.7
42.596760 142.015656 29.202 2018 9 7 8 32 44.610 1.1
42.660851 142.026642 31.943 2018 9 7 8 33 54.170 1.1
42.590881 141.973511 27.189 2018 9 7 8 37 26.460 2.4
42.618736 142.040329 27.262 2018 9 7 8 42 4.320 1.4
42.663292 142.028336 34.425 2018 9 7 8 43 12.950 3.0
42.771549 142.009216 30.263 2018 9 7 8 51 46.380 1.1
42.634121 142.033081 34.295 2018 9 7 8 53 52.760 1.9
42.697693 142.019119 32.037 2018 9 7 8 59 34.550 1.1
42.668037 142.088669 21.175 2018 9 7 9 3 49.980 1.1
42.659687 142.029907 31.547 2018 9 7 9 5 56.870 1.9
42.644409 141.997131 19.434 2018 9 7 9 8 39.680 1.2
42.998772 142.060684 34.939 2018 9 7 9 9 1.480 1.5
42.690979 142.009247 29.415 2018 9 7 9 15 16.330 0.8
42.679630 142.000244 28.425 2018 9 7 9 23 11.800 0.8
42.679279 141.928635 18.342 2018 9 7 9 27 1.140 2.2
42.748344 141.940262 33.845 2018 9 7 9 28 9.400 1.3
42.668011 142.004517 27.046 2018 9 7 9 28 56.070 2.2
42.722328 142.002655 22.863 2018 9 7 9 30 24.200 0.7
42.611290 141.983200 27.872 2018 9 7 9 35 18.090 1.5
42.598927 141.988312 28.892 2018 9 7 9 50 21.140 2.0
42.790905 142.022110 29.513 2018 9 7 9 54 36.670 1.7
42.608269 141.980789 26.180 2018 9 7 10 1 7.200 1.1
42.638515 142.037827 30.122 2018 9 7 10 8 40.840 1.0
42.686596 142.004578 32.120 2018 9 7 10 11 34.020 2.1
42.559956 142.013138 18.689 2018 9 7 10 11 55.620 1.7
42.682156 142.005249 24.456 2018 9 7 10 14 18.810 0.8
42.653969 141.998062 21.646 2018 9 7 10 22 31.910 0.9
42.706547 142.011353 29.475 2018 9 7 10 25 38.830 2.2
42.712971 142.005798 27.364 2018 9 7 10 27 59.500 1.2
42.607998 141.986145 32.950 2018 9 7 10 28 18.640 1.3
42.786049 142.007141 33.622 2018 9 7 10 34 21.370 0.8
42.675331 142.002686 27.272 2018 9 7 10 40 45.730 3.3
42.674122 142.048431 28.819 2018 9 7 10 41 35.950 2.7
42.671307 142.021149 26.552 2018 9 7 10 43 57.040 1.6
42.632561 142.023621 31.661 2018 9 7 10 44 49.850 2.0
42.686024 141.984756 24.060 2018 9 7 10 48 26.060 1.7
42.583172 141.968552 24.152 2018 9 7 10 52 32.650 2.1
42.630684 142.056946 28.177 2018 9 7 11 0 50.670 1.1
42.610313 142.005981 35.066 2018 9 7 11 2 54.550 1.2
42.666550 142.026535 30.850 2018 9 7 11 3 50.370 0.8
42.691032 142.027863 35.139 2018 9 7 11 15 19.990 1.1
42.753838 142.001678 27.372 2018 9 7 11 41 26.100 0.9
42.615932 141.982361 25.186 2018 9 7 11 49 10.770 1.6
42.608139 141.979416 28.834 2018 9 7 12 8 23.860 1.5
42.622585 142.023682 29.452 2018 9 7 12 10 41.730 0.8
42.626125 141.995773 28.602 2018 9 7 12 14 11.630 0.8
42.594467 141.997742 29.420 2018 9 7 12 21 20.630 3.3
42.725735 142.003113 28.109 2018 9 7 12 23 44.920 1.6
42.693142 142.003113 28.204 2018 9 7 12 59 49.100 2.3
42.719883 142.006363 30.753 2018 9 7 13 5 5.340 1.0
42.710194 142.020828 30.395 2018 9 7 13 10 39.210 0.8
42.722340 142.086975 20.402 2018 9 7 13 11 36.170 1.3
42.588760 142.014236 27.764 2018 9 7 13 15 7.600 1.6
42.706245 142.006882 28.138 2018 9 7 13 17 41.750 2.1
42.545181 141.878311 29.370 2018 9 7 13 19 2.610 1.9
42.586773 142.002167 15.006 2018 9 7 13 20 58.060 1.1
42.716946 141.945770 18.230 2018 9 7 13 21 36.350 2.3
42.700211 142.000320 30.156 2018 9 7 13 25 23.640 4.5
42.734238 142.010193 28.422 2018 9 7 13 39 47.840 1.4
42.609249 142.013290 28.111 2018 9 7 13 40 35.760 1.2
42.776398 142.025955 30.389 2018 9 7 13 41 40.220 3.2
42.703590 142.019226 30.467 2018 9 7 13 47 30.720 1.5
42.683079 142.003418 24.749 2018 9 7 13 47 43.850 2.1
42.739853 141.999191 29.294 2018 9 7 13 52 19.070 2.6
42.602543 142.000717 30.935 2018 9 7 13 54 16.450 2.1
42.683578 141.988663 26.336 2018 9 7 13 56 58.440 3.4
42.637959 142.033676 35.719 2018 9 7 14 0 31.280 3.2
42.699581 142.005249 29.744 2018 9 7 14 14 25.370 1.1
42.734245 141.961624 13.868 2018 9 7 14 15 31.370 0.8
42.586842 142.014038 29.954 2018 9 7 14 27 18.350 2.5
42.616348 142.010452 32.229 2018 9 7 14 28 29.500 1.4
42.651936 142.019394 27.042 2018 9 7 14 34 39.090 1.1
42.608421 141.995636 30.548 2018 9 7 14 38 35.490 1.3
42.658279 141.903000 12.254 2018 9 7 14 40 18.230 1.3
42.592682 142.000122 29.179 2018 9 7 14 44 5.790 2.0
42.722378 142.033981 28.088 2018 9 7 14 47 15.520 1.0
42.660339 142.012878 27.862 2018 9 7 14 49 18.390 1.3
42.602932 141.983719 32.057 2018 9 7 14 52 59.090 1.2
42.592712 141.996933 29.218 2018 9 7 15 7 18.080 1.6
42.664829 142.016861 34.685 2018 9 7 15 8 6.150 1.1
42.669380 141.930939 14.026 2018 9 7 15 8 36.140 1.2
42.603714 141.980179 33.923 2018 9 7 15 12 42.750 1.3
42.644070 141.873901 13.234 2018 9 7 15 13 7.880 1.4
42.714344 141.951828 21.166 2018 9 7 15 18 43.540 0.7
42.733070 142.000671 30.776 2018 9 7 15 18 49.900 2.8
42.664253 142.014603 28.008 2018 9 7 15 20 57.340 1.4
42.775211 141.944016 18.354 2018 9 7 15 26 16.030 2.1
42.782219 141.936295 13.518 2018 9 7 15 28 51.190 0.9
42.662983 142.035767 34.039 2018 9 7 15 41 16.820 1.4
42.750473 142.035034 33.041 2018 9 7 15 42 47.920 3.6
42.668827 142.029922 34.715 2018 9 7 15 51 18.700 1.7
42.676788 142.005768 29.883 2018 9 7 15 51 30.560 1.8
42.705029 142.026031 29.783 2018 9 7 15 54 6.570 1.3
42.615639 142.015350 29.086 2018 9 7 15 58 31.520 1.5
42.618347 142.023499 31.012 2018 9 7 16 12 24.940 2.3
42.718540 142.008163 28.277 2018 9 7 16 24 36.300 1.7
42.677917 142.042282 26.725 2018 9 7 16 25 52.770 1.2
42.698849 142.003387 30.706 2018 9 7 16 28 49.740 1.3
42.804482 142.012131 28.414 2018 9 7 16 36 19.370 2.0
42.677090 141.998108 29.386 2018 9 7 16 37 45.100 2.1
42.632690 141.940796 17.684 2018 9 7 16 40 3.800 1.0
42.777878 142.027344 27.781 2018 9 7 16 40 42.450 1.6
42.697838 142.020554 29.360 2018 9 7 16 47 41.730 1.1
42.804024 142.014267 29.400 2018 9 7 16 48 52.080 2.0
42.639622 142.038483 31.378 2018 9 7 16 56 17.120 1.0
42.575470 141.972275 20.245 2018 9 7 17 3 30.680 1.4
42.701790 142.012314 33.587 2018 9 7 17 5 24.600 1.0
42.563953 141.935608 18.393 2018 9 7 17 11 6.600 1.4
42.724766 142.007675 29.443 2018 9 7 17 11 57.120 3.5
42.719200 142.023041 28.739 2018 9 7 17 15 44.920 1.8
42.650574 142.028885 34.813 2018 9 7 17 17 49.280 2.2
42.727913 142.013718 29.054 2018 9 7 17 19 40.740 1.1
42.626324 141.991714 25.637 2018 9 7 17 25 1.680 0.3
42.713936 142.024368 28.261 2018 9 7 17 28 48.800 1.0
42.698792 142.015808 31.671 2018 9 7 17 38 19.560 0.7
42.730270 142.016052 29.550 2018 9 7 17 39 18.120 0.5
42.646061 142.030350 33.558 2018 9 7 17 39 27.160 2.2
42.662880 142.008224 27.156 2018 9 7 17 50 43.100 2.5
42.808784 141.921127 17.558 2018 9 7 17 55 31.840 1.8
42.695450 142.001816 28.188 2018 9 7 17 57 24.600 2.0
42.687908 141.928696 15.868 2018 9 7 18 2 7.520 1.3
42.684017 142.012878 33.258 2018 9 7 18 5 58.560 1.4
42.689312 141.985077 32.405 2018 9 7 18 8 12.160 1.3
42.605183 142.004745 29.061 2018 9 7 18 10 6.200 2.1
42.611282 142.007187 31.660 2018 9 7 18 11 20.600 3.9
42.629990 142.003525 28.112 2018 9 7 18 14 1.640 1.5
42.640652 141.990967 23.990 2018 9 7 18 15 12.600 1.5
42.706696 141.988403 33.104 2018 9 7 18 24 3.000 3.0
42.609940 141.987793 24.755 2018 9 7 18 31 20.560 2.4
42.627117 142.005280 28.635 2018 9 7 18 39 44.480 0.5
42.716797 142.019821 28.438 2018 9 7 18 41 23.520 2.6
42.604603 142.017120 32.105 2018 9 7 18 47 47.400 2.5
42.617950 142.008972 29.706 2018 9 7 18 54 44.320 1.1
42.654930 142.015152 27.849 2018 9 7 19 8 47.200 2.2
42.656139 142.018906 27.171 2018 9 7 19 10 0.840 1.4
42.693199 142.013031 31.917 2018 9 7 19 10 34.660 1.4
42.610222 142.000687 28.663 2018 9 7 19 14 33.920 0.0
42.654926 141.879745 16.639 2018 9 7 19 18 22.840 1.6
42.715530 141.947449 15.493 2018 9 7 19 20 8.000 1.0
42.647369 141.950241 22.484 2018 9 7 19 22 46.360 1.5
42.675777 141.960449 19.895 2018 9 7 19 34 55.080 1.0
42.641762 142.022659 31.965 2018 9 7 19 35 54.960 0.9
42.639751 141.974472 21.577 2018 9 7 19 37 37.240 1.0
42.749729 142.043411 26.498 2018 9 7 19 38 10.720 0.9
42.738609 142.009247 29.932 2018 9 7 19 44 58.160 0.9
42.802574 142.003616 30.061 2018 9 7 19 49 1.760 0.7
42.620785 141.981171 26.282 2018 9 7 19 54 38.440 1.6
42.652599 142.022568 30.258 2018 9 7 19 58 42.120 3.0
42.780556 142.031876 29.302 2018 9 7 20 0 45.160 2.1
42.579842 142.027420 28.292 2018 9 7 20 8 54.040 1.5
42.649960 142.013763 28.580 2018 9 7 20 15 23.520 2.0
42.646633 142.021423 31.536 2018 9 7 20 19 18.320 1.5
42.682495 142.006897 29.500 2018 9 7 20 21 59.020 2.2
42.666126 142.043381 29.656 2018 9 7 20 26 13.720 1.6
42.530777 141.990952 21.934 2018 9 7 20 30 6.040 1.5
42.646530 142.027512 34.845 2018 9 7 20 30 45.360 1.5
42.603527 141.990356 30.583 2018 9 7 20 35 26.440 1.9
42.607029 142.011749 32.142 2018 9 7 20 45 15.380 1.8
42.684753 142.002808 26.744 2018 9 7 20 50 11.580 1.6
42.773998 142.003677 32.894 2018 9 7 20 51 2.240 2.8
42.797337 142.008850 28.560 2018 9 7 20 52 57.600 1.5
42.712997 142.005981 27.937 2018 9 7 20 53 49.820 1.3
42.670605 141.949493 18.693 2018 9 7 20 56 1.820 0.0
42.671658 141.935211 17.030 2018 9 7 20 57 0.960 0.0
42.706074 142.019989 28.896 2018 9 7 20 59 46.360 1.5
42.587181 141.980545 23.122 2018 9 7 21 0 3.680 1.9
42.600811 142.010132 31.301 2018 9 7 21 5 16.280 1.3
42.653561 141.916687 14.385 2018 9 7 21 11 13.320 1.4
42.605625 142.027359 31.148 2018 9 7 21 11 49.440 1.3
42.661976 141.995117 24.606 2018 9 7 21 15 42.040 1.2
42.525028 141.946228 27.911 2018 9 7 21 16 43.360 1.3
42.676189 142.013123 28.130 2018 9 7 21 17 44.800 2.2
42.634827 141.976944 23.563 2018 9 7 21 20 2.960 2.0
42.634518 142.034668 27.218 2018 9 7 21 20 16.520 2.3
42.713432 142.017319 29.844 2018 9 7 21 24 55.920 1.4
42.609787 142.021820 31.539 2018 9 7 21 34 25.640 2.0
42.708027 142.012421 29.255 2018 9 7 21 37 41.040 1.5
42.596645 141.979156 24.814 2018 9 7 21 37 59.120 1.5
42.799839 142.007568 30.086 2018 9 7 21 38 56.080 1.7
42.738869 142.005722 26.897 2018 9 7 21 40 41.520 1.3
42.605999 142.005157 32.212 2018 9 7 21 46 50.200 2.3
42.580746 142.004089 34.024 2018 9 7 21 56 0.480 0.0
42.647820 142.010681 29.689 2018 9 7 22 0 14.020 1.6
42.663437 142.015228 27.127 2018 9 7 22 1 21.360 1.2
42.617725 141.987122 28.796 2018 9 7 22 5 27.880 1.1
42.701206 141.945312 16.874 2018 9 7 22 9 56.980 1.1
42.689240 141.949356 18.364 2018 9 7 22 12 9.400 1.6
42.610626 142.002594 30.377 2018 9 7 22 16 59.020 1.2
42.591724 142.020630 28.945 2018 9 7 22 22 46.680 1.3
42.606865 141.984756 27.603 2018 9 7 22 25 41.200 1.5
42.801479 141.939636 16.687 2018 9 7 22 28 7.160 1.2
42.711121 142.008301 28.495 2018 9 7 22 29 21.240 3.0
42.667866 142.028091 29.846 2018 9 7 22 31 15.300 1.3
42.676983 141.942307 18.722 2018 9 7 22 32 24.800 0.0
42.677059 141.920410 9.405 2018 9 7 22 34 10.040 0.0
42.619915 141.993317 22.835 2018 9 7 22 35 11.880 1.3
42.651276 142.022949 32.538 2018 9 7 22 40 15.840 0.6
42.737438 142.034195 32.215 2018 9 7 22 43 45.320 4.4
42.724236 142.010818 28.802 2018 9 7 22 47 19.320 1.5
42.676212 142.022888 31.611 2018 9 7 22 49 13.840 1.4
42.710636 142.023392 28.657 2018 9 7 22 52 4.260 1.5
42.746304 142.040131 29.220 2018 9 7 22 56 0.740 1.6
42.692337 142.021164 28.014 2018 9 7 22 56 5.240 3.0
42.658249 142.022842 36.319 2018 9 7 22 58 41.800 1.6
42.820187 141.996567 25.091 2018 9 7 23 7 40.520 1.1
42.589012 141.985596 22.780 2018 9 7 23 12 8.220 1.7
42.654335 142.026260 29.041 2018 9 7 23 20 47.200 1.8
42.567074 142.040283 29.244 2018 9 7 23 25 36.760 1.6
42.761559 142.043320 27.072 2018 9 7 23 26 50.200 1.4
42.682899 142.005569 27.858 2018 9 7 23 31 53.760 2.2
42.612938 142.006500 30.168 2018 9 7 23 35 52.800 1.3
42.596691 142.009872 30.805 2018 9 7 23 44 10.160 0.6
42.686817 142.012405 28.343 2018 9 7 23 45 20.240 1.1
42.723030 142.002823 30.677 2018 9 7 23 47 4.160 2.6
42.559696 141.964676 13.138 2018 9 7 23 49 47.400 1.0
42.599697 141.991684 28.471 2018 9 7 23 53 42.680 1.5
42.689579 141.924149 13.391 2018 9 8 0 11 22.330 1.4
42.637100 142.026459 33.190 2018 9 8 0 18 26.670 1.2
42.680210 141.923111 15.966 2018 9 8 0 21 26.020 0.8
42.601921 141.996826 28.440 2018 9 8 0 21 46.900 2.1
42.584743 142.035187 30.708 2018 9 8 0 29 13.630 2.2
42.663174 141.922638 14.000 2018 9 8 0 33 39.030 1.1
42.580723 141.998093 29.126 2018 9 8 0 41 46.930 1.4
42.674892 142.033554 28.139 2018 9 8 0 42 10.640 2.7
42.682907 142.007233 29.367 2018 9 8 0 53 52.500 1.8
42.635078 142.005234 27.797 2018 9 8 0 54 38.510 1.6
42.674091 142.006775 29.735 2018 9 8 0 58 33.780 2.3
42.803913 142.025040 29.726 2018 9 8 1 1 9.290 1.7
42.618870 141.995743 32.369 2018 9 8 1 1 30.550 0.0
42.580227 141.925705 17.791 2018 9 8 1 1 42.070 2.6
42.677635 142.009399 26.649 2018 9 8 1 4 32.280 1.3
42.675137 141.996567 26.402 2018 9 8 1 5 58.380 1.5
42.684494 142.006866 34.990 2018 9 8 1 19 8.690 0.0
42.675941 141.985489 36.495 2018 9 8 1 20 23.910 1.0
42.717407 142.048157 25.505 2018 9 8 1 28 4.670 0.0
42.667988 142.016541 30.434 2018 9 8 1 28 17.060 4.0
42.635506 142.010284 33.975 2018 9 8 1 32 24.370 1.5
42.652775 142.009735 29.914 2018 9 8 1 34 10.220 1.2
42.669796 142.022781 31.613 2018 9 8 1 35 1.800 1.6
42.648701 141.957870 13.281 2018 9 8 1 36 34.470 0.0
42.644997 142.014526 29.433 2018 9 8 1 41 10.320 1.4
42.606579 142.007431 30.033 2018 9 8 1 45 34.360 1.9
42.670475 141.989639 33.142 2018 9 8 1 49 25.460 0.9
42.606773 142.009262 30.531 2018 9 8 1 51 53.830 1.7
42.638885 142.004272 27.243 2018 9 8 1 57 56.080 0.0
42.672771 142.009460 28.586 2018 9 8 1 58 2.160 3.2
42.599846 142.003616 28.085 2018 9 8 1 59 42.520 1.6
42.598473 141.994263 29.532 2018 9 8 2 8 10.550 2.7
42.666927 141.925385 15.487 2018 9 8 2 9 28.950 1.5
42.657730 142.009186 25.856 2018 9 8 2 15 43.180 1.2
42.624535 141.939011 24.019 2018 9 8 2 19 3.990 1.4
42.619167 141.996964 24.967 2018 9 8 2 20 17.690 0.5
42.549358 142.068649 14.775 2018 9 8 2 24 32.250 2.1
42.669060 142.005066 28.826 2018 9 8 2 25 39.150 1.6
42.753014 141.944489 11.213 2018 9 8 2 44 22.330 1.3
42.593922 141.986969 27.946 2018 9 8 2 45 47.980 1.1
42.645145 142.138245 10.827 2018 9 8 2 46 58.250 0.0
42.660370 142.007248 29.167 2018 9 8 2 47 45.180 2.1
42.671299 142.012665 30.103 2018 9 8 2 51 14.370 1.6
42.619511 142.002060 29.284 2018 9 8 2 51 22.130 1.4
42.740639 141.988159 25.502 2018 9 8 2 51 47.280 1.6
42.603252 141.965332 25.926 2018 9 8 2 54 53.990 1.4
42.661022 142.007004 27.533 2018 9 8 2 58 58.370 1.3
42.609524 142.008804 25.754 2018 9 8 3 2 25.450 1.2
42.698338 142.002533 27.368 2018 9 8 3 3 6.660 1.2
42.588123 142.166077 14.299 2018 9 8 3 8 0.520 1.5
42.616627 141.914551 16.184 2018 9 8 3 8 22.530 1.3
42.702011 142.002426 22.932 2018 9 8 3 12 52.810 1.1
42.653198 142.037186 27.574 2018 9 8 3 18 18.340 1.4
42.638264 142.029465 31.649 2018 9 8 3 28 52.570 1.8
42.669987 141.987259 24.782 2018 9 8 3 38 10.030 1.6
42.729179 142.002563 26.527 2018 9 8 3 38 58.060 1.3
42.806519 142.006088 26.261 2018 9 8 3 42 30.650 1.4
42.662060 142.003540 24.486 2018 9 8 3 44 14.580 1.6
42.774929 142.001999 32.711 2018 9 8 3 46 14.070 2.0
42.681591 141.999237 27.734 2018 9 8 3 50 45.980 1.4
42.643372 141.943512 16.250 2018 9 8 3 59 12.310 1.1
42.651085 141.915009 14.368 2018 9 8 4 1 21.620 1.4
42.651115 142.030167 30.681 2018 9 8 4 8 26.980 1.2
42.554688 141.996704 21.084 2018 9 8 4 9 8.070 2.0
42.652897 142.013138 29.360 2018 9 8 4 19 4.980 1.6
42.726513 141.999786 26.632 2018 9 8 4 24 1.540 1.5
42.758694 142.022308 30.509 2018 9 8 4 26 34.540 1.4
42.802094 142.014847 28.679 2018 9 8 4 29 7.130 2.3
42.669258 141.958099 19.622 2018 9 8 4 30 27.930 1.3
42.673027 141.959167 18.988 2018 9 8 4 35 36.930 1.0
42.714970 142.033249 24.803 2018 9 8 4 37 23.190 1.3
42.721661 142.007751 32.351 2018 9 8 4 38 28.980 3.4
42.645844 141.944748 17.855 2018 9 8 4 46 18.370 1.2
42.676857 141.939514 15.957 2018 9 8 4 46 31.880 1.9
42.598911 141.987122 27.559 2018 9 8 4 50 2.510 1.1
42.601990 141.992233 27.362 2018 9 8 4 53 59.390 1.5
42.804417 142.013260 29.058 2018 9 8 4 54 33.250 1.1
42.682663 141.999756 26.587 2018 9 8 4 57 43.990 1.6
42.663921 141.903214 24.781 2018 9 8 5 1 33.170 1.3
42.782837 142.036514 16.037 2018 9 8 5 3 59.800 1.4
42.591320 141.978714 25.944 2018 9 8 5 8 13.530 2.4
42.594395 141.971786 24.668 2018 9 8 5 11 0.450 1.5
42.619064 141.985489 25.105 2018 9 8 5 12 2.130 1.2
42.639652 142.027222 34.688 2018 9 8 5 15 40.010 1.8
42.658062 142.013107 29.804 2018 9 8 5 18 13.280 1.5
42.678181 141.997360 25.145 2018 9 8 5 28 0.750 1.3
42.676807 142.001404 26.094 2018 9 8 5 30 16.740 1.5
42.613220 141.923737 17.973 2018 9 8 5 36 15.320 1.2
42.621517 142.005630 28.185 2018 9 8 5 37 30.520 3.4
42.675133 141.996948 26.902 2018 9 8 5 39 12.700 2.3
42.603008 141.995529 30.333 2018 9 8 5 49 9.170 3.6
42.641380 142.020157 26.490 2018 9 8 5 51 39.940 1.7
42.594582 142.001160 27.338 2018 9 8 5 54 10.140 1.6
42.634800 142.005692 28.843 2018 9 8 6 4 10.090 1.3
42.801266 142.010681 27.892 2018 9 8 6 25 4.420 1.3
42.592278 141.981155 28.443 2018 9 8 6 30 57.700 2.5
42.663658 141.939087 16.424 2018 9 8 6 37 40.030 1.7
42.688450 142.010590 25.119 2018 9 8 7 0 33.900 1.3
42.712013 142.003479 25.977 2018 9 8 7 1 11.530 1.1
42.623920 142.015900 25.272 2018 9 8 7 11 44.110 1.5
42.694553 142.004807 27.200 2018 9 8 7 20 44.170 1.5
42.622108 141.994095 25.037 2018 9 8 7 21 11.770 2.1
42.748356 142.005508 26.449 2018 9 8 7 23 46.240 1.1
42.655975 142.020386 27.559 2018 9 8 7 29 29.950 1.6
42.683613 142.040909 38.203 2018 9 8 7 34 26.690 1.1
42.679375 141.997986 28.707 2018 9 8 7 42 6.930 0.0
42.730118 141.995941 25.178 2018 9 8 7 42 15.530 0.0
42.673653 142.016266 28.254 2018 9 8 7 42 17.680 3.1
42.599827 142.024368 36.794 2018 9 8 7 44 46.530 0.0
42.745525 142.017410 27.303 2018 9 8 7 44 50.510 1.8
42.657146 142.021912 27.186 2018 9 8 7 46 29.280 1.7
42.653831 142.019043 33.526 2018 9 8 7 47 43.220 1.6
42.607750 142.006836 31.012 2018 9 8 7 48 50.370 1.9
42.638832 141.906937 15.212 2018 9 8 8 1 52.590 2.0
42.666519 142.031128 31.103 2018 9 8 8 3 48.400 1.9
42.570538 142.011551 29.456 2018 9 8 8 8 36.800 1.8
42.703293 141.947662 17.200 2018 9 8 8 12 39.820 1.1
42.627071 141.999985 24.408 2018 9 8 8 19 20.360 2.2
42.639832 142.029419 35.647 2018 9 8 8 19 25.430 2.2
42.615448 141.998535 23.658 2018 9 8 8 23 0.760 0.7
42.632267 141.990250 25.455 2018 9 8 8 23 28.510 1.3
42.667149 141.893555 14.584 2018 9 8 8 29 46.850 1.5
42.705990 142.016785 28.503 2018 9 8 8 30 37.710 2.0
42.789913 142.005829 25.616 2018 9 8 8 40 44.650 1.2
42.627323 142.014206 28.831 2018 9 8 8 43 0.730 2.0
42.607456 141.950714 16.418 2018 9 8 8 49 23.980 1.7
42.488701 142.024261 6.176 2018 9 8 8 51 33.460 0.9
42.702377 141.993439 32.099 2018 9 8 8 51 50.970 3.7
42.606953 142.009293 30.851 2018 9 8 8 53 33.810 2.3
42.518497 141.985641 37.283 2018 9 8 8 57 6.930 1.1
42.771400 141.989548 27.145 2018 9 8 8 57 31.160 1.3
42.788094 142.032166 26.019 2018 9 8 9 0 42.530 1.5
42.642540 141.901672 14.329 2018 9 8 9 4 56.550 1.5
42.595158 142.012680 28.707 2018 9 8 9 6 6.910 1.0
42.682693 142.020737 31.423 2018 9 8 9 11 16.550 1.8
42.605541 141.962555 16.777 2018 9 8 9 15 42.060 1.5
42.592121 142.009369 28.656 2018 9 8 9 17 6.920 1.2
42.618431 141.941544 15.576 2018 9 8 9 37 42.060 1.6
42.721535 142.000351 27.015 2018 9 8 9 39 17.160 1.7
42.666859 141.920441 15.473 2018 9 8 10 2 36.790 1.3
42.589458 141.947281 15.405 2018 9 8 10 2 58.850 1.5
42.658489 142.032822 29.666 2018 9 8 10 11 10.130 1.3
42.576145 142.009476 29.172 2018 9 8 10 13 55.000 1.0
42.630260 142.024994 32.597 2018 9 8 10 14 16.200 2.9
42.608681 141.950623 14.568 2018 9 8 10 18 41.020 1.5
42.599762 141.961990 27.715 2018 9 8 10 19 35.050 1.6
42.649715 141.920578 15.312 2018 9 8 10 22 11.130 1.4
42.714493 142.031937 22.218 2018 9 8 10 22 56.670 1.3
42.691994 142.044785 27.597 2018 9 8 10 25 58.090 1.3
42.760448 142.042160 27.531 2018 9 8 10 26 26.750 1.7
42.583248 142.004578 28.643 2018 9 8 10 35 21.940 1.6
42.653080 142.029236 28.297 2018 9 8 10 37 24.270 1.3
42.597755 142.017715 32.230 2018 9 8 10 41 20.100 1.6
42.623226 142.002151 26.360 2018 9 8 10 41 57.310 2.4
42.610889 141.997040 26.940 2018 9 8 10 43 14.090 1.6
42.642307 142.015289 28.890 2018 9 8 10 47 12.320 2.3
42.597668 142.028839 35.596 2018 9 8 10 55 58.800 1.1
42.597446 142.016815 30.795 2018 9 8 11 2 48.640 1.5
42.622341 142.008301 25.829 2018 9 8 11 18 50.340 1.6
42.588814 142.001816 30.797 2018 9 8 11 25 54.710 2.0
42.650963 142.022842 29.298 2018 9 8 11 41 28.370 1.7
42.682259 142.009674 28.892 2018 9 8 11 48 7.900 2.3
42.626003 141.984360 23.474 2018 9 8 11 55 30.340 1.5
42.692921 142.011017 29.240 2018 9 8 11 59 9.210 1.8
42.702061 141.994751 29.123 2018 9 8 12 2 25.530 2.6
42.603329 142.002228 27.794 2018 9 8 12 4 14.600 1.2
42.623207 142.007477 25.640 2018 9 8 12 14 19.520 1.6
42.644348 142.028152 27.259 2018 9 8 12 19 39.760 1.6
42.636662 141.922791 15.074 2018 9 8 12 26 14.240 1.6
42.570763 142.007034 26.091 2018 9 8 12 34 35.910 1.4
42.700619 142.008972 25.558 2018 9 8 12 39 22.930 0.8
42.574432 141.956238 18.851 2018 9 8 12 56 0.770 1.9
42.697594 142.024216 27.692 2018 9 8 12 57 9.910 0.9
42.594269 141.973816 27.959 2018 9 8 12 57 22.240 2.4
42.634602 141.929550 16.364 2018 9 8 13 3 51.160 1.5
42.598091 141.972183 26.770 2018 9 8 13 12 58.280 1.4
42.604034 141.995255 28.692 2018 9 8 13 15 25.130 1.5
42.687225 142.012146 29.851 2018 9 8 13 25 5.220 2.0
42.603210 141.996552 29.945 2018 9 8 13 26 3.960 2.5
42.667583 142.020218 33.118 2018 9 8 13 35 50.100 0.9
42.613567 141.993500 28.747 2018 9 8 13 48 44.540 1.4
42.657265 142.006348 24.348 2018 9 8 13 51 59.500 1.6
42.605717 141.996353 28.456 2018 9 8 13 53 33.020 1.9
42.792000 142.016953 30.714 2018 9 8 14 6 12.700 2.7
42.649452 141.912994 14.492 2018 9 8 14 8 36.750 1.9
42.621937 142.036865 33.225 2018 9 8 14 15 23.290 1.3
42.602531 142.014297 28.970 2018 9 8 14 30 7.050 1.4
42.738407 142.003693 28.657 2018 9 8 14 43 44.610 1.8
42.646797 141.932587 15.347 2018 9 8 14 48 27.590 1.5
42.525826 141.964233 21.896 2018 9 8 14 55 20.740 1.5
42.685081 142.021561 26.970 2018 9 8 15 4 42.520 1.8
42.595905 142.000412 29.939 2018 9 8 15 7 3.310 1.6
42.601608 141.992264 29.133 2018 9 8 15 8 54.550 0.3
42.562477 142.029144 29.612 2018 9 8 15 9 47.190 1.9
42.650417 141.917343 16.513 2018 9 8 15 14 59.190 1.1
42.634064 142.001526 30.562 2018 9 8 15 16 59.820 1.1
42.706844 142.004211 27.378 2018 9 8 15 24 53.620 1.7
42.627850 142.030472 33.489 2018 9 8 15 29 43.590 1.0
42.677944 141.933899 12.257 2018 9 8 15 30 28.190 1.3
42.679737 142.040558 24.807 2018 9 8 15 36 22.450 1.4
42.619587 141.990158 23.540 2018 9 8 15 41 12.460 1.4
42.783649 142.028641 25.768 2018 9 8 15 44 28.310 1.7
42.654419 142.019485 29.531 2018 9 8 15 45 50.960 2.3
42.698009 142.003906 27.347 2018 9 8 15 52 20.970 1.5
42.597538 141.978775 26.806 2018 9 8 15 57 23.320 1.6
42.646996 141.886200 12.416 2018 9 8 15 58 44.380 1.4
42.697437 142.012344 26.359 2018 9 8 16 3 12.320 1.2
42.607677 142.018951 30.951 2018 9 8 16 6 44.870 1.6
42.683224 142.004517 27.548 2018 9 8 16 12 55.210 1.1
42.648254 141.966797 23.421 2018 9 8 16 15 26.360 1.4
42.604614 142.013275 31.574 2018 9 8 16 18 57.760 1.7
42.664803 142.013672 28.597 2018 9 8 16 20 9.600 1.5
42.692547 141.988892 34.399 2018 9 8 16 21 36.490 4.0
42.681545 142.012939 28.763 2018 9 8 16 31 53.770 1.1
42.643055 142.011414 28.905 2018 9 8 16 32 40.510 1.1
42.615330 142.004761 26.776 2018 9 8 16 36 4.360 3.3
42.684284 142.006729 30.091 2018 9 8 16 38 54.500 2.7
42.685848 142.000961 34.496 2018 9 8 16 39 39.040 1.9
42.620552 141.903580 10.585 2018 9 8 16 50 29.360 1.6
42.692642 141.997055 27.147 2018 9 8 16 54 15.190 1.8
42.526249 141.993164 11.463 2018 9 8 16 55 46.990 1.1
42.590000 141.986862 27.900 2018 9 8 17 3 56.240 3.4
42.636795 142.019958 28.582 2018 9 8 17 5 40.580 1.8
42.782761 141.933029 16.898 2018 9 8 17 10 40.740 1.8
42.692501 142.002243 24.399 2018 9 8 17 19 14.060 1.5
42.712261 142.011734 26.032 2018 9 8 17 20 55.600 1.4
42.598572 141.998749 28.919 2018 9 8 17 23 52.700 1.5
42.712410 142.011917 27.682 2018 9 8 17 32 4.240 1.2
42.587894 141.967163 25.957 2018 9 8 17 35 27.840 2.3
42.660011 141.947952 17.923 2018 9 8 17 37 36.260 1.5
42.726391 141.878067 20.449 2018 9 8 17 38 28.760 1.2
42.669102 142.004257 30.780 2018 9 8 17 46 32.040 1.0
42.691345 141.994675 26.897 2018 9 8 17 55 52.080 1.0
42.683815 141.995224 25.454 2018 9 8 17 57 11.300 0.9
42.724522 142.007355 27.577 2018 9 8 18 2 10.140 1.1
42.492424 141.962311 14.689 2018 9 8 18 7 11.680 1.2
42.572605 142.027603 30.016 2018 9 8 18 7 55.160 1.5
42.634380 142.021317 26.745 2018 9 8 18 12 22.200 1.6
42.600426 141.995789 29.423 2018 9 8 18 15 23.300 1.9
42.604309 142.009735 29.645 2018 9 8 18 20 2.840 0.7
42.730095 141.955414 10.476 2018 9 8 18 20 43.800 0.8
42.686096 141.998459 29.978 2018 9 8 18 21 6.500 4.2
42.646927 142.035965 29.713 2018 9 8 18 24 18.580 1.5
42.679295 141.925781 13.194 2018 9 8 18 26 38.240 0.0
42.604095 142.005325 30.375 2018 9 8 18 27 53.980 2.3
42.649956 141.969360 30.856 2018 9 8 18 31 31.360 1.2
42.631229 142.001160 25.383 2018 9 8 18 34 42.120 1.4
42.780758 141.937881 16.734 2018 9 8 18 36 53.040 1.2
42.607807 141.998764 29.448 2018 9 8 18 38 55.080 1.3
42.688950 142.000412 27.268 2018 9 8 18 40 56.560 1.3
42.524788 142.060715 12.674 2018 9 8 18 47 11.120 2.0
42.657452 142.019531 31.478 2018 9 8 18 49 14.160 1.4
42.722881 141.999298 29.395 2018 9 8 18 51 27.160 1.7
42.652096 141.974869 20.897 2018 9 8 18 54 26.280 1.6
42.719799 142.018616 28.341 2018 9 8 18 55 8.080 1.2
42.607075 141.936249 16.240 2018 9 8 18 58 47.920 1.5
42.602070 142.018127 29.720 2018 9 8 19 3 27.200 1.5
42.689682 142.011597 29.030 2018 9 8 19 8 0.160 1.8
42.669991 141.918930 14.110 2018 9 8 19 13 54.720 1.0
42.675594 142.011124 30.990 2018 9 8 19 16 38.240 3.1
42.663593 142.012924 27.237 2018 9 8 19 26 26.760 1.2
42.620079 141.992920 24.818 2018 9 8 19 29 45.540 2.2
42.650066 141.989929 28.457 2018 9 8 19 31 57.900 1.1
42.624828 142.008484 26.226 2018 9 8 19 36 1.940 0.7
42.618183 142.027359 31.183 2018 9 8 19 36 47.360 0.9
42.601494 142.005905 31.276 2018 9 8 19 45 21.820 1.1
42.655674 142.007263 27.247 2018 9 8 19 46 18.200 1.1
42.673157 141.923492 12.652 2018 9 8 19 50 51.420 1.1
42.662186 142.031693 29.618 2018 9 8 19 53 22.360 1.8
42.584415 142.028976 26.248 2018 9 8 19 56 45.680 1.0
42.591644 141.993454 26.148 2018 9 8 20 9 37.240 0.8
42.582699 142.046936 28.096 2018 9 8 20 12 2.380 1.2
42.691250 141.910950 23.312 2018 9 8 20 15 17.360 0.9
42.659435 142.025391 26.202 2018 9 8 20 19 26.040 1.0
42.653652 142.037094 28.945 2018 9 8 20 23 19.420 1.5
42.816212 142.001648 29.897 2018 9 8 20 32 13.120 0.8
42.609993 142.017136 31.790 2018 9 8 20 36 4.640 1.2
42.621227 142.034576 17.620 2018 9 8 20 46 20.400 1.1
42.532375 141.957108 17.304 2018 9 8 20 55 32.440 0.8
42.676411 141.926346 16.920 2018 9 8 21 0 37.560 3.2
42.673290 141.930664 13.375 2018 9 8 21 2 58.180 0.9
42.623722 141.878479 20.418 2018 9 8 21 2 59.840 0.0
42.675991 141.928818 16.605 2018 9 8 21 3 59.280 2.4
42.687859 142.007980 28.603 2018 9 8 21 4 43.120 1.5
42.660305 142.018936 28.169 2018 9 8 21 6 1.120 1.4
42.613403 142.000351 29.175 2018 9 8 21 14 6.400 1.3
42.744774 141.947449 19.202 2018 9 8 21 15 23.800 1.1
42.663654 142.029175 33.374 2018 9 8 21 15 38.080 1.2
42.632294 141.915039 13.757 2018 9 8 21 19 4.880 0.6
42.590626 142.016937 29.285 2018 9 8 21 19 20.480 2.2
42.600761 141.922806 14.827 2018 9 8 21 20 47.480 1.3
42.719933 141.881729 12.645 2018 9 8 21 21 41.060 1.2
42.673084 141.921631 14.345 2018 9 8 21 22 31.760 0.8
42.658306 141.926361 14.419 2018 9 8 21 23 20.280 1.3
42.700069 142.000229 32.243 2018 9 8 21 24 20.160 0.9
42.632008 142.032150 31.336 2018 9 8 21 27 57.240 1.4
42.562927 142.036453 28.266 2018 9 8 21 31 22.780 1.4
42.665730 141.917160 15.468 2018 9 8 21 33 20.560 0.9
42.666466 141.923355 15.162 2018 9 8 21 33 27.960 1.1
42.575180 141.987091 25.191 2018 9 8 21 37 25.700 1.7
42.603447 141.992935 29.959 2018 9 8 21 40 20.960 0.3
42.675098 141.920563 14.893 2018 9 8 21 40 49.720 1.0
42.680420 142.008347 29.110 2018 9 8 21 41 21.460 2.2
42.671810 141.917023 15.014 2018 9 8 21 42 21.700 1.6
42.577129 141.955994 21.249 2018 9 8 21 44 44.480 0.0
42.641960 141.989655 25.232 2018 9 8 21 45 12.200 0.7
42.632156 141.916840 16.636 2018 9 8 21 45 23.000 0.9
42.746319 142.021011 29.073 2018 9 8 21 52 37.080 0.8
42.564804 141.999207 26.784 2018 9 8 21 53 53.840 0.9
42.683037 141.999893 28.660 2018 9 8 21 55 39.900 2.3
42.716965 141.911469 28.440 2018 9 8 21 58 8.480 0.3
42.527706 141.960129 20.110 2018 9 8 22 3 55.320 1.0
42.826176 141.909515 10.614 2018 9 8 22 11 59.440 0.8
42.825523 141.914185 12.289 2018 9 8 22 17 17.920 0.9
42.469948 142.069733 14.422 2018 9 8 22 24 21.680 1.0
42.676910 141.925598 13.867 2018 9 8 22 25 15.660 0.6
42.678619 141.916641 12.542 2018 9 8 22 29 42.320 0.8
42.577072 141.967712 22.718 2018 9 8 22 33 47.500 1.6
42.676033 141.927200 16.183 2018 9 8 22 37 10.200 2.6
42.702377 142.004807 28.569 2018 9 8 22 39 52.520 1.5
42.668987 142.011734 27.148 2018 9 8 22 40 41.500 1.2
42.616806 141.880524 10.685 2018 9 8 22 44 42.360 0.9
42.597702 141.984314 26.543 2018 9 8 22 45 25.480 0.7
42.647472 142.032867 32.384 2018 9 8 22 50 4.320 2.1
42.679573 141.935028 11.379 2018 9 8 22 50 49.720 1.4
42.777748 142.022156 29.378 2018 9 8 22 53 42.160 0.8
42.750286 141.903854 13.366 2018 9 8 22 59 15.000 1.4
42.623642 142.013062 28.395 2018 9 8 23 0 42.980 2.9
42.566280 141.952774 17.475 2018 9 8 23 5 47.140 1.4
42.673527 142.001404 28.145 2018 9 8 23 6 17.280 0.0
42.608971 141.951477 16.869 2018 9 8 23 6 42.760 1.1
42.633751 141.980698 22.411 2018 9 8 23 10 52.840 1.1
42.772034 142.031311 29.657 2018 9 8 23 11 52.160 3.6
42.649464 142.021439 29.549 2018 9 8 23 17 54.720 0.6
42.663826 141.996185 31.423 2018 9 8 23 26 57.400 0.0
42.559162 142.031326 28.989 2018 9 8 23 28 4.740 1.1
42.718925 141.950470 15.662 2018 9 8 23 28 20.880 1.4
42.648991 142.020935 30.841 2018 9 8 23 35 28.640 0.0
42.560043 141.942139 18.896 2018 9 8 23 36 24.140 0.8
42.669476 142.011154 36.373 2018 9 8 23 49 27.200 1.5
42.602383 141.995132 28.107 2018 9 8 23 53 12.240 0.7
42.772614 142.014755 32.905 2018 9 8 23 55 44.160 0.9
42.571316 141.995316 25.187 2018 9 8 23 56 36.400 1.1
42.582859 141.990463 27.579 2018 9 8 23 58 48.960 0.7
42.682728 142.002304 26.919 2018 9 9 0 5 3.930 1.3
42.510197 142.074570 11.169 2018 9 9 0 7 37.570 0.9
42.615097 142.039429 36.548 2018 9 9 0 10 12.210 1.1
42.715557 141.942139 15.181 2018 9 9 0 11 45.730 1.2
42.671516 141.990997 18.865 2018 9 9 0 12 18.110 0.5
42.587471 141.975555 31.152 2018 9 9 0 14 13.870 0.5
42.700787 141.936066 17.459 2018 9 9 0 14 46.920 0.9
42.674274 141.914566 13.982 2018 9 9 0 16 28.130 1.1
42.510994 142.072708 11.330 2018 9 9 0 19 24.440 0.9
42.673855 141.933304 12.659 2018 9 9 0 21 55.530 0.5
42.801109 142.000092 28.676 2018 9 9 0 28 28.090 0.9
42.552517 141.970840 34.654 2018 9 9 0 29 24.490 0.7
42.683048 142.008698 29.020 2018 9 9 0 32 30.590 1.8
42.684200 142.002274 28.943 2018 9 9 0 35 29.920 1.0
42.639347 141.908936 15.823 2018 9 9 0 37 43.610 1.6
42.617199 142.014053 29.310 2018 9 9 0 39 31.980 1.9
42.655460 141.930542 15.657 2018 9 9 0 40 12.180 1.2
42.699062 142.004654 31.460 2018 9 9 0 43 23.590 0.7
42.694099 142.005890 25.857 2018 9 9 0 45 3.750 1.0
42.672054 142.009262 32.277 2018 9 9 0 49 13.260 1.5
42.680099 141.971619 24.763 2018 9 9 0 50 30.210 1.1
42.626026 142.015060 28.365 2018 9 9 0 54 1.740 1.4
42.533573 142.004013 28.360 2018 9 9 0 55 56.380 1.0
42.602989 142.015350 29.983 2018 9 9 0 59 8.600 1.4
42.645447 142.050461 33.650 2018 9 9 1 2 25.160 1.0
42.615700 141.902710 21.411 2018 9 9 1 3 27.940 0.7
42.655884 142.000229 32.064 2018 9 9 1 6 9.140 1.0
42.599083 142.043457 12.278 2018 9 9 1 14 45.330 1.6
42.659477 141.931137 14.632 2018 9 9 1 16 46.060 1.0
42.593147 142.014969 27.717 2018 9 9 1 23 47.430 0.9
42.617012 141.995514 26.686 2018 9 9 1 24 46.260 1.7
42.622322 141.897598 18.672 2018 9 9 1 26 38.540 0.0
42.696537 141.979431 31.865 2018 9 9 1 30 2.470 0.7
42.654560 141.983139 22.245 2018 9 9 1 31 10.790 0.8
42.573303 141.960983 23.663 2018 9 9 1 36 20.990 0.8
42.648212 142.025253 24.864 2018 9 9 1 38 29.850 0.9
42.625622 141.940857 26.554 2018 9 9 1 39 55.730 0.0
42.665688 142.006668 26.537 2018 9 9 1 43 32.960 0.8
42.659893 141.999008 26.841 2018 9 9 1 45 0.370 0.2
42.579517 141.884384 13.363 2018 9 9 2 0 10.240 1.0
42.664368 142.011978 27.437 2018 9 9 2 1 0.400 1.4
42.687916 141.957291 27.096 2018 9 9 2 1 23.770 1.0
42.681221 141.995880 24.746 2018 9 9 2 3 31.870 1.0
42.658333 142.023514 34.721 2018 9 9 2 4 43.010 0.0
42.650185 142.019211 31.703 2018 9 9 2 8 15.310 1.4
42.596573 141.985092 28.236 2018 9 9 2 12 36.540 2.3
42.639080 142.036041 33.307 2018 9 9 2 14 48.390 1.0
42.638237 142.025787 29.742 2018 9 9 2 19 38.490 1.9
42.624718 142.010971 29.459 2018 9 9 2 25 19.550 3.3
42.609909 142.013336 29.342 2018 9 9 2 26 51.730 1.4
42.619690 141.985336 31.479 2018 9 9 2 28 2.320 0.0
42.681801 141.914246 15.186 2018 9 9 2 28 11.470 0.7
42.587563 141.983658 25.430 2018 9 9 2 30 13.510 0.6
42.632011 142.030594 30.721 2018 9 9 2 30 51.470 0.9
42.707787 141.986465 22.050 2018 9 9 2 33 34.540 0.7
42.560760 141.946304 30.268 2018 9 9 2 36 20.280 0.0
42.675037 141.908417 13.903 2018 9 9 2 38 59.640 0.7
42.683121 141.984192 23.449 2018 9 9 2 39 55.300 0.0
42.665497 142.000504 25.051 2018 9 9 2 40 46.950 1.3
42.665466 142.016083 28.146 2018 9 9 2 45 3.660 1.5
42.747017 141.989700 28.415 2018 9 9 2 45 37.180 0.8
42.622303 142.022079 29.996 2018 9 9 2 45 56.280 1.0
42.690456 142.005219 27.568 2018 9 9 2 46 41.130 1.2
42.595161 141.960098 27.286 2018 9 9 2 50 23.400 0.4
42.700207 141.999054 30.153 2018 9 9 2 50 47.850 2.3
42.718170 141.998825 27.927 2018 9 9 2 56 37.290 1.0
42.778927 142.022247 28.839 2018 9 9 2 59 36.150 1.5
42.801414 142.010574 28.451 2018 9 9 3 2 4.770 0.8
42.763241 142.016373 28.806 2018 9 9 3 9 52.310 1.3
42.716061 142.029526 27.820 2018 9 9 3 12 23.920 4.1
42.720680 142.008591 27.617 2018 9 9 3 15 29.150 1.3
42.670105 142.014191 29.837 2018 9 9 3 22 38.050 0.8
42.603634 141.948639 37.306 2018 9 9 3 25 23.690 0.8
42.670574 142.012543 28.533 2018 9 9 3 26 52.390 2.4
42.721508 141.900757 15.870 2018 9 9 3 33 40.250 0.9
42.641949 142.016281 30.611 2018 9 9 3 35 56.270 1.1
42.658489 141.957153 11.677 2018 9 9 3 36 22.510 1.0
42.741367 142.022644 35.567 2018 9 9 3 36 51.370 0.9
42.758602 142.017044 26.779 2018 9 9 3 38 19.410 1.0
42.630573 142.021286 35.008 2018 9 9 3 40 22.910 0.8
42.670895 142.015976 31.904 2018 9 9 3 40 45.830 1.2
42.668056 142.020645 31.897 2018 9 9 3 41 1.840 1.9
42.620804 141.942719 15.341 2018 9 9 3 43 46.370 1.2
42.622551 141.973892 29.323 2018 9 9 3 47 51.420 0.8
42.783245 142.034317 26.546 2018 9 9 3 49 35.420 1.4
42.612251 142.087509 34.222 2018 9 9 3 55 23.990 2.0
42.645439 141.928497 15.026 2018 9 9 3 56 3.670 2.4
42.612164 142.011826 35.284 2018 9 9 3 58 30.370 0.8
42.651844 142.025299 30.614 2018 9 9 4 1 40.650 0.8
42.597454 141.973984 26.344 2018 9 9 4 2 42.390 1.2
42.728519 142.015701 27.459 2018 9 9 4 4 2.410 0.8
42.633659 141.927322 15.796 2018 9 9 4 9 52.070 1.1
42.674770 142.003311 32.116 2018 9 9 4 11 1.140 0.7
42.664177 141.995483 33.757 2018 9 9 4 17 57.460 0.6
42.672188 141.997208 25.133 2018 9 9 4 19 23.370 1.3
42.627140 141.941681 15.157 2018 9 9 4 19 53.650 1.3
42.623947 141.997345 26.426 2018 9 9 4 20 33.640 2.2
42.662422 142.016479 30.802 2018 9 9 4 22 15.050 0.6
42.669399 141.929092 14.076 2018 9 9 4 26 56.450 0.9
42.663967 142.014999 30.872 2018 9 9 4 29 32.370 0.2
42.621506 142.022247 27.914 2018 9 9 4 32 51.010 1.1
42.656322 141.931030 14.335 2018 9 9 4 33 21.960 0.7
42.592648 142.007690 32.625 2018 9 9 4 35 27.680 1.0
42.605553 142.002197 29.374 2018 9 9 4 48 23.220 1.3
42.619503 141.998962 26.201 2018 9 9 4 54 35.070 3.0
42.684887 141.925827 15.061 2018 9 9 4 57 31.500 1.2
42.687626 142.009094 29.002 2018 9 9 5 6 50.110 1.6
42.698132 142.033997 26.697 2018 9 9 5 24 40.180 2.4
42.605339 141.939133 16.974 2018 9 9 5 28 44.990 2.6
42.588009 141.989594 29.177 2018 9 9 5 29 30.980 1.8
42.733528 142.014145 29.104 2018 9 9 5 30 35.250 1.8
42.588261 141.892532 20.814 2018 9 9 5 31 37.850 1.1
42.600605 141.936188 16.089 2018 9 9 5 33 28.540 1.4
42.654118 141.988205 25.094 2018 9 9 5 49 58.980 1.2
42.678856 141.965088 22.974 2018 9 9 5 50 22.850 0.9
42.801567 142.007202 30.145 2018 9 9 5 51 56.660 0.7
42.634270 141.974030 9.199 2018 9 9 5 56 32.860 0.5
42.624504 142.021072 32.589 2018 9 9 5 56 50.580 2.1
42.620796 141.919495 14.349 2018 9 9 5 57 44.270 1.2
42.761444 142.035339 29.803 2018 9 9 6 0 47.510 0.8
42.593285 142.012039 27.094 2018 9 9 6 3 53.580 1.3
42.668095 142.002701 28.787 2018 9 9 6 6 35.840 1.0
42.693001 141.997375 28.623 2018 9 9 6 8 1.960 0.3
42.675041 141.921890 17.199 2018 9 9 6 10 34.810 3.0
42.697166 142.015045 24.827 2018 9 9 6 20 1.700 0.7
42.602375 141.998398 28.933 2018 9 9 6 22 13.940 1.1
42.562160 141.850845 28.229 2018 9 9 6 23 34.500 1.5
42.668793 142.006226 26.425 2018 9 9 6 30 19.970 0.9
42.685371 141.995667 28.886 2018 9 9 6 31 10.590 2.7
42.661530 142.011658 32.351 2018 9 9 6 45 41.680 0.9
42.656063 141.932419 14.835 2018 9 9 6 50 44.910 1.3
42.655983 142.031509 23.414 2018 9 9 6 52 14.970 0.8
42.599312 142.004074 32.293 2018 9 9 6 53 34.520 1.1
42.665257 141.976364 25.591 2018 9 9 7 3 28.030 0.0
42.648438 142.008667 25.595 2018 9 9 7 3 56.620 1.3
42.628952 142.031372 30.302 2018 9 9 7 11 14.810 0.9
42.618706 141.990311 28.228 2018 9 9 7 22 11.660 0.4
42.726498 141.894669 11.883 2018 9 9 7 22 41.700 0.8
42.656616 142.014664 30.581 2018 9 9 7 27 42.550 1.2
42.680267 142.008041 24.886 2018 9 9 7 31 17.580 1.2
42.675686 142.012512 28.435 2018 9 9 7 32 32.350 1.2
42.669220 142.012024 28.312 2018 9 9 7 41 45.840 2.3
42.667873 141.994843 26.746 2018 9 9 7 46 54.830 0.8
42.666428 142.000198 28.581 2018 9 9 7 47 3.720 1.1
42.603626 141.991974 26.753 2018 9 9 7 49 46.740 1.2
42.675285 141.860458 23.847 2018 9 9 7 54 29.240 0.7
42.729343 141.925613 11.945 2018 9 9 7 55 13.270 1.4
42.736996 142.031616 26.657 2018 9 9 8 2 52.260 0.6
42.693428 142.002151 24.612 2018 9 9 8 7 30.500 0.6
42.646000 141.942902 15.338 2018 9 9 8 7 45.970 1.0
42.611481 141.984940 24.778 2018 9 9 8 9 7.160 1.8
42.602314 141.926224 15.795 2018 9 9 8 12 7.240 1.1
42.605339 141.929932 15.852 2018 9 9 8 25 43.830 0.9
42.778095 142.019470 29.481 2018 9 9 8 28 28.470 1.9
42.670448 141.995468 27.344 2018 9 9 8 30 36.150 2.3
42.593258 141.992477 29.648 2018 9 9 8 36 30.980 0.9
42.645012 141.907959 14.414 2018 9 9 8 42 39.990 0.6
42.649769 142.024933 26.351 2018 9 9 8 56 34.450 1.1
42.683136 142.012909 27.132 2018 9 9 9 9 58.110 0.6
42.658005 142.002182 27.093 2018 9 9 9 12 39.570 0.6
42.703964 141.992401 30.541 2018 9 9 9 22 54.700 0.9
42.709686 142.002991 26.896 2018 9 9 9 26 20.660 1.0
42.791893 142.031525 23.999 2018 9 9 9 35 1.970 1.0
42.607513 141.982666 23.116 2018 9 9 9 38 36.520 2.4
42.677299 142.015457 28.284 2018 9 9 9 39 51.940 1.7
42.677444 142.013474 25.769 2018 9 9 9 42 48.130 1.1
42.675995 142.009232 28.973 2018 9 9 9 45 7.930 1.2
42.676208 142.017242 28.305 2018 9 9 9 47 10.890 1.6
42.615746 142.022659 30.668 2018 9 9 9 56 25.880 1.3
42.734859 141.949829 19.684 2018 9 9 10 5 30.900 0.8
42.734882 141.992355 21.909 2018 9 9 10 8 27.560 0.5
42.660297 142.029282 31.367 2018 9 9 10 11 50.520 0.6
42.701481 142.025421 29.863 2018 9 9 10 20 53.350 0.9
42.601627 141.982239 26.091 2018 9 9 10 22 21.640 0.7
42.714943 142.012421 27.755 2018 9 9 10 30 24.820 1.3
42.637432 141.996933 22.611 2018 9 9 10 39 9.070 1.1
42.588879 142.059662 12.702 2018 9 9 10 48 4.960 1.5
42.586590 141.974304 24.476 2018 9 9 10 55 56.370 1.0
42.621323 142.010712 28.836 2018 9 9 11 10 55.770 2.0
42.807156 142.007523 28.901 2018 9 9 11 26 45.870 1.1
42.668072 142.011185 28.991 2018 9 9 11 43 36.290 2.1
42.652275 142.020157 28.076 2018 9 9 11 45 34.180 2.2
42.546070 141.977005 16.014 2018 9 9 11 50 0.170 0.7
42.740070 141.874344 13.292 2018 9 9 11 56 31.930 0.9
42.750931 141.960709 16.053 2018 9 9 12 2 46.630 0.8
42.600628 142.003830 35.613 2018 9 9 12 19 31.390 0.3
42.597359 142.004547 30.643 2018 9 9 12 20 53.790 1.1
42.581406 141.992966 23.510 2018 9 9 12 34 28.990 1.0
42.672707 141.939102 14.680 2018 9 9 12 35 26.040 1.3
42.778831 142.034256 29.681 2018 9 9 12 42 34.120 1.2
42.659664 142.017944 29.204 2018 9 9 12 42 45.550 3.4
42.829693 141.911041 10.984 2018 9 9 12 48 35.500 0.8
42.573486 141.994400 28.967 2018 9 9 12 49 2.490 0.9
42.721432 141.999649 30.029 2018 9 9 12 49 13.340 3.0
42.664803 142.017090 27.969 2018 9 9 12 54 55.730 1.2
42.714859 142.023071 27.500 2018 9 9 13 0 56.230 1.2
42.656235 142.027176 32.816 2018 9 9 13 12 12.310 2.3
42.677494 141.921066 14.312 2018 9 9 13 23 21.000 1.1
42.747364 142.003876 28.778 2018 9 9 13 42 0.250 0.7
42.602032 142.013077 30.070 2018 9 9 13 44 30.820 0.4
42.654156 142.004410 24.942 2018 9 9 13 57 33.830 1.0
42.645130 141.936157 14.221 2018 9 9 13 58 4.830 0.7
42.673565 141.887451 20.484 2018 9 9 14 2 37.300 0.7
42.720314 141.991226 30.455 2018 9 9 14 4 56.180 1.1
42.624722 141.988388 24.167 2018 9 9 14 19 26.460 0.9
42.745502 142.018417 26.320 2018 9 9 14 24 14.780 0.7
42.558971 141.994141 25.642 2018 9 9 14 26 47.170 1.0
42.669659 142.004379 27.189 2018 9 9 14 27 19.170 1.0
42.621056 142.025528 29.759 2018 9 9 14 40 54.460 1.5
42.614769 142.002762 29.098 2018 9 9 14 43 7.030 0.7
42.638149 142.024307 26.635 2018 9 9 14 56 48.570 0.7
42.642899 141.948044 16.156 2018 9 9 15 1 31.720 1.2
42.680256 142.007614 26.870 2018 9 9 15 9 48.960 2.2
42.804054 142.011826 26.805 2018 9 9 15 11 29.490 1.5
42.667835 141.923279 18.907 2018 9 9 15 28 10.030 1.4
42.706818 142.011353 27.357 2018 9 9 15 28 54.440 1.4
42.699341 141.885620 15.617 2018 9 9 15 32 9.420 1.2
42.718498 141.888290 12.649 2018 9 9 15 33 6.330 1.0
42.620388 141.999710 24.560 2018 9 9 15 39 36.920 0.9
42.587505 142.021194 30.041 2018 9 9 15 41 52.230 1.0
42.670902 141.867767 24.374 2018 9 9 15 42 10.850 1.2
42.715881 142.007828 27.864 2018 9 9 15 44 11.130 1.9
42.613476 142.011337 26.902 2018 9 9 15 48 45.790 0.6
42.598042 141.990570 30.186 2018 9 9 16 7 12.620 1.1
42.806828 142.018173 26.624 2018 9 9 16 11 12.650 0.4
42.700241 141.993362 30.946 2018 9 9 16 11 49.930 1.2
42.662437 141.979767 21.037 2018 9 9 16 15 58.220 0.4
42.677551 141.910461 18.546 2018 9 9 16 25 24.000 0.7
42.683548 142.010605 28.271 2018 9 9 16 34 13.740 0.5
42.726582 142.022446 28.814 2018 9 9 16 35 36.370 0.9
42.668716 142.008820 31.621 2018 9 9 16 47 22.110 0.2
42.664394 142.005142 29.185 2018 9 9 16 50 15.230 1.0
42.685875 142.007797 26.799 2018 9 9 16 56 35.970 1.1
42.654377 142.023010 25.888 2018 9 9 16 58 50.220 0.6
42.649300 142.027084 33.856 2018 9 9 17 3 55.440 0.5
42.650002 142.016342 28.396 2018 9 9 17 9 16.600 2.2
42.656738 142.020004 29.164 2018 9 9 17 24 44.840 1.5
42.690655 142.010880 27.685 2018 9 9 17 35 19.120 0.9
42.665058 141.948517 26.996 2018 9 9 17 43 10.360 1.3
42.612511 141.996887 24.898 2018 9 9 17 53 2.360 0.9
42.721695 142.165741 31.726 2018 9 9 17 59 26.280 0.7
42.604660 141.995209 29.897 2018 9 9 18 5 11.640 2.8
42.647125 142.020966 27.682 2018 9 9 18 7 45.560 0.8
42.654587 142.019318 28.021 2018 9 9 18 9 2.800 1.1
42.461151 141.927155 5.837 2018 9 9 18 11 46.060 1.1
42.606846 141.998428 30.740 2018 9 9 18 16 41.280 3.2
42.717846 142.153961 31.119 2018 9 9 18 25 19.120 0.8
42.675705 141.923920 16.514 2018 9 9 18 28 12.200 2.4
42.675041 141.929718 13.653 2018 9 9 18 30 55.440 0.6
42.661484 142.008438 26.316 2018 9 9 18 33 55.600 0.8
42.593548 142.012085 29.853 2018 9 9 18 35 14.820 1.9
42.663563 141.957306 19.775 2018 9 9 18 37 7.880 0.7
42.684490 141.912720 17.305 2018 9 9 18 37 52.280 0.6
42.613514 142.004623 28.262 2018 9 9 18 39 43.020 1.6
42.666096 141.924530 15.195 2018 9 9 18 42 57.960 0.4
42.716885 142.002579 25.687 2018 9 9 18 48 30.280 0.9
42.737324 141.900604 16.044 2018 9 9 18 51 41.520 0.0
42.720695 142.020248 32.690 2018 9 9 19 1 13.160 0.4
42.578022 141.993362 31.163 2018 9 9 19 2 45.720 1.1
42.658524 141.947433 15.388 2018 9 9 19 3 30.040 1.2
42.641319 141.948013 13.493 2018 9 9 19 6 43.640 0.3
42.772003 142.021210 28.983 2018 9 9 19 6 54.680 0.7
42.708523 142.149490 31.357 2018 9 9 19 8 10.360 0.7
42.672756 142.001007 25.997 2018 9 9 19 12 58.680 0.7
42.689079 142.000565 27.876 2018 9 9 19 15 44.560 1.9
42.643692 141.964355 26.666 2018 9 9 19 19 50.320 0.1
42.735744 141.911987 15.324 2018 9 9 19 20 12.800 1.5
42.680531 141.977280 23.716 2018 9 9 19 26 26.120 0.6
42.535946 141.952347 28.237 2018 9 9 19 29 3.640 0.0
42.713600 142.011749 27.700 2018 9 9 19 29 30.580 0.2
42.681599 142.016434 30.071 2018 9 9 19 30 17.360 0.5
42.601551 141.978973 25.518 2018 9 9 19 30 59.520 0.9
42.529610 141.851807 30.734 2018 9 9 19 31 36.780 0.0
42.828751 141.919861 11.393 2018 9 9 19 36 57.840 0.9
42.675930 141.920609 15.196 2018 9 9 19 37 50.320 1.2
42.790176 141.904892 24.918 2018 9 9 19 39 30.840 0.5
42.431686 141.957275 10.369 2018 9 9 19 39 53.180 1.0
42.585026 142.002472 20.398 2018 9 9 19 48 36.020 0.9
42.681965 142.010696 29.400 2018 9 9 19 58 35.800 0.9
42.677341 141.928406 17.555 2018 9 9 19 59 33.780 0.0
42.664574 141.855530 24.428 2018 9 9 20 2 36.620 1.3
42.725792 142.011307 29.199 2018 9 9 20 12 55.680 1.7
42.768116 142.045303 30.041 2018 9 9 20 20 13.900 1.0
42.807896 142.001633 30.043 2018 9 9 20 27 54.960 0.1
42.605125 141.992035 31.190 2018 9 9 20 28 45.240 0.0
42.675529 141.999512 27.920 2018 9 9 20 29 19.340 0.7
42.682674 142.018387 30.818 2018 9 9 20 32 21.280 0.7
42.705387 142.007538 28.631 2018 9 9 20 35 42.080 1.0
42.687935 141.993774 25.375 2018 9 9 20 37 24.320 0.7
42.674122 141.925079 13.954 2018 9 9 20 37 40.340 0.9
42.695663 141.999573 29.648 2018 9 9 20 46 7.220 2.5
42.728256 142.006577 26.056 2018 9 9 20 50 29.120 1.3
42.694588 142.005875 27.127 2018 9 9 21 2 2.340 0.8
42.601849 142.002991 28.359 2018 9 9 21 5 45.120 0.8
42.689419 142.002869 28.675 2018 9 9 21 6 5.580 2.5
42.645046 141.952271 15.775 2018 9 9 21 22 16.540 1.2
42.589554 142.040756 32.045 2018 9 9 21 25 11.040 0.9
42.747223 142.007568 28.258 2018 9 9 21 39 24.340 0.9
42.690243 141.905823 14.740 2018 9 9 21 44 55.880 0.5
42.651176 141.937225 13.048 2018 9 9 21 50 26.000 0.0
42.600334 142.007538 29.606 2018 9 9 21 56 31.400 2.5
42.661110 141.933395 15.632 2018 9 9 21 57 52.880 1.3
42.796410 142.015198 27.309 2018 9 9 22 6 37.940 1.0
42.792263 142.021332 29.424 2018 9 9 22 7 46.160 2.6
42.606968 141.980530 26.039 2018 9 9 22 14 48.920 1.2
42.812130 142.004990 29.072 2018 9 9 22 18 29.560 0.4
42.595821 141.976471 25.154 2018 9 9 22 19 31.280 0.9
42.638435 141.937790 16.774 2018 9 9 22 22 56.200 1.9
42.687435 141.922791 15.715 2018 9 9 22 24 24.840 0.0
42.640160 141.932648 15.809 2018 9 9 22 27 16.580 1.3
42.697971 142.029327 29.941 2018 9 9 22 51 35.880 0.1
42.661572 142.028763 32.347 2018 9 9 22 54 50.880 0.3
42.770313 142.006546 30.487 2018 9 9 22 55 13.240 4.9
42.628147 142.020370 28.994 2018 9 9 22 57 47.200 0.0
42.656933 142.015854 31.563 2018 9 9 23 1 46.200 0.9
42.677731 141.924164 14.875 2018 9 9 23 6 40.420 0.5
42.636360 142.045578 33.751 2018 9 9 23 7 3.680 0.9
42.659626 141.897064 9.782 2018 9 9 23 10 31.840 0.1
42.687702 141.951004 20.768 2018 9 9 23 11 19.580 0.2
42.773266 142.012192 28.550 2018 9 9 23 14 4.240 0.8
42.622955 141.859909 18.658 2018 9 9 23 14 31.800 0.8
42.692303 141.950851 20.346 2018 9 9 23 15 6.320 0.3
42.586308 141.976807 25.571 2018 9 9 23 15 56.760 0.8
42.763832 141.989594 34.475 2018 9 9 23 19 40.760 0.4
42.770313 141.999268 28.794 2018 9 9 23 22 19.720 0.4
42.793098 141.966965 30.034 2018 9 9 23 23 32.080 0.4
42.604420 142.019440 31.567 2018 9 9 23 32 2.320 1.4
42.680393 141.997803 34.456 2018 9 9 23 33 5.140 0.8
42.769558 142.007080 28.839 2018 9 9 23 36 4.320 1.2
42.661610 141.851791 20.841 2018 9 9 23 37 47.660 0.7
42.588455 141.974014 25.571 2018 9 9 23 44 13.480 0.6
42.566074 141.994980 27.809 2018 9 9 23 46 30.320 1.1
42.674099 142.023773 27.562 2018 9 9 23 49 13.320 1.7
42.657013 142.002243 25.542 2018 9 9 23 51 35.240 1.3
42.770821 142.011826 30.252 2018 9 10 0 5 54.780 1.0
42.671333 142.025909 32.019 2018 9 10 0 18 31.860 0.5
42.659290 142.032349 31.205 2018 9 10 0 25 40.560 2.0
42.595375 142.003159 29.353 2018 9 10 0 40 54.970 0.2
42.670704 142.014984 28.392 2018 9 10 0 44 4.770 0.3
42.613880 141.996445 26.889 2018 9 10 0 46 35.620 1.9
42.671501 142.003525 27.279 2018 9 10 0 49 2.290 2.7
42.684746 141.940582 15.296 2018 9 10 0 50 43.360 0.8
42.730679 142.020279 26.704 2018 9 10 0 57 19.850 0.3
42.784039 141.941803 17.008 2018 9 10 1 2 59.900 1.5
42.603626 141.989731 26.446 2018 9 10 1 5 33.580 0.7
42.591854 142.015732 27.726 2018 9 10 1 9 10.720 0.6
42.620789 142.037949 31.268 2018 9 10 1 16 55.060 0.2
42.614967 142.024490 28.197 2018 9 10 1 17 23.730 0.7
42.622551 142.014053 16.467 2018 9 10 1 25 45.670 0.9
42.591579 142.057877 30.672 2018 9 10 1 32 24.540 0.8
42.671146 141.936371 14.976 2018 9 10 1 46 51.770 0.3
42.565151 141.995544 37.753 2018 9 10 1 48 33.980 0.5
42.642269 142.017471 27.841 2018 9 10 1 49 22.170 0.7
42.621151 141.992462 24.407 2018 9 10 1 51 17.900 0.7
42.766598 141.996307 30.693 2018 9 10 1 57 55.190 2.2
42.775406 142.006836 29.135 2018 9 10 2 2 6.030 1.0
42.584648 141.999222 29.688 2018 9 10 2 8 46.430 2.9
42.707756 141.942978 12.452 2018 9 10 2 14 20.380 0.9
42.590519 142.000885 32.242 2018 9 10 2 19 30.910 0.8
42.668159 142.019745 28.785 2018 9 10 2 19 55.720 3.2
42.603458 141.994522 28.175 2018 9 10 2 24 42.060 1.0
42.801208 142.022522 28.766 2018 9 10 2 27 23.720 1.8
42.666817 141.931458 14.605 2018 9 10 2 29 41.880 0.7
42.696732 142.006165 26.414 2018 9 10 2 30 3.060 1.0
42.662746 142.016785 28.100 2018 9 10 2 35 49.860 0.6
42.644188 142.024643 29.716 2018 9 10 2 38 33.600 1.9
42.716854 142.002335 25.568 2018 9 10 2 45 1.690 0.4
42.660072 142.023300 29.352 2018 9 10 2 45 30.030 1.2
42.683487 141.939102 20.372 2018 9 10 2 47 26.230 0.7
42.603058 141.998291 29.597 2018 9 10 2 51 14.540 0.9
42.600693 141.981934 26.191 2018 9 10 2 52 15.070 0.7
42.678902 142.005859 29.452 2018 9 10 2 55 9.340 0.4
42.706558 142.005295 29.645 2018 9 10 2 55 26.100 3.2
42.661278 142.001419 25.060 2018 9 10 2 57 20.840 1.2
42.666912 142.013474 25.690 2018 9 10 2 58 20.540 0.1
42.599403 141.991882 30.926 2018 9 10 3 1 27.910 0.7
42.625328 142.027802 30.127 2018 9 10 3 2 21.940 1.2
42.662819 142.016571 30.615 2018 9 10 3 2 38.040 0.7
42.683678 141.920364 14.048 2018 9 10 3 4 4.060 0.5
42.602303 142.024841 29.271 2018 9 10 3 10 19.740 1.0
42.589035 141.970276 26.481 2018 9 10 3 17 5.020 0.3
42.716331 141.978699 30.264 2018 9 10 3 18 11.350 0.0
42.635849 141.909042 12.626 2018 9 10 3 23 21.070 1.5
42.661613 142.017044 32.515 2018 9 10 3 28 5.660 0.3
42.683067 141.928268 21.508 2018 9 10 3 39 38.980 0.0
42.659740 141.911331 16.959 2018 9 10 3 40 32.330 0.8
42.652157 142.021439 27.895 2018 9 10 3 42 10.400 0.5
42.671944 142.011398 29.235 2018 9 10 3 48 10.870 3.5
42.602043 141.873276 25.695 2018 9 10 3 50 47.890 1.1
42.652325 142.033722 32.133 2018 9 10 3 52 9.850 0.2
42.590202 141.910019 18.796 2018 9 10 3 53 39.700 1.2
42.768501 142.016388 30.584 2018 9 10 3 56 0.720 0.5
42.593594 141.926666 18.502 2018 9 10 3 57 18.360 0.9
42.738342 142.004227 26.867 2018 9 10 4 0 45.300 0.7
42.684887 142.011505 27.513 2018 9 10 4 4 11.570 0.5
42.657265 142.013306 28.254 2018 9 10 4 10 39.870 3.1
42.611408 141.985474 26.036 2018 9 10 4 12 58.390 1.0
42.667004 141.970093 33.082 2018 9 10 4 15 50.850 0.0
42.716213 141.882614 11.643 2018 9 10 4 18 36.150 0.7
42.665745 141.927368 11.829 2018 9 10 4 34 3.920 0.5
42.636505 142.009689 26.266 2018 9 10 4 47 52.790 1.1
42.650837 142.008408 30.978 2018 9 10 4 50 14.440 1.2
42.537712 141.910492 12.906 2018 9 10 4 57 51.120 0.6
42.677471 142.014389 29.617 2018 9 10 4 58 27.750 2.1
42.670052 141.910080 15.436 2018 9 10 4 58 45.900 1.5
42.699413 142.033981 28.718 2018 9 10 5 2 45.080 0.5
42.661484 142.136688 10.167 2018 9 10 5 8 5.960 1.5
42.664677 142.013916 27.488 2018 9 10 5 19 54.400 1.8
42.648430 142.018433 27.979 2018 9 10 5 24 18.480 1.4
42.669815 142.009766 28.559 2018 9 10 5 32 4.980 2.1
42.664650 142.029861 29.450 2018 9 10 5 36 1.610 0.2
42.684853 141.958511 28.218 2018 9 10 5 39 39.880 0.5
42.587429 141.999435 25.308 2018 9 10 5 41 58.280 0.6
42.761749 141.996155 29.799 2018 9 10 5 47 52.070 1.4
42.586773 141.991745 26.506 2018 9 10 5 51 14.220 3.8
42.658600 142.014999 27.468 2018 9 10 6 1 6.120 0.2
42.660252 142.009277 27.597 2018 9 10 6 5 55.850 2.7
42.711357 142.148590 32.380 2018 9 10 6 27 53.710 1.1
42.661316 142.131149 7.959 2018 9 10 6 28 30.890 1.3
42.806225 142.026688 31.339 2018 9 10 6 30 3.160 1.0
42.685345 142.030579 28.550 2018 9 10 6 30 22.080 0.6
42.621799 142.005051 27.642 2018 9 10 6 36 54.860 0.9
42.642445 142.139877 9.926 2018 9 10 6 52 20.380 1.1
42.733776 141.985703 33.525 2018 9 10 6 57 22.590 1.3
42.696831 142.001129 28.910 2018 9 10 6 58 18.610 1.0
42.658485 142.020355 29.574 2018 9 10 7 1 48.210 1.2
42.590908 141.973984 25.863 2018 9 10 7 2 50.610 1.2
42.671669 141.973724 25.364 2018 9 10 7 9 46.690 0.7
42.674465 142.043610 30.387 2018 9 10 7 10 23.300 0.1
42.543922 141.875198 27.058 2018 9 10 7 32 8.320 1.5
42.709332 141.974396 30.071 2018 9 10 7 39 49.870 0.1
42.599300 141.945648 17.003 2018 9 10 7 40 8.430 1.5
42.599457 142.004852 27.813 2018 9 10 7 53 51.930 1.4
42.586136 142.016159 28.127 2018 9 10 7 57 33.840 0.9
42.609852 142.020905 33.043 2018 9 10 7 59 24.130 0.1
42.625893 142.027359 32.108 2018 9 10 8 0 41.010 1.4
42.760162 141.903000 14.101 2018 9 10 8 7 32.590 1.4
42.764297 141.891159 11.797 2018 9 10 8 9 23.740 0.8
42.697067 142.004639 27.131 2018 9 10 8 13 34.910 1.1
42.768753 142.013779 28.370 2018 9 10 8 35 34.020 0.6
42.678997 142.009262 25.902 2018 9 10 8 36 24.530 1.0
42.674492 142.015793 27.516 2018 9 10 8 37 5.870 0.2
42.650166 142.023712 30.891 2018 9 10 8 38 27.390 1.4
42.611408 142.011414 32.898 2018 9 10 8 58 29.060 0.5
42.708847 142.013351 28.238 2018 9 10 9 18 47.980 2.2
42.646053 141.943970 13.703 2018 9 10 9 59 41.140 0.6
42.712742 142.006470 25.160 2018 9 10 10 4 56.510 0.5
42.606979 142.017212 32.193 2018 9 10 10 11 46.800 2.3
42.602802 141.993103 30.202 2018 9 10 10 13 22.020 1.0
42.604031 142.017258 30.859 2018 9 10 10 39 33.800 1.7
42.695713 142.004410 25.935 2018 9 10 10 43 2.680 1.3
42.804279 142.017532 29.002 2018 9 10 10 45 12.750 1.9
42.661587 142.000031 25.691 2018 9 10 10 45 46.510 1.5
42.698288 142.006302 29.283 2018 9 10 11 11 34.440 2.4
42.641464 142.027344 30.312 2018 9 10 11 16 6.820 1.7
42.586544 141.973434 25.531 2018 9 10 11 25 58.300 1.9
42.660290 142.008682 27.609 2018 9 10 11 44 19.590 0.9
42.676247 142.019577 29.804 2018 9 10 11 53 21.800 2.2
42.722996 141.997925 26.797 2018 9 10 11 54 49.900 2.1
42.547604 141.998795 22.227 2018 9 10 11 57 56.070 0.6
42.632339 142.024918 31.048 2018 9 10 12 15 2.700 1.2
42.742432 142.029755 27.055 2018 9 10 12 20 1.880 0.9
42.672726 141.939011 15.305 2018 9 10 12 21 6.550 1.2
42.679420 141.963226 23.023 2018 9 10 12 24 46.380 0.9
42.696426 142.002335 28.447 2018 9 10 12 25 21.990 3.7
42.595127 141.964630 25.749 2018 9 10 12 27 1.130 2.1
42.685070 141.995590 32.569 2018 9 10 12 32 1.770 0.5
42.720703 141.960602 28.877 2018 9 10 12 33 6.910 1.1
42.688187 141.996445 27.538 2018 9 10 12 41 15.200 1.2
42.761223 141.900345 14.521 2018 9 10 12 44 50.930 1.3
42.607735 141.996902 25.250 2018 9 10 12 51 1.140 0.9
42.627216 141.992599 24.641 2018 9 10 12 55 12.180 1.3
42.680927 141.940765 14.467 2018 9 10 12 55 47.390 1.0
42.581726 141.999573 23.431 2018 9 10 13 25 6.180 1.2
42.644314 142.027512 29.553 2018 9 10 13 41 39.350 1.4
42.640255 142.020905 29.173 2018 9 10 13 46 56.630 2.0
42.616638 141.978500 23.692 2018 9 10 13 49 24.000 1.0
42.645351 142.028595 28.385 2018 9 10 13 50 1.940 1.3
42.756474 142.024124 28.007 2018 9 10 13 50 26.750 1.5
42.713303 142.008240 25.499 2018 9 10 13 51 27.760 1.2
42.781120 141.987839 26.749 2018 9 10 14 7 39.660 1.2
42.709282 142.006088 27.805 2018 9 10 14 12 34.100 1.4
42.584351 142.014267 33.561 2018 9 10 14 36 40.130 1.0
42.606506 142.000305 29.650 2018 9 10 14 43 42.920 1.2
42.598576 142.020325 29.816 2018 9 10 14 57 23.170 1.5
42.681961 142.020416 27.212 2018 9 10 14 57 47.490 1.2
42.677425 142.140961 11.675 2018 9 10 15 4 9.840 1.0
42.760460 141.906158 13.583 2018 9 10 15 7 43.420 1.0
42.722889 142.015213 29.052 2018 9 10 15 8 35.900 2.0
42.802334 142.021240 25.209 2018 9 10 15 22 55.370 1.0
42.625767 142.031479 32.036 2018 9 10 15 26 39.720 1.4
42.724201 141.995239 27.398 2018 9 10 15 37 9.760 3.4
42.625645 142.034943 33.504 2018 9 10 15 38 58.890 1.6
42.665192 142.013351 27.426 2018 9 10 15 46 56.060 0.9
42.609943 142.024384 31.102 2018 9 10 15 47 41.300 3.0
42.635559 142.015091 31.474 2018 9 10 16 4 7.860 1.1
42.601982 141.988129 24.112 2018 9 10 16 6 46.060 0.5
42.694859 142.000717 27.381 2018 9 10 16 17 25.070 0.6
42.634430 142.015076 32.086 2018 9 10 16 17 58.840 0.8
42.667919 142.015259 34.980 2018 9 10 16 21 20.490 4.1
42.697266 141.995071 33.212 2018 9 10 16 31 32.580 0.8
42.600334 142.005661 31.086 2018 9 10 16 39 25.820 2.3
42.802120 142.011505 31.344 2018 9 10 16 49 40.380 0.1
42.534756 141.954971 17.290 2018 9 10 16 54 45.270 1.5
42.628868 142.029984 32.338 2018 9 10 17 0 1.440 1.6
42.621902 141.995789 25.392 2018 9 10 17 9 45.920 1.0
42.679146 142.011230 26.523 2018 9 10 17 15 2.540 1.2
42.790398 141.928497 15.921 2018 9 10 17 17 19.160 0.8
42.665852 142.022598 28.525 2018 9 10 17 23 32.020 2.0
42.684494 142.009262 27.983 2018 9 10 17 30 46.360 0.7
42.695450 142.007309 26.167 2018 9 10 17 32 31.800 1.1
42.619720 142.013123 28.463 2018 9 10 17 36 22.640 0.6
42.661282 142.013367 25.849 2018 9 10 17 38 45.920 0.9
42.664455 142.013809 28.060 2018 9 10 17 40 28.000 0.9
42.596443 141.993027 27.888 2018 9 10 17 49 37.840 1.3
42.701817 141.966965 39.251 2018 9 10 18 7 52.640 0.9
42.659489 141.984772 23.646 2018 9 10 18 13 46.680 0.9
42.629040 142.039841 36.672 2018 9 10 18 19 29.680 0.9
42.671692 141.938293 19.012 2018 9 10 18 25 6.120 1.3
42.726326 142.029556 23.827 2018 9 10 18 31 3.200 0.7
42.522362 141.956543 18.812 2018 9 10 18 38 27.800 2.1
42.524109 141.935349 17.285 2018 9 10 18 39 41.620 1.1
42.504116 141.967026 19.180 2018 9 10 18 47 49.480 1.1
42.680157 141.997131 32.296 2018 9 10 18 56 40.040 0.5
42.630962 141.996567 25.039 2018 9 10 18 58 51.240 1.8
42.612545 142.009796 32.564 2018 9 10 19 0 33.500 2.7
42.682442 142.006271 27.985 2018 9 10 19 3 15.680 0.7
42.720600 141.986298 24.093 2018 9 10 19 4 51.200 0.8
42.699459 142.006683 26.849 2018 9 10 19 17 40.320 0.9
42.667988 141.961273 19.584 2018 9 10 19 32 17.080 1.3
42.665150 141.962341 19.114 2018 9 10 19 35 25.680 1.0
42.673325 141.944519 21.687 2018 9 10 19 35 49.720 1.0
42.627995 141.990829 25.234 2018 9 10 19 42 53.640 1.1
42.724136 142.003479 25.045 2018 9 10 19 44 7.440 0.8
42.684624 141.999207 27.998 2018 9 10 19 48 47.200 1.1
42.671520 142.007690 27.659 2018 9 10 19 54 11.740 1.3
42.691032 141.997910 30.451 2018 9 10 19 58 35.180 0.7
42.683273 141.999756 30.578 2018 9 10 20 14 35.800 0.7
42.512089 141.973495 22.007 2018 9 10 20 24 45.480 1.1
42.769688 142.024750 27.525 2018 9 10 20 33 33.860 0.9
42.632927 142.007248 25.817 2018 9 10 20 59 31.840 0.9
42.641361 141.916412 12.149 2018 9 10 21 3 15.360 0.9
42.575768 141.987045 24.232 2018 9 10 21 6 17.220 0.8
42.720474 142.001694 28.196 2018 9 10 21 8 21.720 0.6
42.692970 141.996964 27.028 2018 9 10 21 18 42.120 0.8
42.611256 141.975708 26.306 2018 9 10 21 18 53.760 1.2
42.814800 142.016449 26.297 2018 9 10 21 19 30.600 1.2
42.671551 142.003220 25.836 2018 9 10 21 21 48.360 1.3
42.725159 141.905914 14.039 2018 9 10 21 25 45.560 1.2
42.771111 141.900635 14.751 2018 9 10 21 26 33.200 1.2
42.786442 141.921143 14.704 2018 9 10 21 32 10.720 0.4
42.669407 142.006973 26.776 2018 9 10 21 50 13.840 1.3
42.700531 142.027222 28.150 2018 9 10 21 50 46.320 1.0
42.731377 141.999847 24.524 2018 9 10 22 0 38.400 0.6
42.568596 142.027206 29.792 2018 9 10 22 3 24.500 1.2
42.739727 142.008026 28.489 2018 9 10 22 11 41.500 1.2
42.787743 141.937134 15.314 2018 9 10 22 18 39.200 0.7
42.693428 142.001816 27.788 2018 9 10 22 19 36.300 0.6
42.652290 141.999603 25.250 2018 9 10 22 23 27.840 1.2
42.652233 141.925598 14.824 2018 9 10 22 24 52.760 0.8
42.801044 142.028717 27.212 2018 9 10 22 40 5.400 1.3
42.618382 142.010834 32.004 2018 9 10 22 41 23.920 1.1
42.773808 142.008301 28.577 2018 9 10 22 42 34.760 1.0
42.630836 142.025131 32.957 2018 9 10 22 45 15.380 1.4
42.645786 142.033295 33.596 2018 9 10 22 56 42.680 0.9
42.677162 141.969223 26.932 2018 9 10 23 3 57.520 0.4
42.670361 142.010086 28.874 2018 9 10 23 12 4.420 1.1
42.621506 141.919144 15.957 2018 9 10 23 20 57.280 0.9
42.611954 142.016418 32.802 2018 9 10 23 23 2.260 3.1
42.607903 142.015869 31.684 2018 9 10 23 23 38.680 3.2
42.709126 141.975723 32.312 2018 9 10 23 35 32.500 0.6
42.646950 141.928375 16.148 2018 9 10 23 37 4.280 1.8
42.649998 141.926727 14.508 2018 9 10 23 39 22.180 0.0
42.647488 141.927765 16.202 2018 9 10 23 40 16.400 1.9
42.622650 142.014389 27.518 2018 9 10 23 50 59.840 0.3
42.751011 141.941193 14.406 2018 9 10 23 51 19.720 0.7
42.614204 141.990067 26.997 2018 9 11 0 3 32.500 1.3
42.628021 142.022232 25.234 2018 9 11 0 7 1.100 0.7
42.590191 142.004517 29.868 2018 9 11 0 10 59.820 0.6
42.669159 141.960632 19.724 2018 9 11 0 11 24.090 1.3
42.717747 142.009689 27.631 2018 9 11 0 16 43.090 1.2
42.774754 141.983810 27.804 2018 9 11 0 34 39.090 1.5
42.725571 141.910095 14.033 2018 9 11 0 42 38.070 1.4
42.727184 141.910980 12.269 2018 9 11 0 43 37.660 1.1
42.800739 142.025482 28.155 2018 9 11 0 56 28.920 1.7
42.652576 142.018021 27.781 2018 9 11 0 58 43.240 1.7
42.642174 141.950897 19.504 2018 9 11 1 0 43.280 1.0
42.593044 141.923660 14.198 2018 9 11 1 11 19.100 1.3
42.655315 141.930466 14.073 2018 9 11 1 12 20.290 0.4
42.625423 141.997803 25.472 2018 9 11 1 13 44.420 0.9
42.649059 141.926727 15.159 2018 9 11 1 17 19.040 1.2
42.645111 141.906464 14.797 2018 9 11 1 17 37.450 1.3
42.716541 142.014847 27.789 2018 9 11 1 43 36.170 1.1
42.701374 141.925446 16.063 2018 9 11 1 44 16.620 1.1
42.633198 142.005707 25.483 2018 9 11 1 51 5.540 1.0
42.632481 142.124054 13.425 2018 9 11 1 54 13.690 0.8
42.705620 141.909210 18.702 2018 9 11 1 59 36.110 0.9
42.813473 142.012619 28.379 2018 9 11 2 2 16.060 1.6
42.698750 142.008667 25.047 2018 9 11 2 6 44.100 0.9
42.634590 142.025162 31.295 2018 9 11 2 10 32.500 2.5
42.578312 141.991516 27.564 2018 9 11 2 19 6.370 0.9
42.749130 142.023178 28.021 2018 9 11 2 26 38.360 0.8
42.704109 141.902924 15.100 2018 9 11 2 39 40.070 0.6
42.694740 141.924240 18.094 2018 9 11 2 40 50.930 1.5
42.698914 141.994354 27.855 2018 9 11 2 49 16.330 1.1
42.689983 142.005936 26.852 2018 9 11 2 52 3.040 0.6
42.759960 141.994354 30.036 2018 9 11 2 53 49.690 0.9
42.737179 141.890366 12.882 2018 9 11 3 3 5.430 1.3
42.635910 141.813797 7.503 2018 9 11 3 5 1.220 1.3
42.511227 141.967590 17.506 2018 9 11 3 7 28.150 0.9
42.635136 142.021347 29.520 2018 9 11 3 12 2.700 1.0
42.593884 142.010681 29.128 2018 9 11 3 30 22.320 0.9
42.660133 142.026825 30.216 2018 9 11 3 35 43.990 0.9
42.561825 141.957321 16.824 2018 9 11 3 44 47.840 1.1
42.549095 141.844284 13.940 2018 9 11 4 0 34.660 0.9
42.658604 141.985580 21.382 2018 9 11 4 6 40.810 0.8
42.700443 142.011627 29.547 2018 9 11 4 9 33.810 1.2
42.590450 142.015762 30.852 2018 9 11 4 16 11.850 2.5
42.601700 141.983215 27.585 2018 9 11 4 19 0.450 1.1
42.607098 142.013474 31.883 2018 9 11 4 21 27.980 1.6
42.743614 142.016144 28.761 2018 9 11 4 40 16.180 0.5
42.764221 142.005920 36.696 2018 9 11 4 40 31.880 0.6
42.664463 142.019699 27.625 2018 9 11 4 53 31.990 1.2
42.632744 142.013687 28.404 2018 9 11 4 55 8.130 0.9
42.649319 141.877716 11.904 2018 9 11 4 57 9.820 1.4
42.699982 142.022232 27.771 2018 9 11 4 58 45.240 4.5
42.634487 142.009857 29.177 2018 9 11 5 2 7.930 0.0
42.564877 142.017441 28.972 2018 9 11 5 6 42.860 1.1
42.602692 142.041946 29.914 2018 9 11 5 15 40.500 0.8
42.685204 141.993286 28.287 2018 9 11 5 27 22.650 1.4
42.601620 142.018188 33.461 2018 9 11 5 47 25.190 0.8
42.577923 142.010635 27.032 2018 9 11 5 58 5.190 1.2
42.607655 142.002716 29.664 2018 9 11 6 15 12.640 1.6
42.721729 141.988770 26.023 2018 9 11 6 19 55.510 1.2
42.698364 142.017517 31.246 2018 9 11 6 34 55.800 1.0
42.600479 141.988022 29.800 2018 9 11 6 54 55.840 1.1
42.841713 141.987335 30.781 2018 9 11 6 58 25.410 1.3
42.574486 142.006058 26.689 2018 9 11 7 11 49.860 0.9
42.601494 142.140808 18.931 2018 9 11 7 28 55.690 1.2
42.644733 142.028122 31.328 2018 9 11 7 44 42.400 1.1
42.622643 141.932587 17.545 2018 9 11 7 48 43.030 1.1
42.731747 141.996613 29.299 2018 9 11 7 57 1.820 2.3
42.612141 142.004684 29.233 2018 9 11 8 5 48.530 1.3
42.648754 142.033722 33.091 2018 9 11 8 14 35.890 1.5
42.521194 141.954163 17.469 2018 9 11 8 17 2.870 1.7
42.663437 142.002640 32.271 2018 9 11 8 20 27.890 0.9
42.591801 141.973999 23.072 2018 9 11 8 21 58.070 1.3
42.590672 141.932556 37.344 2018 9 11 8 26 51.990 1.2
42.727970 141.895096 13.481 2018 9 11 8 34 54.740 0.8
42.555359 141.996429 25.413 2018 9 11 8 43 19.050 1.3
42.635250 142.014420 31.810 2018 9 11 9 2 25.430 1.0
42.725628 142.017181 28.889 2018 9 11 9 2 40.370 1.8
42.630760 142.028778 32.962 2018 9 11 9 3 59.130 1.6
42.615822 141.999313 27.349 2018 9 11 9 18 31.010 0.5
42.685207 142.015717 29.487 2018 9 11 9 33 50.490 0.5
42.592102 141.785080 28.246 2018 9 11 9 48 59.100 1.2
42.603760 141.998337 27.341 2018 9 11 10 3 3.240 1.2
42.604404 142.012741 29.762 2018 9 11 10 17 30.730 1.3
42.607109 142.010269 31.146 2018 9 11 10 26 6.270 1.5
42.799213 142.013916 28.258 2018 9 11 10 29 51.690 1.8
42.609039 142.001602 27.865 2018 9 11 10 44 41.850 1.3
42.719643 141.908813 14.404 2018 9 11 11 5 21.950 1.7
42.729351 141.903870 12.553 2018 9 11 11 5 38.050 1.6
42.719437 141.916687 13.723 2018 9 11 11 6 37.800 1.1
42.722279 142.008163 27.639 2018 9 11 11 11 35.120 1.1
42.683384 141.998245 30.613 2018 9 11 11 14 32.630 2.8
42.547096 141.953278 17.394 2018 9 11 11 44 56.060 0.8
42.607258 142.001770 26.720 2018 9 11 11 45 49.080 1.2
42.685436 142.023926 28.534 2018 9 11 12 0 23.210 1.1
42.724945 141.914307 13.463 2018 9 11 12 21 41.700 1.0
42.724792 142.004242 28.863 2018 9 11 12 26 32.270 3.4
42.671505 141.978729 21.561 2018 9 11 12 30 41.590 1.5
42.683487 142.001633 31.577 2018 9 11 12 31 12.660 1.8
42.711487 142.000473 26.478 2018 9 11 12 41 12.550 0.3
42.733486 142.004578 25.537 2018 9 11 12 49 31.510 1.7
42.724850 141.912460 14.724 2018 9 11 12 54 49.090 4.3
42.717335 141.909821 15.890 2018 9 11 12 55 50.620 3.4
42.693245 141.999359 27.443 2018 9 11 12 58 30.870 3.0
42.594925 142.015137 33.335 2018 9 11 13 0 46.320 1.3
42.616131 141.998245 26.607 2018 9 11 13 9 35.030 1.5
42.692154 141.937073 17.489 2018 9 11 13 10 57.150 1.1
42.691666 142.002731 26.975 2018 9 11 13 11 25.960 1.3
42.599751 142.004669 30.249 2018 9 11 13 12 31.230 1.3
42.716625 141.911148 13.815 2018 9 11 13 22 49.040 1.0
42.652351 142.023987 30.344 2018 9 11 13 24 1.190 0.5
42.726940 141.920807 12.579 2018 9 11 13 46 14.700 1.3
42.721241 141.918579 13.045 2018 9 11 13 46 47.440 1.4
42.720028 142.005280 26.768 2018 9 11 14 11 1.120 1.0
42.597519 141.990753 26.101 2018 9 11 14 20 20.170 1.3
42.596939 141.972733 24.718 2018 9 11 14 33 32.460 1.6
42.599827 142.010071 29.020 2018 9 11 14 34 12.620 1.0
42.585239 141.971359 24.638 2018 9 11 14 35 11.970 1.5
42.798805 142.010391 26.013 2018 9 11 14 37 28.220 0.9
42.637455 141.913010 15.404 2018 9 11 14 38 47.180 1.4
42.586727 141.972183 27.352 2018 9 11 14 44 44.210 2.0
42.638069 142.043640 29.778 2018 9 11 14 53 45.770 1.5
42.567127 141.989075 21.918 2018 9 11 15 30 17.020 1.8
42.764008 141.902832 13.423 2018 9 11 15 43 11.400 1.4
42.704411 142.001846 26.881 2018 9 11 15 45 18.050 1.3
42.681599 141.953659 15.167 2018 9 11 15 54 7.350 0.9
42.651237 141.897842 12.537 2018 9 11 16 11 56.710 0.5
42.605385 142.012787 29.669 2018 9 11 16 15 54.820 1.2
42.734051 141.918549 15.076 2018 9 11 16 55 44.910 1.8
42.635571 142.032349 30.347 2018 9 11 16 59 4.740 1.4
42.614986 141.993820 24.325 2018 9 11 17 2 15.000 1.2
42.600742 141.981918 22.271 2018 9 11 17 11 22.540 1.2
42.644608 141.850937 10.022 2018 9 11 17 17 56.480 1.2
42.699032 142.003098 26.284 2018 9 11 17 19 40.880 1.2
42.668198 141.985168 23.895 2018 9 11 17 29 46.000 2.2
42.653240 142.016373 35.015 2018 9 11 17 39 32.420 1.3
42.659863 142.021347 25.614 2018 9 11 17 55 27.080 0.4
42.641102 142.026596 32.654 2018 9 11 17 56 13.720 0.8
42.676945 142.005280 25.505 2018 9 11 18 5 58.140 1.3
42.606750 142.039261 34.873 2018 9 11 18 11 20.440 3.0
42.628166 141.934525 13.171 2018 9 11 18 12 22.840 1.9
42.589550 142.012527 28.736 2018 9 11 18 15 52.340 2.3
42.779079 142.002304 25.745 2018 9 11 18 43 3.200 0.7
42.685394 142.011490 24.750 2018 9 11 18 50 23.840 0.9
42.578136 142.025604 28.788 2018 9 11 18 53 19.180 0.8
42.805389 142.010910 26.520 2018 9 11 18 53 38.480 1.2
42.584072 141.995575 21.466 2018 9 11 18 58 24.880 0.9
42.719090 141.911148 15.082 2018 9 11 19 7 22.740 1.3
42.804993 142.015610 29.060 2018 9 11 19 7 32.640 4.2
42.735134 142.003876 26.737 2018 9 11 19 10 26.520 1.4
42.678043 141.998764 26.793 2018 9 11 19 21 11.560 0.9
42.575489 142.006271 18.961 2018 9 11 19 33 32.020 1.0
42.557087 141.999344 27.429 2018 9 11 19 35 49.240 2.1
42.644234 142.023697 34.189 2018 9 11 19 40 27.960 0.2
42.652119 142.027740 26.664 2018 9 11 19 41 27.600 1.5
42.658676 141.860413 23.907 2018 9 11 19 43 5.200 1.4
42.653557 142.016449 26.955 2018 9 11 19 46 22.040 1.1
42.659969 142.015915 27.703 2018 9 11 19 54 16.800 1.2
42.660534 142.025574 27.263 2018 9 11 20 9 2.920 1.2
42.630527 142.042160 27.038 2018 9 11 20 12 40.920 0.3
42.715340 141.910736 13.796 2018 9 11 20 14 54.860 0.8
42.663101 141.918320 15.576 2018 9 11 20 19 47.200 0.7
42.675255 142.048889 33.989 2018 9 11 20 37 10.320 0.7
42.741470 142.019348 28.646 2018 9 11 20 39 48.040 1.2
42.683937 141.921829 13.574 2018 9 11 20 40 29.260 1.1
42.725498 141.895645 16.026 2018 9 11 20 40 42.520 1.6
42.723114 141.985764 29.998 2018 9 11 20 41 10.920 1.8
42.790749 141.930649 14.583 2018 9 11 20 49 16.080 0.3
42.601608 142.017349 31.165 2018 9 11 20 51 31.480 3.6
42.660679 142.017639 29.687 2018 9 11 21 18 0.440 1.0
42.593815 142.106506 16.442 2018 9 11 21 36 11.580 0.2
42.687412 142.005325 26.404 2018 9 11 21 36 59.400 0.6
42.501751 141.914261 13.501 2018 9 11 21 53 0.660 1.0
42.602764 141.984863 25.607 2018 9 11 21 57 9.600 1.1
42.525032 141.920731 16.440 2018 9 11 22 13 46.780 1.1
42.648808 142.014603 30.476 2018 9 11 22 17 38.480 1.3
42.679024 141.989380 33.765 2018 9 11 22 18 22.720 0.2
42.706081 142.003891 27.232 2018 9 11 22 18 40.400 1.5
42.600353 142.008636 31.618 2018 9 11 22 25 21.920 0.0
42.588505 141.981781 33.086 2018 9 11 22 34 52.120 0.3
42.727455 141.904846 13.912 2018 9 11 22 42 32.040 0.6
42.641079 142.039230 33.608 2018 9 11 22 43 31.180 0.1
42.699749 142.004318 29.954 2018 9 11 22 45 0.820 1.0
42.611805 141.995560 28.401 2018 9 11 22 57 16.040 3.5
42.595932 141.999100 29.802 2018 9 11 23 46 16.040 1.0
42.771729 141.938965 18.741 2018 9 11 23 48 11.280 0.5
42.801025 142.016312 27.723 2018 9 11 23 52 42.400 1.3
42.645000 142.015884 30.355 2018 9 12 0 11 2.820 0.4
42.633671 141.997299 28.086 2018 9 12 0 19 53.050 1.0
42.673962 141.996170 26.319 2018 9 12 0 37 37.610 1.2
42.604633 141.975632 25.560 2018 9 12 0 40 47.560 0.0
42.657528 142.023422 28.952 2018 9 12 0 41 43.560 1.1
42.646076 142.014526 28.692 2018 9 12 0 42 27.100 0.8
42.806305 141.995728 27.331 2018 9 12 0 43 10.550 0.7
42.556389 142.011261 19.890 2018 9 12 1 11 16.150 0.8
42.815239 142.003067 19.087 2018 9 12 1 37 13.430 0.5
42.713234 141.954559 24.853 2018 9 12 1 38 9.770 0.0
42.689758 141.872467 23.141 2018 9 12 1 39 0.510 0.4
42.736362 142.014572 29.291 2018 9 12 1 55 30.930 1.5
42.791492 142.111786 19.940 2018 9 12 2 2 2.580 0.3
42.680790 142.012772 31.098 2018 9 12 2 2 4.550 2.1
42.573750 141.978104 26.625 2018 9 12 2 3 40.060 0.5
42.608391 141.978683 32.487 2018 9 12 2 4 2.390 0.5
42.663307 141.993271 23.236 2018 9 12 2 8 19.140 0.6
42.637333 141.984573 25.548 2018 9 12 2 14 38.990 0.2
42.588493 142.014938 37.220 2018 9 12 2 14 56.200 0.7
42.572796 141.994583 27.427 2018 9 12 2 20 59.840 0.7
42.694824 141.997620 25.413 2018 9 12 2 26 55.210 1.1
42.722401 142.003738 27.167 2018 9 12 2 28 43.810 1.4
42.678169 142.004837 27.025 2018 9 12 2 43 7.140 0.3
42.659836 142.021729 33.104 2018 9 12 2 46 4.320 1.1
42.649853 142.019226 38.803 2018 9 12 2 51 3.370 0.1
42.640499 142.025406 31.004 2018 9 12 2 54 31.070 1.0
42.705036 142.004440 27.531 2018 9 12 3 5 2.110 1.1
42.612053 141.984283 22.123 2018 9 12 3 5 29.230 0.7
42.582016 142.025070 29.283 2018 9 12 3 15 16.160 0.7
42.658028 141.927505 17.288 2018 9 12 3 43 47.250 1.8
42.715084 142.011856 26.711 2018 9 12 3 52 12.180 0.9
42.720516 141.909790 12.467 2018 9 12 3 59 9.210 0.8
42.587734 141.990646 25.605 2018 9 12 4 20 7.840 1.3
42.662308 142.010803 39.490 2018 9 12 4 21 59.620 0.0
42.717197 141.891418 13.051 2018 9 12 4 24 21.790 0.8
42.755291 142.019119 30.984 2018 9 12 4 39 21.660 3.4
42.552402 142.001617 29.074 2018 9 12 4 53 48.080 0.7
42.688965 141.952103 31.119 2018 9 12 4 56 29.580 0.7
42.661026 142.005676 30.520 2018 9 12 5 11 17.420 1.1
42.612598 141.983627 26.285 2018 9 12 5 14 56.960 0.9
42.647861 142.022797 30.755 2018 9 12 5 19 20.650 2.5
42.606380 142.016281 31.734 2018 9 12 5 47 18.300 2.5
42.820732 141.918610 13.356 2018 9 12 5 50 17.260 1.1
42.649967 141.960327 22.058 2018 9 12 5 54 11.770 1.4
42.622520 141.912903 16.204 2018 9 12 6 1 12.230 0.7
42.599377 141.988586 24.572 2018 9 12 6 6 54.390 1.4
42.747437 142.017624 28.545 2018 9 12 6 47 17.440 2.4
42.633556 142.022919 30.960 2018 9 12 6 50 33.950 2.7
42.623901 141.999344 30.255 2018 9 12 6 55 36.950 1.0
42.596569 142.012268 30.971 2018 9 12 7 18 30.200 1.5
42.607895 141.972778 32.540 2018 9 12 7 21 53.160 0.2
42.588058 142.011444 30.481 2018 9 12 7 45 27.220 0.5
42.708481 141.909851 15.487 2018 9 12 7 45 38.020 1.2
42.662762 142.034134 31.212 2018 9 12 7 59 30.260 1.4
42.736584 142.006668 27.149 2018 9 12 8 0 23.560 1.8
42.626671 141.998810 27.654 2018 9 12 8 1 39.110 1.6
42.719097 141.975967 34.007 2018 9 12 8 9 49.030 0.0
42.684906 142.002045 28.466 2018 9 12 8 9 56.830 2.6
42.657879 142.018982 26.651 2018 9 12 8 15 39.690 0.6
42.695305 142.004959 26.800 2018 9 12 8 53 28.980 1.3
42.584427 142.026489 28.168 2018 9 12 9 26 47.400 1.1
42.695415 142.007278 28.626 2018 9 12 9 34 34.790 1.2
42.675747 141.977310 31.622 2018 9 12 9 36 31.900 1.3
42.785587 142.026627 26.190 2018 9 12 9 47 33.040 1.4
42.624485 142.028076 32.565 2018 9 12 10 7 48.830 1.3
42.699783 142.017181 26.569 2018 9 12 10 40 55.540 1.3
42.807629 142.008301 28.069 2018 9 12 10 44 9.240 0.8
42.712845 142.002441 27.564 2018 9 12 10 55 46.660 2.1
42.663563 141.923157 15.237 2018 9 12 11 7 45.100 1.0
42.590752 141.975815 25.464 2018 9 12 11 12 30.700 1.6
42.698769 141.999329 28.238 2018 9 12 11 13 7.100 2.4
42.795998 142.008942 27.841 2018 9 12 11 20 56.090 0.7
42.678566 142.001297 28.708 2018 9 12 11 23 30.870 0.5
42.667435 142.010040 27.528 2018 9 12 11 30 30.570 1.3
42.642265 142.026505 29.764 2018 9 12 11 34 25.830 2.6
42.593483 142.001099 29.193 2018 9 12 11 45 10.210 0.6
42.722260 141.913132 13.441 2018 9 12 12 11 12.340 1.6
42.725571 141.914291 14.052 2018 9 12 12 13 34.410 2.0
42.686619 142.007614 25.160 2018 9 12 12 21 50.230 1.3
42.648888 142.035370 32.403 2018 9 12 12 45 14.050 1.3
42.661316 142.014755 29.612 2018 9 12 13 20 30.430 1.7
42.704487 142.025070 35.686 2018 9 12 13 23 27.030 1.2
42.730656 142.006577 27.395 2018 9 12 13 23 54.570 1.3
42.625900 142.028427 30.405 2018 9 12 13 24 35.610 1.6
42.674599 142.000626 30.723 2018 9 12 13 30 33.060 0.3
42.652599 142.003159 25.870 2018 9 12 13 31 39.590 2.2
42.607311 142.009583 31.803 2018 9 12 13 37 50.410 0.8
42.690247 142.010620 27.130 2018 9 12 14 7 5.660 1.2
42.794125 142.052170 27.188 2018 9 12 14 12 1.050 2.8
42.680710 141.988297 24.456 2018 9 12 14 13 19.030 1.4
42.665283 142.000397 24.495 2018 9 12 14 30 1.180 1.0
42.607735 142.010117 31.455 2018 9 12 14 37 52.770 2.4
42.697765 142.000397 27.978 2018 9 12 14 56 52.440 1.9
42.654720 142.014038 26.550 2018 9 12 15 8 20.210 1.4
42.788200 142.013718 26.530 2018 9 12 15 9 24.030 0.8
42.695641 141.988602 30.117 2018 9 12 15 16 39.070 0.9
42.608620 142.006348 30.523 2018 9 12 15 38 6.080 2.4
42.720367 141.917023 13.274 2018 9 12 15 59 36.700 1.6
42.586014 142.028748 28.219 2018 9 12 16 10 41.640 1.0
42.600044 141.990845 27.908 2018 9 12 16 18 53.590 1.4
42.585739 141.974823 28.067 2018 9 12 16 22 19.910 1.3
42.723557 142.011154 27.234 2018 9 12 16 47 7.760 1.0
42.700172 142.007324 25.107 2018 9 12 17 3 38.560 1.0
42.622726 142.009796 31.708 2018 9 12 17 6 12.360 1.3
42.601715 142.008835 31.472 2018 9 12 17 15 28.360 1.0
42.643585 142.022827 30.214 2018 9 12 17 20 24.040 1.4
42.691849 142.002213 26.923 2018 9 12 17 43 28.560 1.1
42.704548 141.997818 26.366 2018 9 12 17 48 32.000 1.1
42.641201 142.130005 11.397 2018 9 12 18 10 31.200 1.7
42.673447 141.997910 26.007 2018 9 12 18 24 0.440 1.4
42.668064 142.014053 28.903 2018 9 12 18 24 51.160 4.5
42.671383 142.007950 27.497 2018 9 12 18 31 42.640 1.8
42.599773 141.998840 29.165 2018 9 12 18 33 14.840 1.2
42.566387 141.964096 28.443 2018 9 12 18 34 10.880 1.1
42.695698 142.004150 28.757 2018 9 12 18 52 24.880 1.2
42.671383 142.007797 27.595 2018 9 12 18 56 8.680 0.9
42.627506 142.026886 30.228 2018 9 12 19 11 7.640 1.3
42.671814 142.008957 25.186 2018 9 12 19 13 57.760 0.9
42.706856 142.036453 26.897 2018 9 12 19 14 31.320 1.0
42.606567 142.018005 32.342 2018 9 12 19 19 10.040 0.6
42.671932 142.004898 24.564 2018 9 12 19 37 59.160 1.1
42.644901 142.020767 29.548 2018 9 12 19 39 0.960 0.8
42.681446 141.997177 26.149 2018 9 12 19 57 49.320 1.0
42.640099 141.934433 14.558 2018 9 12 20 16 6.560 1.4
42.675243 142.015793 26.571 2018 9 12 20 26 46.440 1.1
42.607025 141.987350 27.837 2018 9 12 20 28 39.160 3.1
42.613338 141.986008 25.761 2018 9 12 20 39 6.880 0.9
42.651413 141.910736 15.363 2018 9 12 20 41 30.860 0.8
42.596695 142.011581 28.377 2018 9 12 20 46 23.440 1.1
42.659317 141.969223 30.767 2018 9 12 20 48 14.500 1.1
42.607143 142.019791 31.768 2018 9 12 21 40 20.640 1.9
42.604877 141.990311 27.336 2018 9 12 21 57 40.480 0.4
42.615658 142.012970 30.905 2018 9 12 21 59 24.360 0.0
42.663719 141.980576 22.317 2018 9 12 22 1 10.960 0.0
42.682262 142.011230 33.634 2018 9 12 22 3 46.640 1.4
42.636395 142.026672 31.439 2018 9 12 22 33 34.320 1.1
42.660107 142.007111 33.225 2018 9 12 23 7 11.480 0.8
42.666943 142.009369 28.958 2018 9 12 23 10 29.480 1.4
42.669670 142.001785 24.764 2018 9 12 23 10 36.360 1.4
42.679398 141.953888 5.164 2018 9 12 23 45 18.960 0.7
42.680687 142.011612 28.906 2018 9 12 23 47 28.580 0.9
42.603947 141.994034 27.133 2018 9 12 23 50 23.880 1.6
42.722168 141.998215 26.858 2018 9 12 23 59 11.060 1.5
42.721523 142.038651 27.407 2018 9 13 0 8 19.450 0.5
42.604816 141.972916 25.136 2018 9 13 0 22 22.280 1.2
42.784817 142.020355 29.373 2018 9 13 0 23 28.000 1.5
42.798286 142.016632 27.090 2018 9 13 0 34 6.740 0.9
42.604496 141.982620 27.259 2018 9 13 0 46 6.900 2.2
42.604198 141.997086 27.338 2018 9 13 1 10 4.910 1.0
42.611565 141.995010 27.813 2018 9 13 1 33 59.470 4.2
42.566696 142.075974 28.585 2018 9 13 2 25 33.140 1.5
42.612400 142.026260 32.119 2018 9 13 2 43 28.080 1.1
42.695717 142.003555 22.047 2018 9 13 2 54 46.300 1.4
42.720440 142.015076 29.475 2018 9 13 3 17 46.580 2.1
42.624889 141.984695 23.293 2018 9 13 3 23 45.150 1.3
42.688503 141.983490 28.330 2018 9 13 3 24 43.600 1.4
42.758419 142.020798 28.070 2018 9 13 3 25 4.000 1.2
42.601688 141.985809 26.802 2018 9 13 3 29 50.340 1.3
42.692383 141.993530 26.084 2018 9 13 3 36 10.730 1.4
42.691502 141.979843 25.294 2018 9 13 3 51 24.650 1.2
42.793694 142.013046 29.765 2018 9 13 3 54 39.810 1.3
42.698376 141.953918 15.473 2018 9 13 4 2 46.600 1.1
42.698673 141.945374 18.010 2018 9 13 4 2 49.860 0.0
42.665085 142.015045 28.845 2018 9 13 4 17 18.340 1.5
42.654697 142.012451 29.414 2018 9 13 4 39 42.480 1.1
42.635151 142.021591 30.740 2018 9 13 4 56 4.350 2.2
42.712650 142.034332 27.768 2018 9 13 5 12 46.870 3.5
42.714020 142.030991 27.771 2018 9 13 5 13 23.680 2.9
42.691345 142.009048 27.346 2018 9 13 5 20 4.940 0.6
42.730316 141.996277 26.972 2018 9 13 5 53 50.030 2.1
42.661419 142.029633 27.381 2018 9 13 5 56 13.320 0.6
42.600971 141.974976 30.860 2018 9 13 6 7 42.100 1.3
42.615936 141.986938 24.649 2018 9 13 6 24 42.910 1.6
42.609627 141.988083 24.177 2018 9 13 6 30 2.930 1.1
42.616123 142.018570 30.102 2018 9 13 7 28 36.910 0.9
42.757969 142.013107 29.795 2018 9 13 7 41 32.900 1.6
42.681229 141.928284 22.945 2018 9 13 7 51 34.100 0.7
42.806858 142.005051 26.493 2018 9 13 7 55 8.980 0.5
42.683563 142.010147 33.092 2018 9 13 7 55 36.280 1.4
42.676346 141.994980 26.336 2018 9 13 8 7 52.790 0.9
42.639393 142.022583 31.246 2018 9 13 8 13 43.200 1.5
42.615639 141.996994 24.803 2018 9 13 8 20 54.610 1.6
42.637966 142.037064 32.025 2018 9 13 9 1 2.780 1.4
42.760555 141.912949 10.698 2018 9 13 9 34 3.250 1.2
42.622295 141.948425 28.027 2018 9 13 9 41 34.350 1.5
42.586918 141.997940 29.084 2018 9 13 9 47 6.810 1.3
42.604603 141.993408 27.728 2018 9 13 9 56 5.080 1.3
42.643505 141.955688 10.483 2018 9 13 10 21 17.650 1.0
42.799973 142.023300 25.690 2018 9 13 10 36 10.190 0.7
42.720226 142.004562 24.310 2018 9 13 10 44 6.990 0.8
42.585247 141.998642 24.379 2018 9 13 10 55 18.140 1.5
42.797081 142.000931 29.013 2018 9 13 10 58 58.740 1.6
42.704514 142.016098 29.282 2018 9 13 11 9 34.830 1.3
42.593040 141.942657 31.036 2018 9 13 11 51 48.460 1.1
42.594353 142.121307 11.531 2018 9 13 12 19 23.350 1.4
42.652016 142.029495 33.685 2018 9 13 12 25 12.180 1.5
42.663151 141.999863 25.017 2018 9 13 13 0 3.480 0.6
42.689133 142.008240 27.338 2018 9 13 13 4 23.330 0.8
42.766781 142.008545 28.931 2018 9 13 13 8 38.760 1.4
42.660595 141.964859 10.179 2018 9 13 13 45 4.720 1.5
42.587166 142.000977 27.395 2018 9 13 13 49 24.640 1.6
42.701550 142.011215 27.546 2018 9 13 13 53 51.160 1.4
42.682682 142.017899 26.953 2018 9 13 14 19 43.130 1.3
42.672672 142.013565 30.079 2018 9 13 14 23 12.410 2.4
42.705772 142.000839 26.888 2018 9 13 14 46 24.720 1.5
42.596302 141.985947 28.896 2018 9 13 14 52 13.570 1.6
42.742958 141.937088 9.319 2018 9 13 14 57 39.090 1.5
42.689667 142.014099 29.715 2018 9 13 15 6 28.870 3.9
42.687675 142.005600 27.897 2018 9 13 15 15 18.560 1.5
42.762970 142.039337 31.330 2018 9 13 15 18 27.090 1.5
42.755466 142.035294 26.259 2018 9 13 15 19 57.920 1.5
42.440636 141.980057 12.958 2018 9 13 15 37 14.240 3.2
42.620159 141.898148 12.185 2018 9 13 16 16 13.210 1.4
42.633026 142.016098 27.214 2018 9 13 17 35 56.560 1.1
42.794048 142.013748 29.356 2018 9 13 18 37 23.800 1.0
42.632473 142.012833 28.253 2018 9 13 18 49 38.980 1.2
42.789238 142.008545 30.941 2018 9 13 19 23 37.700 0.8
42.651394 142.163574 10.940 2018 9 13 19 36 46.840 0.8
42.611595 142.004425 28.363 2018 9 13 19 50 11.180 0.4
42.596611 141.899551 18.712 2018 9 13 20 2 15.440 0.6
42.720779 141.907654 15.002 2018 9 13 20 9 46.000 1.0
42.716816 142.012558 28.306 2018 9 13 20 19 23.480 1.3
42.813694 142.078888 11.989 2018 9 13 20 21 25.760 1.0
42.832596 142.066574 11.752 2018 9 13 20 22 8.000 0.2
42.628151 141.987747 25.383 2018 9 13 20 22 17.120 1.5
42.717190 141.998352 25.058 2018 9 13 20 57 20.420 0.9
42.812485 142.088547 11.031 2018 9 13 21 17 45.300 1.4
42.598488 142.052460 12.754 2018 9 13 21 27 29.360 0.0
42.516922 141.981049 17.921 2018 9 13 21 27 49.360 1.0
42.814167 142.081940 12.211 2018 9 13 21 32 25.000 0.1
42.651028 141.959442 12.424 2018 9 13 21 41 13.960 0.8
42.661583 142.020615 29.434 2018 9 13 21 42 22.680 0.9
42.756119 142.010788 30.666 2018 9 13 21 58 7.200 0.0
42.547344 141.999649 27.314 2018 9 13 22 17 59.000 1.4
42.695354 142.022552 25.569 2018 9 13 22 19 58.200 1.1
42.630177 142.006454 25.721 2018 9 13 22 31 32.880 0.8
42.715137 142.037857 26.988 2018 9 13 22 45 57.920 1.2
42.602028 141.991852 28.253 2018 9 13 22 58 23.500 1.0
42.697075 141.993057 30.321 2018 9 13 23 28 48.040 0.9
42.565002 141.855667 8.977 2018 9 13 23 36 35.040 0.7
42.699959 141.999069 26.954 2018 9 13 23 48 51.200 0.9
42.709064 142.002472 27.440 2018 9 13 23 52 1.400 0.7
42.763847 141.905548 11.881 2018 9 14 0 9 35.710 0.0
42.672138 141.830048 11.619 2018 9 14 0 15 14.380 0.9
42.614250 141.977509 22.563 2018 9 14 0 30 39.950 1.5
42.713989 141.935638 14.666 2018 9 14 0 44 56.310 0.6
42.586414 141.999359 31.681 2018 9 14 0 50 33.850 1.6
42.638165 142.029449 33.908 2018 9 14 0 59 21.910 1.6
42.627327 142.021149 34.774 2018 9 14 1 6 39.540 1.2
42.624878 141.989761 25.355 2018 9 14 1 8 18.250 1.0
42.607273 142.018143 31.432 2018 9 14 1 53 22.690 1.6
42.656689 142.010422 29.212 2018 9 14 2 8 1.290 1.8
42.622448 141.995132 24.526 2018 9 14 2 13 52.930 1.2
42.621140 142.029327 31.065 2018 9 14 2 19 28.260 1.4
42.682861 142.029968 27.829 2018 9 14 2 42 33.450 0.6
42.716660 141.913635 13.952 2018 9 14 3 0 19.290 1.1
42.691143 142.002472 29.808 2018 9 14 3 3 16.760 0.2
42.680447 142.005035 26.730 2018 9 14 3 36 18.950 1.2
42.604626 141.990036 27.810 2018 9 14 3 47 19.860 0.5
42.626656 141.995087 25.337 2018 9 14 3 52 46.770 1.0
42.693058 141.994995 31.295 2018 9 14 4 10 18.160 0.7
42.693806 142.009293 28.082 2018 9 14 4 32 12.080 0.8
42.609692 141.992554 21.943 2018 9 14 5 24 54.990 0.8
42.638462 142.031631 31.326 2018 9 14 5 26 57.060 1.1
42.681412 141.813354 18.576 2018 9 14 5 27 39.060 1.3
42.668751 142.017776 30.649 2018 9 14 5 43 22.210 0.7
42.688332 142.148712 10.154 2018 9 14 6 13 39.250 0.0
42.672661 141.923645 15.104 2018 9 14 6 52 51.490 1.1
42.668129 141.988785 24.883 2018 9 14 6 54 21.410 4.6
42.664890 141.957718 32.097 2018 9 14 7 5 53.250 0.7
42.601521 141.991699 28.280 2018 9 14 7 32 3.620 1.4
42.582699 141.994385 21.713 2018 9 14 7 36 50.290 1.0
42.704525 142.008957 27.236 2018 9 14 7 43 1.020 1.6
42.668503 141.984741 23.724 2018 9 14 7 44 2.850 1.6
42.609474 141.981110 23.003 2018 9 14 8 8 1.700 2.4
42.696781 141.985489 29.130 2018 9 14 8 22 50.260 0.0
42.580345 141.986252 27.979 2018 9 14 9 7 53.150 0.7
42.693623 142.013428 26.348 2018 9 14 9 14 17.590 0.5
42.637627 141.923645 14.820 2018 9 14 9 28 42.290 0.8
42.791561 142.008316 30.679 2018 9 14 9 48 31.590 4.3
42.643257 142.041595 34.223 2018 9 14 10 5 34.290 1.1
42.737617 142.055756 31.848 2018 9 14 10 30 37.120 0.6
42.697376 141.917450 31.280 2018 9 14 10 48 1.490 0.2
42.562714 141.891724 12.370 2018 9 14 11 4 47.280 1.4
42.634636 142.027023 26.553 2018 9 14 11 12 19.930 1.2
42.761589 142.002243 24.466 2018 9 14 11 40 6.680 1.1
42.595200 141.982986 27.337 2018 9 14 11 57 6.060 1.4
42.679268 142.199432 8.795 2018 9 14 12 3 7.120 0.3
42.671879 141.924866 18.534 2018 9 14 12 17 59.540 0.0
42.599323 142.000671 30.988 2018 9 14 12 40 50.300 1.5
42.626480 142.009201 26.342 2018 9 14 12 52 28.450 1.1
42.685150 141.998169 27.674 2018 9 14 13 20 51.490 1.1
42.601761 141.996872 26.007 2018 9 14 13 39 11.690 1.6
42.755695 142.014801 25.783 2018 9 14 13 53 53.770 0.8
42.626057 142.024826 31.491 2018 9 14 14 2 23.000 0.2
42.677338 141.968399 25.215 2018 9 14 14 5 56.190 0.3
42.598366 141.995193 26.116 2018 9 14 14 8 17.220 1.0
42.742535 141.916443 9.653 2018 9 14 14 33 54.530 1.3
42.699413 142.002335 28.107 2018 9 14 14 48 57.210 1.8
42.730488 141.902603 14.644 2018 9 14 14 53 32.920 1.2
42.638550 141.952881 29.116 2018 9 14 15 12 40.110 0.8
42.645912 142.023941 28.343 2018 9 14 15 43 35.590 1.6
42.611141 141.975357 24.493 2018 9 14 16 36 57.470 0.7
42.587261 141.967438 23.968 2018 9 14 16 49 39.420 0.9
42.694275 142.007370 28.408 2018 9 14 17 3 7.800 2.2
42.612919 142.015732 34.007 2018 9 14 17 31 41.320 4.0
42.706135 141.856888 21.765 2018 9 14 17 37 34.360 1.5
42.597130 142.006546 31.070 2018 9 14 17 44 53.400 0.3
42.581276 141.935486 15.717 2018 9 14 18 16 20.520 1.0
42.626934 142.011536 26.329 2018 9 14 18 17 11.360 0.3
42.572308 141.976181 26.120 2018 9 14 18 27 2.440 0.6
42.602489 142.023010 31.416 2018 9 14 18 34 29.240 1.1
42.630657 142.017914 24.239 2018 9 14 19 3 39.720 1.1
42.782970 142.024567 32.828 2018 9 14 19 14 5.960 0.0
42.602154 142.017075 30.528 2018 9 14 19 38 16.920 1.9
42.801014 142.014328 26.527 2018 9 14 19 39 47.680 1.3
42.613914 141.997009 23.816 2018 9 14 20 1 29.200 1.3
42.694820 141.999496 26.695 2018 9 14 20 6 8.640 1.2
42.586868 141.756088 10.018 2018 9 14 20 37 11.760 0.9
42.717800 142.010025 27.817 2018 9 14 21 3 11.080 1.7
42.746696 142.031479 29.049 2018 9 14 21 22 17.020 1.1
42.654079 142.029037 26.417 2018 9 14 21 23 7.060 1.0
42.566021 141.985565 25.025 2018 9 14 21 27 25.660 1.1
42.686646 141.946503 4.050 2018 9 14 21 34 51.100 0.9
42.678364 142.008408 27.111 2018 9 14 21 50 55.160 0.7
42.667492 142.008484 29.346 2018 9 14 22 6 5.800 0.8
42.608562 141.984787 26.434 2018 9 14 22 18 41.240 1.1
42.659271 142.018188 29.298 2018 9 14 22 20 15.180 1.6
42.621719 142.023438 30.458 2018 9 14 22 44 23.440 0.8
42.564362 141.991943 25.956 2018 9 14 22 44 48.960 1.6
42.635494 142.025558 32.585 2018 9 14 22 59 50.440 1.0
42.670460 141.978439 30.414 2018 9 14 23 5 18.360 0.9
42.755844 141.966003 19.099 2018 9 14 23 7 9.720 1.4
42.727150 141.914154 12.679 2018 9 14 23 9 26.960 1.2
42.651299 142.031448 35.036 2018 9 14 23 10 1.000 1.3
42.653645 142.023331 32.797 2018 9 14 23 11 5.400 1.2
42.682281 142.012146 28.508 2018 9 14 23 36 10.400 0.8
42.678719 142.007874 30.144 2018 9 14 23 37 56.520 1.2
42.607197 142.013351 28.762 2018 9 14 23 47 36.200 0.9
42.713585 141.981125 26.768 2018 9 14 23 57 51.400 0.9
42.626278 142.011032 42.773 2018 9 15 0 8 36.360 1.1
42.589401 142.002716 28.136 2018 9 15 0 11 23.300 0.9
42.598404 141.986893 26.808 2018 9 15 0 25 43.090 0.8
42.767223 141.911713 11.801 2018 9 15 0 35 59.060 1.0
42.681519 142.014435 29.686 2018 9 15 0 39 6.130 2.1
42.624622 142.011063 22.367 2018 9 15 0 46 57.650 0.8
42.781662 142.023666 28.349 2018 9 15 0 54 49.450 1.0
42.603138 141.974396 13.290 2018 9 15 1 9 8.930 0.7
42.669563 142.007431 25.553 2018 9 15 1 12 0.350 0.7
42.622112 141.995178 24.263 2018 9 15 1 21 23.610 1.2
42.607574 142.003433 30.012 2018 9 15 1 23 56.560 2.1
42.715446 142.020996 28.091 2018 9 15 1 24 38.010 1.3
42.750546 142.022659 26.564 2018 9 15 1 32 47.490 0.4
42.674114 142.026962 33.306 2018 9 15 1 37 9.590 0.9
42.605183 141.997482 31.410 2018 9 15 1 42 38.220 0.1
42.622070 142.025513 30.518 2018 9 15 1 47 38.070 0.6
42.635933 141.992462 26.340 2018 9 15 1 49 3.050 1.1
42.583687 141.979324 38.170 2018 9 15 1 51 15.400 0.2
42.720295 142.032959 34.801 2018 9 15 2 3 4.360 0.4
42.683830 142.018463 30.341 2018 9 15 2 10 41.560 1.0
42.711426 142.005463 26.046 2018 9 15 2 11 37.700 0.6
42.722500 142.015915 29.094 2018 9 15 2 14 34.120 2.1
42.667114 142.034027 30.855 2018 9 15 2 21 8.920 1.8
42.580246 141.963760 27.455 2018 9 15 2 21 35.360 1.2
42.575085 142.028976 31.961 2018 9 15 2 33 35.390 0.5
42.604092 141.994049 29.747 2018 9 15 2 36 42.040 0.7
42.611187 142.007828 29.433 2018 9 15 2 50 10.030 0.8
42.733242 142.013596 30.221 2018 9 15 3 6 11.020 2.2
42.613354 141.992676 26.511 2018 9 15 3 29 37.770 0.9
42.564442 141.991989 26.268 2018 9 15 3 36 36.640 1.5
42.722790 141.906204 15.736 2018 9 15 3 48 46.100 2.2
42.664639 141.987320 24.254 2018 9 15 3 57 10.300 1.3
42.695019 141.997314 26.778 2018 9 15 4 8 23.030 0.6
42.670002 142.017288 29.503 2018 9 15 4 15 18.400 2.3
42.798534 142.018677 30.020 2018 9 15 4 18 11.970 0.2
42.623798 141.991028 24.454 2018 9 15 4 27 6.400 1.4
42.725555 141.916046 14.653 2018 9 15 4 27 50.940 2.7
42.716557 141.909714 14.207 2018 9 15 4 32 7.380 0.8
42.723778 141.911575 14.509 2018 9 15 4 40 59.820 1.7
42.603210 141.982681 26.967 2018 9 15 4 42 27.530 0.9
42.658752 141.928329 15.134 2018 9 15 4 48 27.360 1.1
42.618965 141.960617 9.529 2018 9 15 4 53 37.090 0.5
42.637928 142.007614 39.663 2018 9 15 5 21 57.490 1.0
42.772778 141.924072 14.693 2018 9 15 5 22 49.440 1.5
42.617596 142.016891 29.370 2018 9 15 5 23 24.800 1.6
42.722694 141.914001 14.021 2018 9 15 5 28 40.560 1.2
42.648663 141.928711 12.970 2018 9 15 5 41 39.970 0.5
42.722313 141.902588 15.205 2018 9 15 5 51 47.250 2.0
42.720238 141.902756 13.700 2018 9 15 5 52 21.400 1.6
42.750469 142.014893 28.720 2018 9 15 5 59 26.670 1.4
42.716190 141.902802 14.341 2018 9 15 6 1 39.080 1.1
42.725277 141.910355 13.569 2018 9 15 6 10 51.220 0.9
42.732170 141.915070 18.260 2018 9 15 6 16 42.920 1.1
42.669926 142.014587 30.131 2018 9 15 6 19 7.030 0.2
42.716618 142.013412 28.660 2018 9 15 6 32 48.990 2.0
42.611420 142.017303 29.809 2018 9 15 6 36 27.260 1.5
42.805389 142.012848 28.716 2018 9 15 7 23 22.670 1.5
42.719837 141.910370 15.733 2018 9 15 7 49 18.630 2.0
42.658821 141.925217 15.968 2018 9 15 7 51 34.550 0.9
42.657234 142.020737 33.443 2018 9 15 7 52 29.420 1.2
42.589184 141.906006 13.358 2018 9 15 8 9 58.660 0.7
42.708618 142.015045 21.325 2018 9 15 8 29 33.170 1.0
42.715923 141.906387 14.962 2018 9 15 8 56 7.100 1.5
42.666088 142.022858 27.592 2018 9 15 9 24 53.280 1.4
42.671581 142.125885 10.929 2018 9 15 9 29 11.340 0.4
42.657314 142.025360 33.348 2018 9 15 9 34 57.170 1.0
42.714939 142.012192 25.725 2018 9 15 9 48 49.640 0.7
42.619652 141.984619 23.277 2018 9 15 10 29 6.200 0.9
42.620689 142.001556 25.824 2018 9 15 10 55 44.030 2.6
42.715351 141.916061 14.091 2018 9 15 11 45 39.140 1.0
42.723583 141.912064 13.741 2018 9 15 12 9 23.030 0.8
42.746899 142.061966 28.465 2018 9 15 12 24 27.850 0.1
42.683746 142.008255 28.208 2018 9 15 12 34 25.000 0.2
42.631821 142.012741 28.751 2018 9 15 12 44 8.030 0.2
42.585350 141.971481 23.706 2018 9 15 12 48 8.960 0.6
42.576363 141.999176 26.593 2018 9 15 12 51 1.330 0.8
42.654533 142.003525 30.092 2018 9 15 13 5 31.540 0.4
42.642338 142.015945 26.517 2018 9 15 13 24 33.570 0.9
42.727551 141.964584 5.181 2018 9 15 14 1 33.230 1.0
42.777809 142.013367 29.495 2018 9 15 14 2 44.320 1.2
42.720219 142.003723 29.243 2018 9 15 14 2 59.670 2.9
42.671127 141.980301 25.591 2018 9 15 14 7 15.140 0.8
42.584312 142.023468 29.339 2018 9 15 14 42 55.120 1.6
42.615330 142.049774 34.978 2018 9 15 15 26 41.650 0.4
42.663628 141.920197 15.271 2018 9 15 15 27 47.420 2.5
42.659222 141.923706 13.340 2018 9 15 15 31 10.810 1.4
42.680882 142.016235 28.715 2018 9 15 15 50 38.040 1.3
42.661781 141.937775 11.239 2018 9 15 16 8 12.400 0.4
42.686348 142.004395 28.697 2018 9 15 16 34 30.290 1.8
42.715504 142.007355 24.397 2018 9 15 16 48 25.810 0.5
42.666500 142.015533 27.674 2018 9 15 16 54 56.420 0.9
42.704277 141.970322 34.513 2018 9 15 16 57 37.520 0.9
42.603329 142.011414 31.465 2018 9 15 17 7 41.880 1.3
42.685848 142.007568 29.612 2018 9 15 17 19 59.000 2.6
42.633728 141.977737 22.270 2018 9 15 17 21 8.680 1.4
42.691875 142.041992 27.165 2018 9 15 17 24 48.080 0.9
42.641136 142.034286 30.590 2018 9 15 17 25 22.860 0.3
42.671574 142.006119 27.092 2018 9 15 17 40 25.600 0.5
42.694328 141.983215 23.071 2018 9 15 17 45 38.560 0.3
42.570278 142.005173 26.583 2018 9 15 17 46 6.140 0.8
42.605080 142.008148 27.620 2018 9 15 18 16 1.160 0.8
42.675888 142.008774 30.237 2018 9 15 18 23 53.160 2.8
42.628784 142.028168 28.329 2018 9 15 18 36 26.940 0.9
42.677128 141.913742 9.789 2018 9 15 18 49 33.560 0.4
42.718559 141.912064 14.268 2018 9 15 18 52 59.400 1.2
42.690952 142.001465 26.949 2018 9 15 19 11 34.880 0.8
42.602886 141.976151 27.410 2018 9 15 19 24 31.400 0.2
42.663025 142.007935 32.773 2018 9 15 19 33 42.400 0.3
42.630302 142.023514 34.180 2018 9 15 19 37 54.460 4.0
42.725285 141.899612 14.929 2018 9 15 19 42 51.960 0.0
42.724422 141.910568 14.986 2018 9 15 19 46 9.180 1.6
42.605427 142.012878 38.720 2018 9 15 19 53 1.080 0.9
42.608215 142.030792 32.544 2018 9 15 19 55 11.280 0.9
42.606480 141.964508 25.456 2018 9 15 20 19 24.360 0.3
42.645306 142.021988 28.043 2018 9 15 20 20 8.040 1.9
42.683434 142.001892 26.346 2018 9 15 20 21 3.520 1.0
42.517700 142.019577 12.397 2018 9 15 20 25 37.500 1.3
42.532574 142.005234 11.284 2018 9 15 20 26 56.760 1.1
42.667843 141.922699 13.254 2018 9 15 20 33 47.040 1.3
42.665684 141.920044 14.276 2018 9 15 20 42 12.640 1.4
42.606552 141.882965 22.466 2018 9 15 20 52 55.720 1.0
42.653759 142.019653 31.705 2018 9 15 20 59 33.640 1.5
42.714138 141.989914 31.134 2018 9 15 21 21 34.320 1.6
42.617416 142.015671 30.691 2018 9 15 22 0 10.480 0.4
42.595215 141.990295 27.665 2018 9 15 22 19 25.200 0.8
42.672207 141.993393 25.184 2018 9 15 22 24 5.040 0.5
42.763130 142.036942 29.802 2018 9 15 22 26 19.200 0.7
42.642811 142.166779 11.281 2018 9 15 22 57 40.840 0.0
42.600128 141.991318 28.613 2018 9 15 23 5 50.660 0.5
42.740547 142.022659 27.986 2018 9 15 23 35 35.720 0.9
42.599464 141.997253 29.332 2018 9 15 23 44 57.260 0.6
42.657303 142.013824 28.085 2018 9 15 23 54 46.040 2.6
42.719238 141.909271 14.840 2018 9 16 0 5 15.870 0.6
42.700825 141.974838 30.357 2018 9 16 0 27 56.490 0.7
42.657299 142.018707 26.373 2018 9 16 0 31 46.490 0.6
42.677876 141.996246 25.745 2018 9 16 1 4 22.570 0.5
42.583771 142.002396 28.156 2018 9 16 1 36 14.970 0.7
42.656178 142.011917 28.587 2018 9 16 1 49 58.760 0.5
42.723679 142.003342 29.495 2018 9 16 1 57 12.940 0.2
42.721252 142.015259 28.065 2018 9 16 2 13 35.250 1.3
42.645813 142.031784 34.442 2018 9 16 2 30 36.610 0.8
42.683624 141.993683 38.083 2018 9 16 2 48 3.830 1.0
42.631756 142.021011 31.779 2018 9 16 2 53 35.500 0.8
42.672802 142.005569 27.496 2018 9 16 3 0 12.560 0.6
42.661903 142.023621 27.653 2018 9 16 3 20 41.390 1.3
42.634949 142.036331 35.322 2018 9 16 3 44 26.570 1.3
42.716923 141.993652 30.099 2018 9 16 3 55 25.700 0.9
42.701023 142.011124 28.202 2018 9 16 4 34 38.080 1.8
42.732655 142.005310 29.681 2018 9 16 4 44 13.440 1.4
42.776840 142.039093 35.277 2018 9 16 5 2 5.120 0.6
42.545151 141.988800 29.750 2018 9 16 5 5 23.870 1.2
42.803738 142.025009 26.728 2018 9 16 5 30 5.330 1.2
42.628883 141.923462 14.199 2018 9 16 5 32 23.550 0.5
42.675671 141.805573 7.916 2018 9 16 5 48 45.670 1.0
42.665489 141.915787 8.632 2018 9 16 6 12 16.650 0.6
42.583820 142.000336 21.204 2018 9 16 6 17 2.010 1.0
42.569019 142.058334 34.986 2018 9 16 6 56 21.760 0.7
42.678921 142.011703 29.214 2018 9 16 7 2 35.140 2.2
42.579247 141.959381 20.748 2018 9 16 7 18 58.910 1.2
42.694927 142.020309 28.291 2018 9 16 7 40 58.590 1.8
42.677399 142.009720 32.908 2018 9 16 7 42 48.860 1.2
42.789276 142.018661 29.387 2018 9 16 7 47 44.270 2.7
42.612152 142.021484 32.168 2018 9 16 8 16 28.430 0.7
42.694141 141.999054 28.640 2018 9 16 9 12 30.360 1.0
42.728645 142.178314 11.227 2018 9 16 9 16 38.250 0.1
42.603962 142.005096 29.264 2018 9 16 9 19 19.080 0.7
42.680679 142.013504 28.643 2018 9 16 9 21 53.110 0.8
42.766804 142.045547 29.912 2018 9 16 9 37 53.500 1.1
42.729183 141.898743 12.523 2018 9 16 10 36 39.870 0.3
42.589085 141.995850 25.781 2018 9 16 10 42 3.910 0.8
42.689281 141.995178 26.201 2018 9 16 10 55 53.600 2.2
42.627228 141.979462 22.263 2018 9 16 11 14 18.020 1.0
42.812477 142.001480 26.476 2018 9 16 11 19 20.240 0.6
42.680386 142.012543 31.616 2018 9 16 12 9 28.750 1.6
42.796192 142.021927 25.533 2018 9 16 12 9 55.940 1.4
42.603405 142.011505 28.797 2018 9 16 12 45 21.490 0.1
42.753853 142.033340 28.224 2018 9 16 13 11 33.740 1.0
42.798195 141.864807 10.852 2018 9 16 13 42 7.310 0.3
42.720013 141.912048 14.657 2018 9 16 13 44 42.040 1.1
42.685394 141.999756 28.675 2018 9 16 13 58 50.850 1.1
42.634785 142.031509 31.058 2018 9 16 14 4 2.130 1.8
42.706223 141.993515 27.291 2018 9 16 14 10 12.890 1.0
42.631668 142.028320 29.989 2018 9 16 17 5 42.520 1.2
42.662415 142.020859 27.429 2018 9 16 17 37 23.360 0.8
42.599739 141.991440 27.408 2018 9 16 17 49 50.160 1.0
42.783485 142.005310 28.860 2018 9 16 18 13 16.560 0.1
42.806084 141.995193 27.273 2018 9 16 18 19 50.040 0.5
42.707218 142.006226 25.106 2018 9 16 18 24 2.040 0.7
42.592552 141.993103 31.385 2018 9 16 18 24 56.240 2.7
42.637482 142.024200 31.070 2018 9 16 19 8 13.640 0.5
42.619717 142.013779 32.002 2018 9 16 19 18 53.060 0.7
42.696159 142.016037 30.002 2018 9 16 20 50 59.240 0.6
42.770546 142.008682 28.276 2018 9 16 21 0 48.440 0.2
42.681805 142.016953 28.009 2018 9 16 21 16 31.600 1.0
42.680840 141.920212 11.820 2018 9 16 21 29 7.400 0.8
42.776783 141.988205 14.967 2018 9 16 21 35 43.280 0.5
42.613926 141.987061 25.810 2018 9 16 22 4 19.040 0.6
42.627811 141.993240 24.932 2018 9 16 22 25 18.640 1.2
42.414684 142.489731 10.452 2018 9 16 23 23 42.440 0.0
42.781025 142.022308 28.336 2018 9 16 23 27 57.240 0.0
42.675335 142.008698 28.864 2018 9 16 23 51 13.720 3.1
42.797272 142.009125 27.036 2018 9 17 0 23 2.680 0.3
42.804920 142.009872 25.838 2018 9 17 0 31 50.210 0.3
42.716446 142.013947 28.772 2018 9 17 0 36 34.880 1.4
42.596752 141.779938 9.335 2018 9 17 0 59 39.140 0.7
42.573364 141.777496 10.965 2018 9 17 1 1 1.320 0.7
42.631931 142.031387 33.423 2018 9 17 1 2 20.170 1.0
42.597111 141.759705 10.499 2018 9 17 1 9 47.990 0.8
42.693130 141.999130 25.498 2018 9 17 1 13 17.760 0.9
42.665421 142.016464 32.848 2018 9 17 1 15 3.590 1.5
42.652210 141.989838 22.809 2018 9 17 1 29 57.450 0.4
42.611866 141.997742 28.705 2018 9 17 2 5 1.390 0.7
42.680862 142.021194 29.355 2018 9 17 2 9 52.340 3.1
42.598003 142.001190 28.240 2018 9 17 2 12 37.230 0.9
42.567398 141.871460 27.505 2018 9 17 2 30 9.000 0.8
42.643528 142.030731 32.174 2018 9 17 2 31 5.920 1.1
42.667141 142.030716 29.293 2018 9 17 2 42 35.960 0.5
42.709812 141.909714 27.270 2018 9 17 2 51 30.880 4.6
42.708851 141.908005 23.669 2018 9 17 3 3 24.350 0.4
42.707855 141.907471 23.703 2018 9 17 3 22 27.560 0.6
42.704803 141.896500 23.603 2018 9 17 3 43 42.470 0.5
42.796356 142.014984 29.524 2018 9 17 4 7 36.940 2.7
42.697159 142.009094 25.977 2018 9 17 4 14 4.810 0.6
42.802017 142.018158 27.248 2018 9 17 4 29 55.890 1.8
42.689915 141.977478 34.925 2018 9 17 4 38 20.760 0.0
42.714626 141.948990 27.947 2018 9 17 4 57 49.590 0.9
42.706570 141.892563 23.749 2018 9 17 4 59 49.950 1.3
42.732182 142.012054 26.097 2018 9 17 5 11 44.130 0.4
42.684246 142.002731 26.579 2018 9 17 5 17 44.740 0.9
42.616035 141.994263 27.753 2018 9 17 5 35 16.310 0.8
42.711174 141.904449 15.515 2018 9 17 5 49 21.820 1.0
42.617191 142.020218 32.550 2018 9 17 7 30 3.920 1.0
42.804310 142.010590 26.251 2018 9 17 7 36 41.290 1.2
42.802322 142.011398 26.444 2018 9 17 7 49 23.770 0.6
42.664291 142.012222 26.765 2018 9 17 7 57 2.510 0.3
42.620392 142.013046 27.202 2018 9 17 9 33 54.230 0.8
42.596504 141.993286 28.786 2018 9 17 9 37 8.330 1.4
42.794178 142.014725 30.567 2018 9 17 9 40 12.750 1.2
42.621830 142.016495 34.526 2018 9 17 10 0 52.490 0.8
42.794933 142.022324 25.871 2018 9 17 10 40 56.250 1.0
42.696594 142.007416 28.531 2018 9 17 11 21 5.770 1.8
42.588825 141.962585 23.808 2018 9 17 12 34 4.660 1.4
42.710072 142.017197 27.852 2018 9 17 13 6 17.960 2.8
42.626083 142.017029 30.284 2018 9 17 13 37 47.190 0.6
42.738678 142.019775 27.682 2018 9 17 13 43 34.400 1.1
42.688210 142.004013 28.178 2018 9 17 14 4 50.900 1.8
42.720058 142.003601 27.544 2018 9 17 15 11 13.150 2.5
42.802849 142.012604 28.396 2018 9 17 16 3 34.830 2.1
42.718353 142.013733 31.147 2018 9 17 17 46 41.740 1.6
42.593880 142.004257 26.805 2018 9 17 18 16 43.480 1.2
42.663559 141.944244 12.531 2018 9 17 19 56 32.940 0.7
42.603539 141.997314 30.379 2018 9 17 20 29 8.600 1.3
42.633640 142.006729 25.743 2018 9 17 20 37 59.920 1.1
42.591209 142.010696 34.232 2018 9 17 20 51 43.280 1.0
42.800713 142.016769 26.329 2018 9 17 21 16 25.060 0.8
42.656708 142.024994 24.036 2018 9 17 21 16 37.520 0.9
42.766865 142.001511 31.420 2018 9 17 21 27 18.160 2.2
42.625725 142.018204 34.537 2018 9 17 21 49 42.080 2.6
42.588676 141.969421 24.534 2018 9 17 22 14 34.000 1.5
42.610390 141.985718 25.154 2018 9 17 22 28 55.020 0.6
42.688324 142.006058 27.919 2018 9 17 22 44 59.720 0.0
42.673279 142.009003 30.957 2018 9 17 23 0 48.120 0.6
42.701920 142.002319 32.768 2018 9 17 23 1 38.080 1.6
42.724346 142.015762 28.961 2018 9 18 0 42 26.660 2.7
42.723778 142.007416 28.814 2018 9 18 1 1 46.260 0.6
42.627602 142.028305 34.567 2018 9 18 1 14 46.690 1.0
42.811508 141.994507 34.261 2018 9 18 2 46 59.160 0.3
42.649429 142.023483 31.242 2018 9 18 3 1 3.450 1.3
42.644653 142.014236 25.604 2018 9 18 3 16 41.250 1.1
42.752102 141.917542 12.308 2018 9 18 3 21 57.100 1.8
42.623306 141.977432 22.669 2018 9 18 4 0 4.540 1.4
42.653114 142.014755 27.967 2018 9 18 4 8 45.790 2.6
42.751110 141.920593 12.745 2018 9 18 4 20 59.680 1.5
42.835663 141.907959 11.566 2018 9 18 5 11 56.310 0.4
42.570362 142.022583 29.961 2018 9 18 5 17 39.450 0.8
42.696575 141.921127 18.844 2018 9 18 5 38 40.030 1.3
42.652946 141.976166 20.782 2018 9 18 5 38 57.080 0.6
42.806465 142.010941 29.882 2018 9 18 5 40 16.380 3.5
42.684628 141.999466 25.338 2018 9 18 6 14 9.200 1.6
42.617256 142.015610 30.519 2018 9 18 6 16 57.140 1.6
42.744629 142.039581 27.922 2018 9 18 6 36 49.060 1.4
42.771725 142.030472 29.224 2018 9 18 6 42 40.040 3.2
42.680843 141.928970 15.221 2018 9 18 7 42 6.290 0.0
42.694748 142.009186 27.767 2018 9 18 8 28 47.250 1.4
42.660969 142.022186 32.347 2018 9 18 8 39 41.820 0.8
42.830452 141.917557 11.079 2018 9 18 8 51 27.170 1.7
42.747021 142.020248 27.322 2018 9 18 9 40 11.970 1.2
42.690884 142.001770 28.665 2018 9 18 9 49 42.390 1.4
42.663010 141.986328 30.547 2018 9 18 10 19 43.460 1.2
42.690235 142.004578 29.661 2018 9 18 10 48 37.640 0.9
42.677597 141.999054 33.148 2018 9 18 12 37 23.390 1.5
42.666660 142.013977 29.452 2018 9 18 12 38 11.860 2.0
42.621510 142.005798 25.550 2018 9 18 14 1 10.250 0.5
42.690784 142.007690 28.584 2018 9 18 17 1 2.100 1.3
42.678959 141.997116 26.568 2018 9 18 18 18 26.100 1.5
42.711098 142.010544 28.913 2018 9 18 18 26 19.720 1.6
42.561924 141.948471 16.470 2018 9 18 18 35 7.600 1.1
42.681240 142.005402 29.626 2018 9 18 18 38 14.980 1.4
42.735104 142.060745 27.657 2018 9 18 19 10 45.000 2.3
42.608387 142.010345 30.443 2018 9 18 19 35 7.820 1.4
42.697262 142.000931 31.675 2018 9 18 19 40 15.240 1.2
42.720375 142.005432 26.119 2018 9 18 19 45 21.700 0.7
42.603218 141.992493 28.682 2018 9 18 20 6 22.020 1.3
42.755131 142.032852 28.203 2018 9 18 20 7 37.600 0.8
42.656101 141.962921 25.796 2018 9 18 20 21 2.200 1.1
42.598171 141.991364 28.791 2018 9 18 21 4 49.980 0.8
42.798759 142.005951 28.052 2018 9 18 21 10 16.640 1.8
42.660187 141.987579 22.125 2018 9 18 21 37 21.240 1.0
42.657303 142.033401 32.107 2018 9 18 21 57 47.760 0.9
42.677917 142.010300 28.810 2018 9 18 22 14 29.440 1.0
42.589134 141.974686 28.205 2018 9 18 22 43 5.080 1.1
42.591927 141.970825 26.613 2018 9 18 23 31 14.080 0.8
42.690884 142.003479 28.796 2018 9 18 23 57 45.520 1.2
42.059010 142.431976 47.973 2018 9 19 0 1 58.500 0.7
42.655277 142.012909 26.281 2018 9 19 0 9 8.170 0.4
42.694687 142.000977 29.385 2018 9 19 1 15 49.300 0.9
42.599831 141.993851 27.619 2018 9 19 1 28 6.630 1.0
42.685905 142.152176 10.662 2018 9 19 1 30 7.220 0.6
42.619320 142.014832 28.846 2018 9 19 1 59 37.520 1.1
42.648956 142.037262 29.660 2018 9 19 2 47 47.080 0.4
42.646343 141.889771 11.672 2018 9 19 3 6 1.830 1.1
42.685463 142.013321 26.330 2018 9 19 4 34 7.340 1.0
42.698647 142.007889 28.437 2018 9 19 5 44 52.680 1.2
42.647877 142.020813 29.609 2018 9 19 5 48 35.230 0.7
42.796757 142.017624 27.296 2018 9 19 6 30 49.480 1.0
42.737392 142.023438 27.528 2018 9 19 6 48 9.750 1.2
42.679962 142.234055 23.173 2018 9 19 6 57 55.450 0.4
42.664940 141.996399 24.373 2018 9 19 8 4 59.800 1.3
42.678085 141.994736 25.164 2018 9 19 9 42 40.640 2.4
42.580917 141.972641 24.777 2018 9 19 10 40 6.730 2.6
42.674946 141.921814 14.276 2018 9 19 10 41 55.030 1.0
42.682575 141.911285 15.123 2018 9 19 11 1 19.620 1.4
42.604153 141.999435 29.767 2018 9 19 11 20 59.260 0.8
42.573788 141.969788 23.650 2018 9 19 11 25 17.360 1.3
42.673531 142.007523 32.573 2018 9 19 13 16 2.360 0.6
42.646328 142.020355 31.871 2018 9 19 13 22 47.990 1.2
42.651451 142.029312 29.251 2018 9 19 13 51 53.030 0.8
42.827145 141.998856 30.937 2018 9 19 13 53 51.840 0.4
42.614914 141.994034 33.419 2018 9 19 14 47 8.030 0.0
42.770325 142.015869 31.642 2018 9 19 15 21 45.460 3.4
42.673702 142.005402 26.451 2018 9 19 15 26 35.950 1.1
42.592251 141.976105 26.478 2018 9 19 15 46 13.520 0.4
42.597717 141.896622 10.441 2018 9 19 16 34 47.440 1.3
42.568367 141.886200 13.227 2018 9 19 16 55 49.260 1.2
42.695530 142.001801 25.867 2018 9 19 17 20 34.920 1.0
42.707260 141.984131 29.825 2018 9 19 17 28 56.360 1.3
42.650330 142.010971 30.056 2018 9 19 17 41 46.400 1.4
42.608959 141.980515 27.945 2018 9 19 18 14 46.800 0.9
42.709370 141.919556 38.566 2018 9 19 18 32 13.660 1.3
42.645416 142.001404 25.835 2018 9 19 18 47 14.460 0.9
42.665413 141.934738 13.989 2018 9 19 19 27 1.220 1.0
42.670437 141.922256 14.320 2018 9 19 19 28 47.500 0.9
42.563198 141.887817 12.878 2018 9 19 19 37 52.580 1.4
42.643143 142.029297 33.598 2018 9 19 19 58 20.980 2.2
42.678314 142.025040 29.612 2018 9 19 20 17 58.340 1.3
42.723454 141.914444 11.843 2018 9 19 20 23 52.040 0.5
42.633507 141.920746 14.510 2018 9 19 20 34 24.520 1.2
42.672997 142.017639 33.788 2018 9 19 20 35 9.880 0.3
42.756828 142.018631 28.792 2018 9 19 20 43 46.040 2.2
42.570976 141.883301 12.641 2018 9 19 20 47 40.860 1.6
42.641621 141.988739 22.572 2018 9 19 21 14 47.420 1.0
42.579483 141.892639 11.753 2018 9 19 22 8 0.480 1.4
42.667469 142.008560 27.227 2018 9 19 22 26 59.280 0.9
42.735752 142.033066 30.142 2018 9 19 22 49 11.080 0.4
42.654728 142.017975 30.871 2018 9 19 23 3 51.620 0.8
42.816864 141.992981 32.885 2018 9 19 23 38 20.680 0.4
42.620350 142.030182 29.765 2018 9 19 23 55 45.900 0.9
42.670841 141.925583 12.659 2018 9 20 0 14 47.230 0.7
42.591885 141.972916 25.137 2018 9 20 1 0 7.550 1.8
42.474243 141.999847 9.592 2018 9 20 1 52 25.580 0.0
42.673389 141.996048 25.469 2018 9 20 1 54 31.960 2.0
42.516079 142.425598 25.106 2018 9 20 2 7 30.770 0.4
42.699108 142.005859 28.631 2018 9 20 2 16 13.030 1.0
42.681522 141.929993 15.071 2018 9 20 2 35 0.190 1.1
42.615414 141.997513 23.374 2018 9 20 3 2 25.170 0.9
42.740143 141.907608 14.045 2018 9 20 3 22 7.990 0.5
42.611816 141.980377 30.413 2018 9 20 3 37 5.900 0.7
42.615379 142.011002 30.112 2018 9 20 3 59 54.660 1.3
42.582867 141.977997 27.178 2018 9 20 4 10 47.520 1.0
42.719769 142.011597 27.771 2018 9 20 4 26 47.200 1.6
42.726589 141.929916 24.722 2018 9 20 4 35 45.760 1.2
42.727341 141.807022 11.128 2018 9 20 4 36 12.170 1.1
42.661209 141.983444 25.314 2018 9 20 6 16 11.930 0.8
42.700062 141.983093 29.807 2018 9 20 7 1 51.640 0.7
42.687244 142.028229 26.861 2018 9 20 7 17 37.400 1.4
42.745003 141.909424 13.980 2018 9 20 7 18 32.910 1.1
42.669250 142.009888 27.875 2018 9 20 7 45 20.510 1.5
42.635948 142.037811 35.358 2018 9 20 8 15 43.290 1.5
42.656879 142.024734 27.717 2018 9 20 8 16 23.100 1.4
42.575180 141.976044 22.898 2018 9 20 8 38 52.420 0.9
42.614616 142.023468 32.876 2018 9 20 8 46 22.160 0.3
42.591560 142.017822 32.684 2018 9 20 8 58 35.870 0.7
42.598057 141.999054 27.943 2018 9 20 9 15 21.950 1.4
42.654095 142.020111 35.292 2018 9 20 9 57 20.610 0.9
42.726357 141.916031 11.980 2018 9 20 10 37 18.420 0.5
42.652290 142.019241 33.479 2018 9 20 11 35 35.660 1.5
42.702492 141.990494 29.004 2018 9 20 12 2 37.450 0.8
42.676350 142.020859 27.382 2018 9 20 12 51 49.640 0.8
42.618565 142.024872 25.773 2018 9 20 13 35 43.830 0.3
42.612820 142.014236 32.550 2018 9 20 15 7 25.220 1.3
42.602692 141.998566 29.997 2018 9 20 15 33 38.690 2.0
42.736423 141.880005 11.439 2018 9 20 15 37 53.390 1.1
42.584179 142.010452 28.012 2018 9 20 16 26 52.720 1.3
42.619339 141.999176 23.854 2018 9 20 16 38 3.560 1.2
42.713478 141.987701 29.325 2018 9 20 17 0 12.440 1.0
42.694199 142.007385 29.204 2018 9 20 17 11 5.100 1.9
42.577435 141.984848 24.437 2018 9 20 17 25 40.480 1.3
42.491920 141.996552 12.449 2018 9 20 17 40 10.440 1.4
42.608543 141.997223 29.772 2018 9 20 17 54 30.600 1.0
42.687069 142.220276 18.208 2018 9 20 18 23 1.440 0.1
42.708405 142.006699 27.533 2018 9 20 19 31 43.600 0.8
42.662472 141.923111 15.057 2018 9 20 20 47 10.140 1.2
42.850666 141.991867 28.185 2018 9 20 21 6 41.620 0.1
42.796600 142.010071 27.630 2018 9 20 21 12 5.760 0.4
42.685978 141.999176 27.369 2018 9 20 21 15 37.140 0.8
42.626423 142.006714 24.873 2018 9 20 21 18 45.620 0.7
42.689804 142.006607 28.524 2018 9 20 22 15 43.720 0.8
42.723934 142.001099 26.442 2018 9 20 22 21 26.220 0.7
42.603573 142.007721 31.783 2018 9 20 22 31 40.300 2.2
42.787251 141.940231 16.808 2018 9 20 22 41 18.720 0.7
42.678722 142.099915 7.532 2018 9 20 22 44 40.440 0.4
42.607414 141.984100 25.351 2018 9 20 23 2 7.200 0.8
42.677364 141.902985 21.748 2018 9 20 23 3 59.160 0.4
42.663616 141.978928 28.734 2018 9 20 23 4 22.920 0.7
42.588223 141.988663 27.052 2018 9 20 23 7 25.700 1.1
42.693588 142.000870 32.503 2018 9 20 23 30 33.240 0.2
42.778481 142.028763 27.389 2018 9 20 23 37 56.680 0.8
42.645828 142.022003 32.471 2018 9 20 23 38 26.540 0.5
42.562843 141.882126 11.232 2018 9 20 23 44 34.240 1.0
42.673374 141.993256 26.203 2018 9 21 0 15 23.290 2.7
42.692753 142.003906 27.023 2018 9 21 0 24 23.970 1.0
42.798050 142.008453 27.265 2018 9 21 0 42 56.110 0.7
42.712139 142.009247 35.247 2018 9 21 1 0 24.070 0.5
42.781719 141.933167 17.005 2018 9 21 1 25 34.580 0.6
42.685703 142.016190 27.404 2018 9 21 1 38 21.080 1.0
42.729687 142.019882 26.936 2018 9 21 1 40 28.690 0.9
42.679955 141.905350 12.602 2018 9 21 1 49 48.830 0.4
42.707336 142.007904 24.698 2018 9 21 2 50 21.040 1.0
42.653454 141.962418 17.785 2018 9 21 3 23 16.810 1.0
42.664406 142.021210 25.958 2018 9 21 3 25 15.930 0.8
42.626408 141.978012 25.053 2018 9 21 4 29 48.070 0.3
42.759750 142.047562 28.386 2018 9 21 4 31 18.480 0.9
42.764355 142.032806 30.218 2018 9 21 5 17 23.380 0.9
42.690929 142.004181 27.748 2018 9 21 6 7 4.620 1.6
42.616001 141.975708 22.844 2018 9 21 6 47 5.060 0.6
42.642738 142.020935 30.584 2018 9 21 6 54 34.710 1.9
42.697437 141.977173 27.272 2018 9 21 7 48 31.010 0.6
42.635059 142.024658 30.975 2018 9 21 7 56 7.670 4.2
42.556396 142.121109 23.340 2018 9 21 8 6 54.050 0.9
42.768650 141.995697 26.705 2018 9 21 8 9 32.620 1.0
42.638371 142.020386 28.565 2018 9 21 8 9 58.590 0.1
42.641758 142.014130 25.952 2018 9 21 8 33 55.860 0.2
42.627384 142.025925 29.341 2018 9 21 8 57 21.240 0.7
42.726891 142.009750 26.830 2018 9 21 8 58 15.540 0.8
42.613491 141.977005 22.825 2018 9 21 9 22 17.970 0.5
42.641399 142.021835 27.854 2018 9 21 10 28 36.440 1.0
42.613747 141.997742 26.168 2018 9 21 12 42 10.210 1.5
42.663082 142.005814 32.617 2018 9 21 12 50 39.430 1.4
42.583565 142.023895 29.341 2018 9 21 13 22 36.670 0.9
42.648258 142.060150 34.123 2018 9 21 13 38 59.380 0.7
42.754913 142.028259 27.498 2018 9 21 13 58 49.840 0.7
42.644196 142.020920 33.637 2018 9 21 14 49 42.000 1.0
42.718090 141.915054 5.491 2018 9 21 15 7 5.100 0.4
42.688210 142.010544 29.724 2018 9 21 15 14 34.460 1.9
42.672718 142.016342 29.770 2018 9 21 16 48 53.130 2.9
42.671299 142.015671 29.654 2018 9 21 17 26 34.720 2.4
42.667835 141.999435 32.083 2018 9 21 17 27 18.980 1.3
42.696526 141.977493 34.607 2018 9 21 17 30 20.640 0.2
42.647205 142.034973 28.260 2018 9 21 17 40 8.440 1.4
42.638592 142.047913 29.397 2018 9 21 17 51 14.260 0.5
42.600914 141.987946 28.259 2018 9 21 18 5 36.720 2.2
42.648670 142.035767 31.782 2018 9 21 18 30 20.600 0.6
42.654228 141.956635 12.541 2018 9 21 18 43 53.240 0.8
42.660812 142.009613 27.250 2018 9 21 18 46 35.800 1.7
42.621410 142.014114 25.459 2018 9 21 18 47 2.220 2.2
42.614201 141.994354 25.055 2018 9 21 19 10 22.200 0.6
42.603733 141.985901 28.543 2018 9 21 19 35 6.400 0.7
42.681175 142.000565 29.772 2018 9 21 20 12 43.200 0.7
42.749451 141.894424 10.676 2018 9 21 20 19 43.880 1.2
42.666168 142.013641 27.866 2018 9 21 20 37 49.640 1.4
42.587727 142.004608 29.030 2018 9 21 20 49 32.560 0.8
42.708096 142.005173 25.706 2018 9 21 20 50 10.320 0.3
42.587620 141.922211 12.813 2018 9 21 20 58 48.160 1.6
42.601177 142.012848 30.383 2018 9 21 21 22 17.260 1.3
42.723320 141.999054 24.371 2018 9 21 21 35 21.420 0.9
42.659172 142.019577 28.221 2018 9 21 22 46 36.440 0.0
42.786068 141.944214 16.739 2018 9 21 23 11 57.760 1.1
42.588570 142.005051 23.001 2018 9 21 23 27 19.360 0.7
42.781872 141.942459 17.547 2018 9 21 23 35 1.760 0.7
42.683121 142.013458 28.672 2018 9 22 0 17 44.630 1.6
42.678661 142.009109 28.332 2018 9 22 0 47 31.350 0.9
42.713722 142.002853 26.888 2018 9 22 0 53 12.830 1.0
42.593357 141.981857 26.125 2018 9 22 0 56 34.660 1.1
42.633598 142.007126 26.826 2018 9 22 1 13 4.170 2.5
42.611851 141.975037 24.134 2018 9 22 1 13 34.100 2.0
42.713280 142.002823 30.235 2018 9 22 1 33 20.560 1.0
42.676804 141.988815 26.385 2018 9 22 1 35 37.350 0.0
42.678288 142.012665 29.980 2018 9 22 2 2 4.210 1.3
42.702854 142.009018 28.022 2018 9 22 2 13 45.750 1.2
42.679180 142.016602 33.231 2018 9 22 3 35 37.500 2.3
42.734940 142.016907 27.568 2018 9 22 3 51 12.110 0.7
42.583805 141.979874 21.476 2018 9 22 5 2 52.210 1.3
42.779434 142.000427 30.199 2018 9 22 5 10 23.280 2.1
42.631325 141.979462 28.875 2018 9 22 5 21 3.630 1.1
42.802601 142.008209 26.883 2018 9 22 5 56 11.940 0.9
42.788982 141.934280 15.506 2018 9 22 6 30 45.320 1.4
42.674732 142.005661 24.860 2018 9 22 6 35 4.940 0.8
42.761028 142.025375 27.236 2018 9 22 6 47 16.910 0.9
42.719345 142.019531 28.747 2018 9 22 7 3 10.720 2.6
42.645081 142.023376 28.469 2018 9 22 7 3 40.900 2.2
42.666969 141.994781 25.196 2018 9 22 8 57 5.430 1.3
42.644764 142.020828 28.391 2018 9 22 10 38 35.670 1.3
42.787178 141.934509 15.084 2018 9 22 10 39 8.010 1.2
42.786217 141.938095 17.047 2018 9 22 10 40 36.650 1.6
42.778980 141.937622 17.321 2018 9 22 10 40 52.670 1.7
42.691628 142.010330 27.979 2018 9 22 11 0 57.390 1.4
42.787128 141.932541 14.459 2018 9 22 11 17 1.750 1.3
42.670616 141.972458 23.120 2018 9 22 11 27 5.000 2.1
42.704044 141.998276 25.708 2018 9 22 11 45 57.370 1.3
42.706646 141.996719 24.671 2018 9 22 12 8 19.160 1.3
42.785336 141.934372 15.316 2018 9 22 12 10 46.790 1.2
42.786972 141.934311 15.965 2018 9 22 12 46 25.280 0.9
42.803921 142.023666 26.748 2018 9 22 12 54 40.500 1.3
42.642521 142.033173 34.657 2018 9 22 14 33 5.600 1.4
42.728828 141.995026 24.758 2018 9 22 19 18 35.400 0.6
42.673199 142.008408 33.081 2018 9 22 20 23 44.580 1.3
42.623684 141.974243 22.512 2018 9 22 21 31 1.260 1.2
42.691822 142.119400 9.257 2018 9 22 22 49 39.340 0.0
42.699566 142.006454 27.363 2018 9 22 23 13 56.120 1.3
42.776203 142.026138 27.815 2018 9 22 23 20 27.000 1.9
42.615479 142.011597 30.302 2018 9 22 23 44 13.440 0.0
42.693882 142.012009 27.379 2018 9 23 1 11 17.590 1.6
42.628380 142.027405 29.857 2018 9 23 1 41 51.170 1.5
42.733868 142.001129 25.795 2018 9 23 1 55 53.000 1.2
42.759678 141.964981 17.693 2018 9 23 2 1 11.640 1.3
42.594013 142.030991 28.137 2018 9 23 2 36 34.840 1.4
42.572037 142.079605 26.498 2018 9 23 3 17 9.370 0.9
42.655544 142.023102 30.855 2018 9 23 3 51 56.100 0.0
42.561584 141.991959 20.131 2018 9 23 4 19 12.830 1.2
42.754406 142.016312 28.994 2018 9 23 4 41 3.960 1.4
42.697697 142.006210 27.447 2018 9 23 5 0 36.540 1.1
42.646534 141.949066 13.927 2018 9 23 6 30 6.100 0.0
42.535591 141.955902 16.805 2018 9 23 6 55 7.230 1.4
42.623367 142.025589 30.125 2018 9 23 7 42 19.310 1.1
42.699001 142.001968 29.059 2018 9 23 8 21 10.330 0.8
42.712109 142.025635 26.844 2018 9 23 8 21 39.440 1.7
42.690334 142.004868 27.740 2018 9 23 9 28 39.220 1.2
42.774326 142.016052 29.977 2018 9 23 9 41 33.280 1.0
42.735386 142.026108 29.952 2018 9 23 9 42 52.310 1.0
42.687943 142.014069 26.235 2018 9 23 10 9 2.710 1.1
42.754299 142.038849 31.943 2018 9 23 10 17 0.250 2.3
42.718288 142.002441 25.176 2018 9 23 10 19 37.830 1.1
42.737591 141.782990 19.399 2018 9 23 10 23 55.940 1.3
42.781471 142.031021 28.236 2018 9 23 10 41 26.630 2.0
42.167503 142.497009 44.784 2018 9 23 11 33 46.030 0.6
42.682705 141.977402 23.257 2018 9 23 11 46 26.160 1.5
42.654659 142.016785 30.191 2018 9 23 12 21 22.750 1.2
42.804108 142.027008 27.861 2018 9 23 13 13 16.230 1.9
42.600643 142.006821 34.176 2018 9 23 13 21 21.000 0.8
42.667751 141.995316 25.103 2018 9 23 14 13 28.890 1.6
42.663250 142.020309 32.825 2018 9 23 14 40 42.520 1.4
42.624050 142.016479 32.393 2018 9 23 15 42 52.520 1.0
42.685249 142.004364 31.108 2018 9 23 16 27 31.270 1.1
42.800991 142.009460 26.079 2018 9 23 16 39 4.250 0.6
42.667255 141.956802 13.754 2018 9 23 17 7 6.600 0.6
42.691280 142.008408 27.114 2018 9 23 17 7 39.320 0.9
42.686695 141.987900 24.522 2018 9 23 19 35 27.880 1.4
42.796219 142.008347 27.698 2018 9 23 20 8 13.420 0.8
42.494003 142.042007 15.224 2018 9 23 20 30 4.720 1.1
42.517967 142.026596 24.379 2018 9 23 20 46 28.400 1.3
42.807114 142.006149 29.037 2018 9 23 21 56 15.280 0.7
42.661304 142.009308 32.703 2018 9 23 22 2 52.480 0.8
42.619247 142.030762 34.906 2018 9 23 22 18 13.560 0.8
42.740448 142.019821 27.880 2018 9 23 22 27 51.080 0.6
42.672516 141.994171 25.194 2018 9 23 22 41 49.940 1.0
42.684647 142.003998 28.591 2018 9 23 22 47 28.760 1.1
42.603786 142.019150 34.206 2018 9 23 23 15 35.520 1.0
42.746330 141.908386 10.048 2018 9 24 0 7 37.550 1.3
42.637604 141.987030 27.964 2018 9 24 0 46 59.640 0.5
42.714024 142.009583 27.535 2018 9 24 0 54 8.030 1.2
42.609871 141.997803 28.193 2018 9 24 1 42 50.920 0.8
42.724590 142.006851 30.807 2018 9 24 2 53 5.210 2.0
42.604618 142.018219 29.948 2018 9 24 3 24 39.240 1.1
42.720615 142.012085 27.641 2018 9 24 3 27 59.710 0.8
42.617630 142.028214 29.525 2018 9 24 4 24 37.610 1.5
42.697567 142.005463 26.984 2018 9 24 4 36 43.000 1.2
42.665100 142.017670 26.252 2018 9 24 5 53 55.620 1.0
42.750019 141.930969 12.634 2018 9 24 6 0 28.200 0.8
42.716202 141.907455 15.769 2018 9 24 6 0 40.260 2.8
42.712654 141.918594 14.223 2018 9 24 6 6 32.480 1.0
42.656742 142.029755 33.704 2018 9 24 6 54 32.840 1.5
42.724560 141.911041 13.702 2018 9 24 8 50 11.750 1.4
42.699589 141.957550 16.374 2018 9 24 10 22 46.410 0.5
42.586521 141.989792 25.213 2018 9 24 10 30 53.980 1.0
42.690178 142.014709 26.801 2018 9 24 10 39 51.280 1.0
42.708633 142.015274 25.325 2018 9 24 12 47 59.230 0.8
42.718136 141.905792 14.298 2018 9 24 13 11 1.800 0.7
42.572174 141.980942 22.850 2018 9 24 13 46 1.630 1.5
42.648460 142.037735 29.763 2018 9 24 13 50 3.920 0.8
42.660229 142.015778 27.370 2018 9 24 15 17 25.020 1.0
42.597553 141.996826 28.803 2018 9 24 15 35 34.930 0.6
42.607742 141.985199 22.727 2018 9 24 15 39 27.970 1.4
42.689137 141.995789 27.844 2018 9 24 16 13 28.540 0.3
42.631866 142.029648 35.608 2018 9 24 18 17 5.360 4.3
42.672363 142.011139 26.344 2018 9 24 18 22 33.340 1.2
42.640728 142.013947 34.741 2018 9 24 18 44 39.140 1.0
42.748165 142.025940 28.259 2018 9 24 18 46 51.240 0.8
42.743790 142.019989 28.893 2018 9 24 18 49 32.080 1.5
42.668861 142.017715 27.109 2018 9 24 19 1 46.280 1.2
42.642124 142.025116 30.666 2018 9 24 19 40 28.640 2.2
42.808510 141.989014 26.731 2018 9 24 20 45 44.640 0.5
42.574085 141.993683 20.964 2018 9 24 21 17 4.160 1.1
42.670967 141.995117 24.795 2018 9 24 21 45 28.860 1.5
42.596699 141.987808 35.981 2018 9 24 21 50 4.520 1.0
42.604118 141.996124 28.816 2018 9 24 22 24 18.440 0.8
42.649326 142.019302 30.961 2018 9 24 22 41 41.660 2.4
42.680828 142.002228 28.071 2018 9 24 23 57 41.760 2.4
42.687660 141.983383 24.165 2018 9 25 0 2 3.930 1.2
42.718395 142.005905 24.383 2018 9 25 0 40 3.140 0.8
42.801674 142.010513 29.350 2018 9 25 1 16 0.350 2.1
42.581146 141.979034 25.722 2018 9 25 2 33 37.270 1.0
42.579788 141.977890 20.969 2018 9 25 2 58 41.060 1.2
42.805946 142.012741 27.831 2018 9 25 3 12 2.500 1.4
42.785480 141.934967 15.598 2018 9 25 3 26 33.090 0.9
42.788715 141.936295 15.281 2018 9 25 3 29 25.170 0.8
42.717026 142.002258 26.546 2018 9 25 4 22 12.800 1.0
42.567703 141.921646 24.546 2018 9 25 4 23 7.850 1.5
42.599144 141.955276 16.610 2018 9 25 4 24 8.630 1.3
42.659878 142.087692 14.535 2018 9 25 4 50 45.300 0.0
42.591908 141.975800 23.790 2018 9 25 4 54 0.450 1.4
42.589489 142.052048 29.549 2018 9 25 5 1 10.080 1.2
42.635788 142.003662 26.746 2018 9 25 5 13 53.620 0.5
42.659306 141.988846 22.964 2018 9 25 5 23 57.910 0.9
42.583584 141.996643 24.180 2018 9 25 5 27 0.210 1.1
42.662163 142.022751 28.544 2018 9 25 5 46 14.180 0.9
42.707741 142.008545 26.271 2018 9 25 7 56 34.390 1.1
42.663845 142.026611 28.733 2018 9 25 9 8 33.850 0.8
42.718693 142.012466 29.257 2018 9 25 9 48 26.390 1.5
42.755474 141.913406 12.688 2018 9 25 10 24 18.270 1.6
42.661182 141.981598 23.250 2018 9 25 10 45 44.380 1.3
42.600174 142.002304 28.674 2018 9 25 11 58 24.420 2.1
42.747292 141.926636 13.208 2018 9 25 12 55 54.560 0.6
42.614693 141.888016 27.292 2018 9 25 12 57 59.410 1.0
42.762020 142.023529 26.919 2018 9 25 14 24 1.330 0.6
42.797550 142.012390 26.238 2018 9 25 15 7 48.360 1.1
42.773815 142.006744 29.449 2018 9 25 17 16 4.800 2.4
42.773891 142.002350 32.156 2018 9 25 19 0 5.040 3.2
42.673927 142.003754 26.768 2018 9 25 19 7 3.000 2.4
42.152737 142.429916 27.871 2018 9 25 19 39 49.200 0.3
42.686939 142.021591 28.351 2018 9 25 20 18 23.640 1.8
42.645302 142.023697 29.415 2018 9 25 21 37 13.360 1.0
42.586864 141.954468 17.018 2018 9 25 21 40 47.880 1.1
42.611137 142.008102 28.977 2018 9 25 22 43 17.480 0.7
42.638195 142.009811 39.571 2018 9 25 23 14 50.760 0.3
42.032310 142.548035 38.966 2018 9 25 23 35 34.700 0.5
42.703648 142.126785 10.687 2018 9 25 23 38 41.960 0.8
42.692482 142.003983 27.744 2018 9 25 23 39 19.320 0.7
42.717033 142.004852 27.192 2018 9 26 0 21 31.240 0.8
42.652893 142.210022 9.853 2018 9 26 0 22 2.170 0.6
42.600861 141.972061 25.771 2018 9 26 1 0 16.980 0.9
42.726852 141.934601 19.506 2018 9 26 1 2 50.960 0.9
42.750397 141.965179 18.331 2018 9 26 1 34 2.300 0.7
42.671890 141.997391 29.943 2018 9 26 1 53 31.830 0.4
42.661369 142.036072 28.674 2018 9 26 3 21 3.160 0.5
42.639404 141.989319 25.740 2018 9 26 3 22 0.800 0.0
42.651226 142.037933 31.187 2018 9 26 4 38 6.520 1.0
42.655632 141.969894 34.850 2018 9 26 4 38 52.130 0.8
42.666023 142.009857 24.323 2018 9 26 4 46 38.480 0.8
42.709629 142.007874 26.549 2018 9 26 5 2 58.520 0.9
42.740597 142.023010 27.369 2018 9 26 5 22 43.300 1.5
42.758617 141.930054 6.468 2018 9 26 5 24 22.020 0.7
42.672405 142.010605 32.436 2018 9 26 5 40 38.490 0.7
42.699986 142.126328 9.437 2018 9 26 6 31 2.000 1.3
42.592133 141.998825 26.876 2018 9 26 7 44 41.680 0.5
42.665524 141.986481 24.369 2018 9 26 8 17 29.780 1.5
42.578968 142.060974 29.810 2018 9 26 10 5 15.290 0.8
42.794697 142.031937 28.298 2018 9 26 10 28 35.080 1.9
42.690845 141.997940 31.435 2018 9 26 10 34 6.330 1.1
42.590836 142.018143 28.846 2018 9 26 10 40 39.320 0.9
42.733410 142.031387 27.915 2018 9 26 12 34 4.570 1.4
42.663364 141.990845 25.093 2018 9 26 12 53 24.170 2.1
42.665844 142.017227 33.335 2018 9 26 14 40 36.770 2.8
42.563301 141.951218 16.373 2018 9 26 15 39 32.230 1.2
42.703423 141.992981 33.581 2018 9 26 16 48 13.920 1.3
42.662193 141.941147 16.375 2018 9 26 18 52 58.840 1.2
42.668179 142.018936 25.870 2018 9 26 19 35 9.520 0.6
42.561615 141.877533 11.111 2018 9 26 21 18 24.680 0.9
42.733467 141.969070 39.416 2018 9 26 21 39 31.840 0.0
42.591999 141.994537 27.386 2018 9 26 22 8 49.520 0.7
42.668941 141.997650 23.567 2018 9 26 22 26 39.280 0.8
42.597240 142.059692 23.018 2018 9 26 22 51 37.280 0.9
42.565937 142.010040 27.863 2018 9 26 23 5 38.800 1.3
42.561981 141.935760 26.970 2018 9 26 23 44 37.000 0.9
42.785816 142.168472 13.462 2018 9 26 23 55 3.040 0.8
42.687893 142.003464 28.059 2018 9 27 1 32 22.190 0.8
42.563347 141.806046 2.858 2018 9 27 1 38 39.370 0.8
42.640167 141.834946 11.768 2018 9 27 1 42 12.190 1.1
42.592434 142.001114 20.443 2018 9 27 1 45 54.190 0.9
42.749069 141.895874 15.374 2018 9 27 2 11 0.610 0.9
42.679577 142.003891 25.529 2018 9 27 2 34 8.680 0.3
42.708698 142.030289 27.167 2018 9 27 2 39 53.010 2.1
42.675369 142.035751 30.954 2018 9 27 2 53 28.760 2.4
42.816692 142.016525 26.550 2018 9 27 2 57 20.420 1.2
42.746338 141.918427 12.658 2018 9 27 4 2 12.900 0.9
42.682102 142.016937 26.770 2018 9 27 4 7 45.660 0.8
42.659378 142.020111 30.298 2018 9 27 4 29 6.400 1.3
42.634903 142.016983 22.016 2018 9 27 4 42 4.250 1.0
42.616127 141.988205 27.588 2018 9 27 5 7 42.550 1.1
42.728153 141.791306 5.514 2018 9 27 5 38 37.460 0.0
42.778278 142.025879 28.645 2018 9 27 5 38 56.200 1.4
42.621216 141.842697 11.169 2018 9 27 5 48 10.940 1.3
42.578918 142.033585 30.939 2018 9 27 6 13 56.370 3.3
42.756924 141.898300 12.921 2018 9 27 7 2 12.360 1.4
42.801704 142.048599 24.653 2018 9 27 7 47 56.830 1.2
42.784546 142.006073 29.114 2018 9 27 8 12 43.930 1.0
42.780441 141.877045 2.270 2018 9 27 9 6 44.800 1.4
42.734627 142.005936 30.236 2018 9 27 11 5 28.220 1.6
42.564705 141.998474 20.348 2018 9 27 11 47 37.740 1.6
42.688095 141.866089 21.573 2018 9 27 11 58 50.710 1.1
42.567261 142.023529 28.214 2018 9 27 12 11 6.440 2.1
42.595238 141.964615 14.092 2018 9 27 12 57 34.590 1.1
42.582561 141.920410 15.728 2018 9 27 13 38 10.940 2.0
42.679974 141.985352 31.093 2018 9 27 14 3 49.540 0.6
42.708675 142.019745 29.390 2018 9 27 14 34 6.100 0.9
42.513573 142.463745 14.197 2018 9 27 16 1 8.740 0.8
42.718147 142.011047 29.144 2018 9 27 16 24 52.830 2.6
42.728607 142.011765 29.200 2018 9 27 19 26 3.420 1.6
42.671741 142.004440 26.971 2018 9 27 20 34 47.840 2.3
42.682896 142.091507 7.991 2018 9 27 21 35 38.140 0.7
42.647297 142.033249 31.321 2018 9 27 21 38 9.880 1.1
42.684975 142.005432 27.783 2018 9 27 22 16 5.500 1.0
42.598618 141.963409 24.585 2018 9 27 22 30 28.020 1.3
42.620434 142.023026 31.296 2018 9 27 22 50 50.760 0.9
42.582115 142.004013 27.832 2018 9 27 23 22 15.280 0.9
42.614723 142.002106 25.328 2018 9 27 23 26 33.380 1.1
42.636955 141.999893 30.646 2018 9 27 23 34 22.920 0.8
42.672707 142.028152 29.484 2018 9 28 0 13 55.810 1.2
42.631237 141.999649 23.791 2018 9 28 0 37 59.820 1.1
42.562405 141.998886 25.524 2018 9 28 1 8 40.560 1.1
42.406933 141.891907 15.833 2018 9 28 2 43 8.000 1.2
42.615444 142.019608 30.821 2018 9 28 3 56 36.790 1.6
42.680061 141.897278 12.131 2018 9 28 4 42 9.070 1.1
42.632431 141.976547 27.858 2018 9 28 5 58 43.190 0.9
42.662743 142.033127 35.596 2018 9 28 6 0 19.130 1.5
42.677025 141.908676 13.463 2018 9 28 6 5 1.500 2.3
42.618217 141.830994 26.582 2018 9 28 6 31 39.560 1.1
42.800785 142.001923 33.723 2018 9 28 6 35 16.770 1.4
42.694141 141.994049 29.326 2018 9 28 6 57 32.680 0.8
42.665905 142.030090 27.493 2018 9 28 7 15 8.550 1.1
42.687515 142.008957 28.050 2018 9 28 8 29 26.930 1.6
42.676220 141.918076 12.522 2018 9 28 8 52 20.120 1.4
42.725174 142.014679 29.988 2018 9 28 9 14 37.120 1.0
42.673767 141.915115 11.935 2018 9 28 9 33 10.260 1.2
42.707996 142.003433 28.222 2018 9 28 10 53 3.350 1.3
42.705513 141.991196 32.570 2018 9 28 14 1 10.710 1.4
42.650394 141.789368 17.773 2018 9 28 14 45 21.460 0.0
42.685162 142.012344 28.761 2018 9 28 15 4 13.120 1.2
42.660336 141.979004 22.007 2018 9 28 16 51 22.900 1.0
42.657291 142.004837 31.564 2018 9 28 17 44 14.160 0.0
42.713570 141.907623 14.181 2018 9 28 18 45 12.000 1.0
42.798946 142.021179 26.389 2018 9 28 20 1 8.160 1.4
42.569267 142.010941 11.846 2018 9 28 20 8 58.760 0.7
42.685555 141.994904 26.669 2018 9 28 20 57 53.160 1.3
42.625198 142.034210 10.991 2018 9 28 22 47 49.640 0.8
42.677803 141.903702 12.407 2018 9 28 22 51 55.280 1.2
42.654354 142.018158 29.519 2018 9 28 23 30 6.020 0.8
42.696415 142.005661 27.900 2018 9 29 0 53 52.610 1.6
42.716839 142.014221 27.100 2018 9 29 2 9 0.390 0.7
42.758194 141.929642 10.455 2018 9 29 3 24 5.900 0.7
42.810200 142.004929 26.906 2018 9 29 4 42 33.700 0.5
42.623055 142.020981 30.323 2018 9 29 6 7 11.380 1.2
42.667961 142.030273 29.821 2018 9 29 7 4 44.060 1.2
42.612297 142.019394 30.898 2018 9 29 7 38 30.860 1.1
42.648479 142.029892 26.125 2018 9 29 9 1 30.870 1.0
42.619221 142.029037 32.895 2018 9 29 12 7 2.640 1.4
42.793221 141.895615 28.645 2018 9 29 12 54 56.280 0.9
42.655991 142.019852 27.725 2018 9 29 13 1 41.330 1.4
42.642670 142.020554 31.538 2018 9 29 14 10 13.480 1.8
42.691639 141.997940 31.175 2018 9 29 15 53 33.890 0.0
42.806938 141.975845 37.292 2018 9 29 16 19 9.550 0.9
42.635929 142.041534 26.791 2018 9 29 17 24 28.780 1.2
42.607571 141.986801 29.161 2018 9 29 18 6 15.400 0.3
42.742718 141.873215 13.742 2018 9 29 18 14 46.000 0.8
42.678429 141.994675 24.576 2018 9 29 18 16 7.260 1.0
42.685909 142.006866 29.427 2018 9 29 18 19 20.240 0.7
42.758739 142.016571 29.948 2018 9 29 18 25 53.860 4.2
42.594086 141.982620 24.477 2018 9 29 18 57 56.640 0.7
42.606609 142.004150 29.159 2018 9 29 19 1 8.480 1.9
42.693882 141.997604 31.381 2018 9 29 19 4 4.020 0.7
42.638771 142.015945 28.546 2018 9 29 19 19 54.680 1.0
42.805965 142.014313 24.097 2018 9 29 19 59 17.040 1.1
42.726910 141.899765 12.449 2018 9 29 20 12 54.600 0.8
42.628193 142.031067 31.053 2018 9 29 20 26 29.800 1.3
42.611027 141.960464 35.725 2018 9 29 20 28 38.560 0.6
42.417274 141.921844 13.631 2018 9 29 20 35 37.000 1.2
42.590374 142.000748 30.476 2018 9 29 21 2 29.820 0.9
42.732155 141.905075 13.408 2018 9 29 22 3 38.360 0.7
42.574497 141.895050 11.347 2018 9 29 22 10 24.640 1.6
42.670345 142.017654 27.073 2018 9 29 22 43 19.280 0.6
42.706577 141.985519 28.069 2018 9 29 23 25 28.720 0.5
42.542316 141.877274 8.750 2018 9 30 1 6 8.640 1.1
42.655563 142.024567 31.441 2018 9 30 1 30 50.900 0.7
42.577045 141.904373 11.905 2018 9 30 1 48 42.620 1.4
42.611320 142.043564 33.572 2018 9 30 2 12 43.100 1.1
42.554935 141.929016 15.306 2018 9 30 2 33 17.750 1.1
42.542446 141.906845 13.824 2018 9 30 2 34 8.850 0.8
42.540913 141.910141 14.252 2018 9 30 2 34 14.910 1.2
42.632843 142.057205 36.386 2018 9 30 2 51 59.080 1.0
42.627151 141.941589 15.969 2018 9 30 3 14 34.400 1.3
42.673244 142.013153 28.355 2018 9 30 3 27 8.460 0.6
42.812977 142.010910 25.807 2018 9 30 5 5 20.310 0.4
42.600742 142.081100 11.786 2018 9 30 5 45 10.930 1.3
42.797768 142.019928 28.096 2018 9 30 7 10 41.650 2.1
42.756699 142.061783 15.540 2018 9 30 7 39 45.460 0.1
42.605114 142.000153 27.784 2018 9 30 7 56 36.930 1.1
42.606083 141.876205 13.531 2018 9 30 7 58 8.420 1.0
42.617081 142.041504 30.957 2018 9 30 8 3 50.160 1.1
42.595982 141.998978 27.040 2018 9 30 8 17 10.520 1.3
42.555916 141.885956 11.824 2018 9 30 8 42 53.010 1.6
42.732582 142.001541 26.503 2018 9 30 9 11 24.530 0.8
42.710510 142.005325 27.448 2018 9 30 10 37 34.980 1.0
42.603752 141.999634 30.003 2018 9 30 11 3 44.120 1.2
42.629078 142.024948 31.365 2018 9 30 11 25 50.560 1.4
42.783035 142.006149 28.834 2018 9 30 11 26 2.480 1.6
42.694225 142.005920 29.435 2018 9 30 11 40 32.870 2.3
42.257904 142.378067 37.039 2018 9 30 12 19 45.940 0.6
42.474541 142.065399 23.091 2018 9 30 12 29 6.530 0.4
42.757389 141.900833 15.606 2018 9 30 12 46 52.240 0.8
42.747272 142.013763 30.402 2018 9 30 14 3 54.300 2.5
42.645927 142.027496 28.096 2018 9 30 14 39 48.040 1.7
42.736900 142.002655 28.407 2018 9 30 15 10 41.300 1.1
42.712841 142.024384 26.877 2018 9 30 15 26 8.430 1.0
42.736328 142.023209 36.530 2018 9 30 16 40 49.740 1.0
42.562080 142.039322 30.305 2018 9 30 17 54 4.040 4.9
42.567059 142.024216 29.731 2018 9 30 17 58 13.440 2.9
42.561512 142.026978 29.064 2018 9 30 18 0 7.160 2.6
42.570126 142.020828 29.355 2018 9 30 18 3 13.640 1.8
42.567982 142.031799 28.937 2018 9 30 18 9 48.460 1.4
42.558132 142.035019 29.743 2018 9 30 18 10 50.320 1.3
42.563831 142.031738 29.141 2018 9 30 18 12 2.680 1.0
42.568336 142.030624 29.072 2018 9 30 18 12 41.280 1.4
42.569157 142.025528 29.009 2018 9 30 18 13 42.700 1.2
42.572582 142.029297 29.633 2018 9 30 18 16 34.400 1.6
42.561035 142.038300 29.807 2018 9 30 18 23 14.440 1.0
42.566494 142.031647 28.811 2018 9 30 18 25 9.460 1.3
42.555496 142.041901 28.381 2018 9 30 18 26 38.440 1.3
42.564610 142.028275 29.520 2018 9 30 18 29 46.560 1.2
42.563473 142.021393 29.717 2018 9 30 18 32 3.360 0.9
42.564762 142.027557 29.474 2018 9 30 18 33 8.200 1.8
42.570251 142.026382 28.750 2018 9 30 18 34 0.080 1.3
42.641384 142.023331 26.481 2018 9 30 18 35 16.880 1.2
42.559196 142.035690 28.940 2018 9 30 18 36 49.600 1.2
42.577797 142.019913 29.179 2018 9 30 18 38 19.280 1.0
42.560284 142.030334 29.453 2018 9 30 18 43 36.040 2.5
42.573269 142.032043 29.738 2018 9 30 18 52 12.400 1.5
42.656944 141.934937 14.448 2018 9 30 18 54 4.120 1.5
42.567741 142.030029 29.211 2018 9 30 18 57 26.720 1.4
42.572651 142.028793 29.628 2018 9 30 19 11 31.160 1.4
42.561485 142.035873 29.519 2018 9 30 19 20 24.080 2.9
42.557362 142.032669 28.797 2018 9 30 19 29 23.220 1.3
42.565884 142.032196 29.327 2018 9 30 19 50 49.320 2.1
42.569145 142.017242 28.145 2018 9 30 20 3 37.440 1.6
42.562836 142.036453 29.450 2018 9 30 20 24 19.240 0.9
42.576225 142.018585 30.377 2018 9 30 20 24 30.520 1.0
42.558830 142.034637 28.619 2018 9 30 20 29 28.000 1.3
42.569035 142.025772 29.828 2018 9 30 20 37 46.440 1.6
42.565449 142.034027 28.898 2018 9 30 20 45 23.500 1.1
42.648308 142.016693 27.629 2018 9 30 21 4 48.200 1.4
42.575638 142.023132 29.134 2018 9 30 21 8 0.940 1.4
42.566376 142.034164 29.208 2018 9 30 21 12 38.760 0.9
42.565109 142.034897 28.828 2018 9 30 21 19 49.260 1.3
42.563114 142.026169 29.132 2018 9 30 21 47 43.160 1.2
42.562614 142.033295 29.577 2018 9 30 21 57 31.100 1.3
42.577473 142.030411 29.128 2018 9 30 22 3 22.400 1.3
42.663895 142.032791 30.425 2018 9 30 22 40 39.320 1.0
42.598812 142.000092 30.198 2018 9 30 23 27 1.480 2.7
42.570259 142.034851 29.872 2018 9 30 23 54 35.900 1.0
42.563366 142.030975 30.213 2018 10 1 0 4 15.040 1.2
42.569149 142.028748 29.632 2018 10 1 0 46 52.930 1.2
42.711227 142.000610 29.686 2018 10 1 1 27 34.770 1.2
42.785152 142.031891 26.767 2018 10 1 1 38 9.820 1.5
42.673702 142.010895 28.684 2018 10 1 1 50 42.990 2.8
42.648209 141.933777 16.385 2018 10 1 2 8 55.190 1.7
42.562199 142.039764 29.779 2018 10 1 2 16 54.550 1.6
42.561802 142.038559 28.373 2018 10 1 2 21 31.750 1.0
42.569321 142.026031 29.570 2018 10 1 2 43 8.470 1.7
42.567802 142.035294 29.474 2018 10 1 3 19 4.470 2.7
42.564117 142.039871 29.603 2018 10 1 3 32 42.550 3.0
42.686256 142.009155 28.014 2018 10 1 3 40 31.370 1.7
42.585026 142.027328 34.887 2018 10 1 3 42 5.310 1.2
42.551350 142.035828 30.712 2018 10 1 4 2 41.410 0.0
42.585056 141.979446 26.434 2018 10 1 4 16 23.730 0.9
42.578400 142.022186 28.682 2018 10 1 4 54 19.290 0.9
42.574444 142.030731 29.275 2018 10 1 5 16 32.140 1.2
42.719261 142.000885 34.389 2018 10 1 6 55 54.930 1.5
42.568874 142.034225 28.538 2018 10 1 7 47 39.350 2.6
42.714314 142.001068 23.073 2018 10 1 8 0 49.190 1.2
42.572628 142.029358 29.712 2018 10 1 10 35 9.830 1.7
42.572514 142.031815 28.356 2018 10 1 10 50 54.140 1.8
42.575729 142.042130 28.827 2018 10 1 10 53 48.720 1.6
42.646156 142.016861 26.732 2018 10 1 11 3 52.950 1.3
42.564072 142.024216 29.790 2018 10 1 11 4 52.880 2.2
42.780521 142.024780 29.129 2018 10 1 11 22 2.880 4.7
42.782215 142.030869 28.104 2018 10 1 11 31 31.920 1.7
42.781307 142.026489 28.782 2018 10 1 11 32 45.870 1.8
42.563705 142.029465 29.328 2018 10 1 11 34 1.000 1.2
42.640877 142.016296 28.057 2018 10 1 11 35 46.770 1.6
42.564987 142.017929 29.212 2018 10 1 12 49 34.900 0.8
42.561512 142.031998 30.996 2018 10 1 13 32 2.980 1.3
42.617733 141.984192 23.669 2018 10 1 13 46 8.680 1.6
42.782932 141.937027 15.242 2018 10 1 13 53 57.700 1.2
42.711277 142.028625 26.363 2018 10 1 14 27 6.010 1.3
42.810558 142.034988 30.427 2018 10 1 14 27 38.340 0.7
42.598583 142.002899 29.415 2018 10 1 14 43 1.180 2.4
42.569477 142.031036 28.956 2018 10 1 14 51 37.060 1.4
42.695179 142.003769 25.695 2018 10 1 14 58 3.290 1.0
42.679810 142.016388 26.976 2018 10 1 16 3 13.960 0.9
42.562759 142.036407 29.713 2018 10 1 16 37 9.110 3.2
42.673882 142.013351 30.770 2018 10 1 17 25 52.060 2.7
42.685009 142.015564 27.302 2018 10 1 17 38 13.980 1.1
42.778866 141.865524 16.118 2018 10 1 17 47 36.560 1.7
42.566151 142.030914 29.235 2018 10 1 18 29 7.680 1.0
42.563934 142.032135 29.070 2018 10 1 18 53 6.980 0.0
42.566532 142.038940 28.353 2018 10 1 19 51 1.700 1.8
42.674397 142.009613 28.592 2018 10 1 20 5 32.160 1.4
42.558605 142.037827 29.419 2018 10 1 20 18 28.760 1.1
42.610027 141.985565 25.876 2018 10 1 21 39 14.860 1.5
42.595150 142.023163 33.876 2018 10 1 22 35 16.440 1.3
42.780373 142.026062 27.469 2018 10 1 23 15 30.280 1.6
42.560829 142.024002 32.135 2018 10 1 23 15 50.780 1.2
42.806561 142.031097 28.453 2018 10 1 23 21 39.080 3.2
42.565697 142.039978 29.881 2018 10 1 23 28 0.560 2.2
42.655922 142.026016 32.184 2018 10 2 0 22 10.740 1.4
42.560120 142.033051 28.919 2018 10 2 0 52 39.190 1.5
42.688766 142.004517 25.079 2018 10 2 1 45 47.650 1.0
42.572128 142.035110 28.857 2018 10 2 1 50 19.000 2.0
42.568241 142.030807 29.413 2018 10 2 2 24 14.320 1.2
42.573910 142.032959 29.059 2018 10 2 3 26 1.120 1.4
42.763733 141.911606 12.116 2018 10 2 3 36 36.620 0.0
42.679512 142.009094 28.130 2018 10 2 3 40 49.780 1.5
42.654552 141.947647 13.801 2018 10 2 4 45 55.880 0.0
42.580452 142.031509 30.651 2018 10 2 5 2 59.170 2.9
42.570400 142.030457 29.409 2018 10 2 5 41 50.180 1.7
42.747749 141.954254 17.773 2018 10 2 7 47 20.720 1.5
42.564713 142.033081 30.119 2018 10 2 8 1 35.600 1.4
42.618111 142.159988 8.844 2018 10 2 8 50 59.290 0.0
42.554981 142.024612 31.572 2018 10 2 10 23 46.300 1.2
42.567348 142.027786 29.879 2018 10 2 12 5 22.440 1.2
42.693756 142.027786 27.561 2018 10 2 12 33 40.430 1.6
42.566666 142.036942 28.510 2018 10 2 12 44 34.850 1.4
42.715614 142.009384 27.291 2018 10 2 13 15 13.340 1.7
42.559399 142.032043 27.746 2018 10 2 14 36 52.130 2.1
42.593319 141.982895 26.544 2018 10 2 15 25 44.010 1.3
42.647182 142.020309 28.491 2018 10 2 15 40 37.280 1.0
42.726131 142.004715 25.348 2018 10 2 15 50 0.830 1.2
42.699833 141.990158 29.985 2018 10 2 16 3 57.170 0.0
42.567593 142.019806 30.660 2018 10 2 16 53 11.990 0.9
42.655712 142.023209 31.561 2018 10 2 17 5 44.620 0.8
42.337437 142.407990 15.868 2018 10 2 19 8 33.120 0.7
42.581787 142.026138 28.751 2018 10 2 19 22 58.800 0.7
42.614239 142.007660 28.677 2018 10 2 20 42 56.680 1.0
42.559971 142.032837 29.589 2018 10 2 21 2 0.180 1.0
42.568199 142.021759 29.904 2018 10 2 21 16 53.440 1.6
42.678627 142.016068 25.293 2018 10 2 21 20 11.620 0.7
42.664364 141.993210 22.949 2018 10 2 22 1 41.000 1.0
42.568760 142.035049 28.552 2018 10 2 22 3 45.760 1.2
42.572315 142.029663 29.113 2018 10 2 23 32 52.480 1.3
42.673256 141.958893 19.525 2018 10 3 1 3 28.640 0.9
42.615776 141.988098 22.566 2018 10 3 1 4 15.870 1.4
42.691017 142.154083 10.638 2018 10 3 4 12 46.450 0.3
42.667564 141.989334 23.888 2018 10 3 4 40 26.640 1.6
42.665405 142.030090 28.965 2018 10 3 5 18 8.600 0.7
42.667740 141.993958 23.964 2018 10 3 8 22 46.230 0.5
42.565300 142.028061 29.726 2018 10 3 8 59 20.900 1.2
42.668613 142.000168 25.801 2018 10 3 9 41 1.500 1.5
42.613117 141.999023 29.337 2018 10 3 9 47 59.890 0.8
42.548763 142.045502 25.419 2018 10 3 9 50 0.660 0.0
42.569866 142.024323 29.321 2018 10 3 10 7 8.140 1.3
42.732933 142.017853 27.172 2018 10 3 10 21 25.560 1.3
42.651718 142.029800 30.096 2018 10 3 11 6 36.270 2.2
42.609653 142.125366 14.968 2018 10 3 12 9 56.860 0.6
42.778545 142.003738 25.615 2018 10 3 14 11 55.780 0.7
42.564899 142.027679 29.940 2018 10 3 14 23 34.030 2.9
42.563221 142.032852 28.363 2018 10 3 14 26 37.170 1.4
42.669556 142.013855 28.250 2018 10 3 18 11 45.860 2.7
42.672569 141.990463 23.275 2018 10 3 19 29 5.380 0.5
42.584431 141.986786 25.340 2018 10 3 19 32 23.840 1.5
42.615444 142.078796 18.050 2018 10 3 19 41 26.420 1.0
42.693981 142.001068 27.413 2018 10 3 19 56 48.500 1.2
42.570576 142.026306 27.791 2018 10 3 20 11 49.560 0.9
42.644783 142.019974 31.044 2018 10 3 20 26 25.060 2.5
42.657166 142.016602 28.131 2018 10 3 21 3 57.800 3.0
42.683926 141.986786 30.123 2018 10 3 21 7 53.960 1.0
42.587696 141.992523 28.921 2018 10 3 21 17 5.200 1.0
42.832684 141.903900 10.383 2018 10 3 22 44 30.040 0.6
42.571995 142.033386 27.945 2018 10 3 22 46 49.400 1.0
42.568607 142.028580 28.873 2018 10 3 22 54 14.080 0.8
42.567833 142.041595 28.277 2018 10 3 22 58 39.360 0.6
42.664852 142.029877 31.333 2018 10 4 0 38 31.560 0.9
42.786732 142.025375 27.551 2018 10 4 0 39 40.680 0.6
42.804577 142.008682 27.032 2018 10 4 0 44 14.880 1.0
42.657387 142.010788 26.805 2018 10 4 0 46 24.350 1.2
42.523975 142.012741 26.233 2018 10 4 0 51 16.150 1.0
42.568714 142.001389 32.005 2018 10 4 1 2 21.510 0.0
42.613686 142.012482 29.098 2018 10 4 1 30 6.000 1.0
42.585136 142.020004 30.037 2018 10 4 1 31 16.260 1.8
42.565376 142.031525 28.995 2018 10 4 2 32 52.600 1.5
42.582108 142.006729 27.227 2018 10 4 3 0 38.410 0.9
42.665417 142.008942 26.691 2018 10 4 3 38 11.550 1.7
42.571308 142.026245 30.632 2018 10 4 3 51 4.780 2.1
42.655697 142.019867 24.628 2018 10 4 5 20 12.850 1.5
42.683891 141.988480 34.421 2018 10 4 9 23 2.900 0.3
42.090263 142.259247 44.455 2018 10 4 10 42 30.140 1.5
42.741562 142.029419 29.950 2018 10 4 12 21 41.450 0.8
42.589149 142.032440 30.120 2018 10 4 13 21 47.590 0.8
42.821316 141.987411 35.099 2018 10 4 14 51 54.830 0.4
42.560787 142.044952 29.363 2018 10 4 16 23 53.450 0.5
42.660728 142.018677 29.246 2018 10 4 16 46 30.770 1.4
42.800911 142.014282 26.193 2018 10 4 18 22 50.440 0.9
42.552979 142.013397 33.547 2018 10 4 20 7 37.120 0.6
42.655960 142.017242 32.220 2018 10 4 21 27 6.120 1.6
42.560978 141.988480 13.386 2018 10 4 22 3 25.120 0.9
42.680378 141.859299 14.899 2018 10 5 0 45 44.650 0.4
42.661034 141.997757 35.893 2018 10 5 1 24 42.140 0.0
42.690002 141.871552 13.636 2018 10 5 1 28 34.440 0.5
42.621548 141.995224 23.339 2018 10 5 1 29 9.350 0.9
42.567612 142.028976 28.546 2018 10 5 2 4 54.140 1.2
42.613403 141.988312 26.198 2018 10 5 2 9 32.930 1.6
42.577473 142.028488 29.567 2018 10 5 3 9 58.090 1.1
42.711823 141.964508 23.282 2018 10 5 4 37 11.690 0.9
42.563354 142.038040 29.475 2018 10 5 5 10 14.870 1.1
42.677525 141.994873 25.488 2018 10 5 5 24 41.480 1.9
42.594196 142.013580 26.209 2018 10 5 8 58 48.550 5.2
42.605484 142.073578 18.709 2018 10 5 9 4 25.670 1.6
42.595425 142.010574 25.175 2018 10 5 9 8 45.690 1.3
42.666859 141.977402 27.279 2018 10 5 9 9 56.740 1.0
42.614784 142.026917 24.379 2018 10 5 9 23 29.820 0.7
42.582153 142.073853 21.206 2018 10 5 9 31 38.940 0.9
42.609676 142.024933 24.497 2018 10 5 9 34 6.730 1.0
42.710381 142.004395 25.494 2018 10 5 10 21 53.950 1.0
42.677055 141.880920 12.910 2018 10 5 11 45 40.410 2.2
42.668705 141.894730 13.095 2018 10 5 11 55 15.110 0.0
42.618931 142.028778 25.633 2018 10 5 11 55 17.310 2.4
42.685215 141.891785 9.491 2018 10 5 12 32 36.800 0.6
42.673286 141.877457 12.371 2018 10 5 12 59 25.980 1.3
42.704304 142.106369 18.666 2018 10 5 13 40 20.000 0.8
42.661903 142.096725 11.749 2018 10 5 13 57 11.440 2.7
42.636406 142.008926 34.835 2018 10 5 16 44 46.820 1.0
42.706951 142.100525 18.970 2018 10 5 17 11 39.260 0.2
42.679173 142.017502 35.199 2018 10 5 17 20 12.640 0.1
42.587509 142.036011 20.955 2018 10 5 18 40 4.000 0.5
42.684605 141.866043 10.760 2018 10 5 19 25 37.680 0.8
42.647411 142.099091 14.232 2018 10 5 19 58 57.960 0.2
42.670879 141.923965 7.932 2018 10 5 20 10 45.040 1.0
42.564198 142.033661 29.336 2018 10 5 20 54 9.700 1.8
42.610241 142.009933 25.044 2018 10 5 21 46 2.920 1.1
42.642033 142.019165 29.535 2018 10 5 23 37 11.840 0.7
42.692028 142.083862 17.528 2018 10 5 23 40 59.920 0.5
42.703041 142.109421 15.588 2018 10 5 23 43 27.960 0.5
42.626804 141.992661 24.812 2018 10 5 23 54 1.200 2.7
42.565685 141.966980 15.442 2018 10 6 0 0 22.650 0.9
42.574730 142.039429 29.011 2018 10 6 1 53 32.650 0.7
42.808655 142.030746 30.375 2018 10 6 2 11 4.680 0.6
42.736126 142.029587 32.607 2018 10 6 3 4 9.990 0.5
42.612816 142.032028 25.084 2018 10 6 3 10 40.180 0.6
42.556374 142.039459 28.704 2018 10 6 4 10 51.570 0.9
42.720818 141.972351 12.626 2018 10 6 4 29 39.570 0.7
42.566208 142.032730 29.036 2018 10 6 4 50 2.380 0.8
42.589821 141.982971 27.457 2018 10 6 9 8 1.720 1.2
42.795731 142.016403 28.590 2018 10 6 9 52 24.010 2.4
42.683701 142.006027 28.972 2018 10 6 10 10 49.870 1.7
42.608730 141.998764 23.111 2018 10 6 10 35 54.750 0.6
42.671997 142.017517 30.080 2018 10 6 13 14 23.240 4.1
42.675247 142.013977 27.704 2018 10 6 13 22 29.850 1.4
42.694630 142.030151 26.133 2018 10 6 13 36 52.870 1.0
42.673576 141.999664 25.329 2018 10 6 13 49 16.950 0.7
42.668064 142.014328 27.347 2018 10 6 13 55 43.310 0.9
42.666359 142.007690 24.904 2018 10 6 14 1 46.080 1.1
42.669174 142.010773 29.000 2018 10 6 17 3 49.480 0.9
42.619747 141.984833 22.194 2018 10 6 18 48 56.360 0.5
42.590992 141.979065 23.809 2018 10 6 20 13 5.000 1.1
42.569038 142.036285 28.251 2018 10 6 20 59 45.920 0.7
42.683811 141.867264 11.112 2018 10 6 21 8 11.320 0.9
42.659611 141.911057 16.488 2018 10 6 21 29 25.600 1.0
42.682140 141.869812 13.987 2018 10 6 21 41 17.340 1.9
42.674789 141.854752 11.096 2018 10 6 21 45 23.400 0.6
42.683392 141.862518 10.461 2018 10 6 21 45 30.960 1.2
42.672832 142.016098 29.111 2018 10 6 22 2 54.980 1.4
42.687981 141.873138 11.992 2018 10 6 22 7 43.740 1.4
42.652870 142.017624 27.133 2018 10 6 22 41 55.720 0.7
42.693436 141.858337 9.415 2018 10 6 23 4 12.380 1.3
42.688095 141.871857 11.271 2018 10 6 23 9 15.700 1.4
42.682163 141.860428 10.857 2018 10 6 23 11 10.240 1.2
42.681267 141.869629 10.939 2018 10 6 23 11 22.760 1.5
42.591000 142.033020 31.651 2018 10 6 23 12 29.120 3.9
42.677986 141.865845 11.133 2018 10 6 23 26 7.080 0.7
42.787956 141.908936 21.954 2018 10 6 23 58 45.880 1.1
42.648579 141.862411 12.810 2018 10 7 0 16 48.050 0.8
42.666840 141.851852 13.758 2018 10 7 0 29 57.060 1.6
42.597443 141.993042 28.490 2018 10 7 0 31 51.870 0.5
42.682915 141.860245 10.716 2018 10 7 2 22 16.310 1.2
42.673904 141.858459 12.911 2018 10 7 2 29 46.740 1.4
42.674473 142.012283 28.039 2018 10 7 3 15 4.550 1.4
42.681168 141.867416 13.228 2018 10 7 3 32 31.530 2.3
42.673626 141.859039 10.692 2018 10 7 3 37 36.510 0.7
42.729645 142.025757 29.233 2018 10 7 3 55 50.020 2.7
42.696831 142.023132 27.722 2018 10 7 4 53 56.560 1.4
42.696022 142.005447 27.484 2018 10 7 5 3 17.810 1.5
42.570759 141.984039 25.401 2018 10 7 5 20 38.900 2.4
42.674259 142.011200 26.996 2018 10 7 7 5 6.110 1.0
42.683567 141.866302 10.607 2018 10 7 7 35 19.100 1.5
42.692268 141.865250 12.277 2018 10 7 7 50 43.290 1.2
42.685627 141.854736 10.045 2018 10 7 8 7 16.110 1.4
42.752243 141.935822 14.324 2018 10 7 8 33 54.900 0.7
42.685360 141.869675 10.540 2018 10 7 9 18 6.250 1.4
42.679764 141.829407 8.407 2018 10 7 9 43 59.810 0.8
42.615547 142.009491 29.490 2018 10 7 10 35 1.790 1.4
42.681553 141.851456 10.791 2018 10 7 10 40 45.270 1.5
42.678696 141.871216 12.585 2018 10 7 10 57 55.520 1.6
42.754421 142.016937 28.702 2018 10 7 11 13 44.440 1.4
42.671692 141.994125 24.641 2018 10 7 11 58 30.820 1.6
42.678299 141.993179 25.358 2018 10 7 12 19 56.280 1.4
42.699547 142.132324 9.151 2018 10 7 14 40 39.480 0.4
42.679783 141.920715 15.848 2018 10 7 15 27 20.610 1.6
42.789028 142.041809 26.557 2018 10 7 15 51 25.550 2.1
42.683109 142.009888 27.714 2018 10 7 18 42 54.000 1.4
42.668423 141.921509 8.117 2018 10 7 21 8 20.440 0.9
42.567574 142.024490 28.994 2018 10 7 22 52 57.320 2.9
42.597847 141.966339 23.019 2018 10 8 0 35 40.160 1.4
42.645908 142.019257 31.857 2018 10 8 0 55 10.780 1.2
42.610619 141.996292 26.091 2018 10 8 1 17 35.370 0.0
42.563225 142.034409 27.981 2018 10 8 1 32 57.970 1.4
42.705406 142.152908 11.700 2018 10 8 1 56 1.490 0.6
42.680660 141.907440 12.737 2018 10 8 2 8 10.700 1.5
42.677700 141.870209 12.869 2018 10 8 2 10 47.480 1.7
42.756855 141.912155 11.307 2018 10 8 2 32 28.830 1.8
42.755081 141.919128 11.781 2018 10 8 2 36 30.760 1.3
42.610107 141.984573 26.074 2018 10 8 2 47 22.190 1.6
42.699753 142.028748 30.141 2018 10 8 3 25 21.430 1.9
42.631973 142.012360 31.369 2018 10 8 3 28 27.320 0.0
42.761028 141.926727 10.906 2018 10 8 3 36 41.040 0.6
42.725056 142.007080 26.972 2018 10 8 5 13 1.520 1.4
42.563591 142.019073 29.374 2018 10 8 5 39 37.080 0.6
42.617664 142.018997 24.520 2018 10 8 6 6 32.490 1.4
42.676670 141.881256 11.557 2018 10 8 6 45 13.810 1.4
42.588337 142.033997 29.307 2018 10 8 7 6 2.850 1.2
42.604980 142.006531 25.293 2018 10 8 7 15 39.150 1.0
42.600719 141.867661 10.295 2018 10 8 7 26 20.060 0.9
42.645988 141.965881 23.131 2018 10 8 12 44 2.390 1.0
42.643787 141.941559 21.785 2018 10 8 13 44 3.490 1.4
42.691704 142.006424 27.669 2018 10 8 15 7 33.260 1.1
42.623074 141.988480 27.617 2018 10 8 15 24 33.460 1.0
42.046108 142.527557 41.258 2018 10 8 15 28 37.620 0.9
42.677738 142.003494 30.583 2018 10 8 17 5 43.220 0.5
42.592579 141.986786 26.355 2018 10 8 17 13 39.140 1.4
42.571644 142.021454 29.138 2018 10 8 18 8 27.800 1.1
42.570126 141.996292 19.467 2018 10 8 19 42 1.240 0.9
42.784443 141.939789 16.487 2018 10 8 21 0 24.680 0.9
42.783806 141.945618 17.263 2018 10 8 21 9 57.340 1.1
42.759415 141.914062 11.878 2018 10 8 21 28 27.000 0.6
42.623562 142.008118 28.062 2018 10 8 21 53 58.080 4.3
42.624973 141.998993 26.234 2018 10 8 21 56 13.400 2.4
42.677696 142.016266 27.034 2018 10 8 22 39 16.480 0.7
42.631313 142.008636 26.838 2018 10 9 0 46 55.640 1.0
42.564682 142.036179 28.241 2018 10 9 1 26 30.510 0.8
42.600166 142.009201 30.642 2018 10 9 2 21 24.060 0.4
42.664642 142.015213 28.112 2018 10 9 2 28 51.040 0.6
42.620861 142.000381 28.144 2018 10 9 2 45 15.300 4.3
42.620224 141.998825 26.385 2018 10 9 3 17 20.900 1.2
42.701344 142.003098 25.964 2018 10 9 3 25 38.980 0.8
42.671482 141.916397 12.858 2018 10 9 4 0 57.600 1.3
42.612152 142.022385 25.752 2018 10 9 4 44 55.400 0.7
42.592182 142.001282 27.055 2018 10 9 6 17 5.080 0.8
42.712719 142.005463 27.120 2018 10 9 6 45 15.930 1.0
42.594868 142.036011 29.798 2018 10 9 7 41 1.280 1.1
42.592617 141.985519 28.904 2018 10 9 8 41 57.890 2.8
42.596405 141.988846 28.272 2018 10 9 8 49 53.390 1.1
42.564896 142.034027 29.074 2018 10 9 8 51 58.700 1.5
42.625069 141.994339 28.504 2018 10 9 9 21 27.990 3.1
42.713665 142.000198 28.832 2018 10 9 9 43 35.980 2.2
42.604393 141.984970 26.195 2018 10 9 9 48 28.670 1.6
42.626995 141.993240 27.931 2018 10 9 9 51 46.450 2.2
42.734577 141.995605 28.905 2018 10 9 11 19 6.810 0.5
42.589859 141.980194 27.151 2018 10 9 14 12 16.350 1.1
42.583366 142.015610 26.447 2018 10 9 15 38 5.840 1.3
42.606377 141.987396 28.742 2018 10 9 16 52 27.730 1.7
42.564358 142.033997 29.280 2018 10 9 17 50 11.320 1.5
42.661022 142.027298 26.614 2018 10 9 18 33 11.280 1.2
42.608612 142.002380 29.403 2018 10 9 18 37 42.760 2.5
42.603569 142.006836 29.341 2018 10 9 19 36 36.960 0.5
42.598915 142.014389 25.514 2018 10 9 20 56 5.720 1.9
42.596130 141.987091 30.401 2018 10 10 0 17 55.270 0.7
42.689323 142.008743 29.090 2018 10 10 1 0 52.460 2.2
42.569214 142.033310 30.489 2018 10 10 4 6 12.130 0.9
42.717556 142.005447 26.081 2018 10 10 6 52 4.400 0.9
42.597340 141.989822 28.769 2018 10 10 7 30 18.270 1.4
42.551556 141.972351 15.209 2018 10 10 7 35 27.910 1.1
42.612457 142.044373 31.119 2018 10 10 9 15 40.950 2.0
42.785290 142.028442 25.179 2018 10 10 9 26 2.260 0.5
41.944542 142.455978 51.799 2018 10 10 9 41 29.610 0.5
42.688858 142.010010 27.683 2018 10 10 9 49 46.020 1.3
42.684010 141.984619 27.114 2018 10 10 11 34 43.330 0.6
42.583717 142.016708 29.115 2018 10 10 13 11 37.970 0.9
42.679817 141.999222 27.765 2018 10 10 13 36 6.890 1.0
42.637424 141.924728 15.195 2018 10 10 15 29 55.130 1.3
42.631805 142.019745 24.640 2018 10 10 16 37 43.570 0.9
42.799709 142.028839 27.001 2018 10 10 17 36 41.200 1.1
42.675087 142.008667 28.370 2018 10 10 17 57 4.040 3.5
42.676159 141.981964 22.642 2018 10 10 17 58 54.700 1.0
42.631447 142.028336 34.667 2018 10 10 18 44 52.080 1.2
42.614929 142.025589 30.802 2018 10 10 18 57 20.100 1.5
42.604195 141.995026 28.127 2018 10 10 19 37 39.040 1.2
42.726776 142.002655 27.462 2018 10 10 21 42 3.880 0.8
42.669609 142.006577 26.975 2018 10 10 22 40 6.760 3.1
42.564861 142.034775 29.998 2018 10 10 23 2 13.060 1.4
42.614952 142.009888 25.183 2018 10 11 0 29 11.060 0.9
42.595947 142.114716 11.617 2018 10 11 3 17 20.720 1.4
42.671551 142.026215 27.191 2018 10 11 4 39 2.030 1.3
42.697567 142.018814 27.932 2018 10 11 4 43 40.420 1.6
42.599354 141.988693 26.517 2018 10 11 4 56 25.710 0.9
42.626297 142.025253 33.695 2018 10 11 12 53 38.550 1.3
42.687462 142.012375 28.423 2018 10 11 15 8 5.890 1.5
42.555672 141.960297 17.853 2018 10 11 16 12 32.850 0.6
42.671299 142.009705 27.395 2018 10 11 19 33 55.800 0.9
42.614407 142.005295 29.390 2018 10 11 19 48 36.760 0.8
42.615387 142.013672 29.891 2018 10 11 20 7 28.680 1.4
42.659184 142.028427 34.644 2018 10 11 22 46 26.280 2.4
42.634922 141.999924 24.927 2018 10 11 22 54 45.960 0.8
42.586037 141.859650 26.298 2018 10 11 23 48 41.460 1.2
42.800377 142.026077 28.437 2018 10 12 0 44 26.400 1.7
42.693089 142.102570 8.946 2018 10 12 1 24 39.760 0.4
42.634403 141.917511 15.804 2018 10 12 2 26 50.140 1.0
42.517761 141.880875 11.767 2018 10 12 2 31 4.860 1.1
42.594162 141.974777 25.299 2018 10 12 3 5 7.560 1.0
42.543690 142.026428 35.796 2018 10 12 3 48 25.150 0.8
42.589722 142.017822 29.586 2018 10 12 5 31 10.820 0.7
42.674274 142.039032 30.223 2018 10 12 6 53 41.220 0.8
42.559032 142.032959 28.440 2018 10 12 8 2 46.230 1.4
42.584217 141.993576 22.669 2018 10 12 9 14 26.820 4.6
42.591343 142.004440 28.933 2018 10 12 10 6 23.070 1.5
42.723801 142.003098 28.925 2018 10 12 10 42 43.460 3.1
42.659550 142.162903 9.479 2018 10 12 12 4 1.930 1.4
42.583668 141.973099 26.574 2018 10 12 13 43 11.140 0.9
42.701183 142.016022 27.103 2018 10 12 15 19 28.440 1.0
42.558922 142.031464 28.917 2018 10 12 20 39 3.600 1.3
42.798397 142.018127 27.468 2018 10 12 21 8 53.600 1.3
42.605698 141.986313 26.306 2018 10 12 21 48 31.560 1.4
42.633213 142.020447 29.945 2018 10 12 23 58 38.640 1.2
42.674732 142.015625 28.757 2018 10 13 0 46 47.360 0.9
42.624588 142.002411 25.607 2018 10 13 1 0 41.290 3.7
42.710560 142.004868 26.917 2018 10 13 6 8 27.130 1.4
42.691437 142.006866 28.311 2018 10 13 7 13 20.090 2.0
42.720726 142.029602 27.669 2018 10 13 7 17 7.200 1.2
42.657318 141.929764 14.496 2018 10 13 10 43 57.730 0.4
42.693737 142.002396 25.881 2018 10 13 11 0 24.040 1.2
42.622849 142.024628 30.547 2018 10 13 15 42 45.310 2.1
42.571068 142.002655 19.473 2018 10 13 20 56 27.120 0.3
42.622013 141.972397 28.576 2018 10 13 22 24 7.560 0.6
42.696602 141.994766 31.632 2018 10 13 22 33 24.040 0.7
42.668159 142.015564 28.360 2018 10 13 23 51 57.840 0.4
42.721664 142.000015 27.453 2018 10 13 23 53 42.780 0.2
42.767498 142.005386 29.294 2018 10 14 0 27 10.760 1.3
42.743782 142.011871 25.932 2018 10 14 0 56 48.000 0.4
42.760303 141.948837 14.974 2018 10 14 1 9 45.690 0.3
42.602501 142.002167 29.530 2018 10 14 2 23 17.940 2.2
42.519585 142.056351 13.014 2018 10 14 3 0 46.460 1.3
42.382618 142.009872 9.660 2018 10 14 3 8 53.990 1.1
42.607670 141.987610 24.624 2018 10 14 4 47 4.240 2.4
42.730625 141.927841 13.702 2018 10 14 5 55 19.440 1.2
42.651226 142.066666 17.079 2018 10 14 5 57 2.790 0.9
42.689987 141.998978 28.471 2018 10 14 6 10 20.860 0.5
42.689770 142.053207 14.157 2018 10 14 7 36 26.400 0.8
42.743706 141.936752 27.739 2018 10 14 7 53 55.550 1.3
42.773720 142.019348 29.625 2018 10 14 8 22 11.600 0.8
42.586823 141.796600 8.937 2018 10 14 10 48 30.640 1.2
42.658085 142.035706 30.879 2018 10 14 11 46 31.020 1.6
42.652725 141.912720 16.333 2018 10 14 12 37 12.340 1.2
42.700733 142.009445 26.184 2018 10 14 13 4 0.180 1.0
42.713879 142.007294 29.018 2018 10 14 14 53 56.430 1.1
42.592907 141.995163 30.018 2018 10 14 16 17 48.640 0.8
42.621735 142.029526 32.116 2018 10 14 17 42 47.240 1.1
42.781128 142.006531 30.296 2018 10 14 18 47 54.160 0.6
42.682354 142.001129 27.308 2018 10 14 20 13 8.520 1.2
42.617107 141.996918 27.231 2018 10 14 21 7 17.460 3.0
42.568649 142.032501 30.271 2018 10 15 1 35 10.870 1.0
42.594296 142.001526 29.592 2018 10 15 2 41 21.240 1.6
42.833546 141.923813 11.233 2018 10 15 3 27 4.020 1.4
42.601795 142.146667 22.837 2018 10 15 4 17 48.000 1.1
42.628529 142.133560 13.880 2018 10 15 5 16 59.390 0.3
42.746487 142.018356 29.853 2018 10 15 9 16 49.010 2.0
42.423805 141.970001 11.407 2018 10 15 9 33 25.620 1.5
42.564224 142.045044 29.251 2018 10 15 12 20 33.700 2.7
42.581120 141.982285 24.512 2018 10 15 14 12 39.980 1.4
42.637909 142.027649 32.471 2018 10 15 15 11 7.020 1.5
42.624149 141.979599 26.226 2018 10 15 19 56 19.080 0.7
42.743958 142.021805 27.240 2018 10 15 20 55 11.000 0.7
42.722004 142.001770 26.802 2018 10 15 21 48 53.820 1.4
42.711567 141.997086 29.339 2018 10 16 1 26 52.700 1.2
42.635178 142.033707 34.486 2018 10 16 5 4 31.960 1.5
42.677814 142.015182 24.197 2018 10 16 5 49 56.030 0.7
42.696960 142.000092 34.420 2018 10 16 8 32 23.210 0.4
42.558510 142.033142 29.635 2018 10 16 13 36 1.010 2.4
42.699844 142.014999 26.320 2018 10 16 13 53 1.370 0.3
42.598721 141.959915 29.726 2018 10 16 16 33 19.490 1.3
42.745506 141.988327 16.827 2018 10 16 16 36 23.030 1.0
42.618889 141.779449 7.349 2018 10 16 19 12 13.360 0.6
42.754005 142.017136 27.135 2018 10 16 19 55 55.440 0.7
42.541416 142.087402 14.211 2018 10 16 20 42 58.600 1.1
42.532440 142.084991 14.808 2018 10 16 20 46 37.280 1.1
42.563908 142.016022 30.101 2018 10 16 21 37 59.100 2.7
42.542656 142.004562 27.456 2018 10 16 22 10 59.280 1.2
42.628403 142.000931 25.939 2018 10 17 0 38 45.150 1.4
42.560467 142.018829 29.243 2018 10 17 2 11 9.720 1.0
42.567009 142.036865 28.611 2018 10 17 6 29 59.560 1.0
42.680668 142.013260 32.421 2018 10 17 6 36 30.800 0.8
42.620644 142.006577 28.911 2018 10 17 6 47 50.970 0.5
42.679424 142.012115 27.107 2018 10 17 8 46 39.760 0.8
42.594608 141.987823 26.974 2018 10 17 9 54 34.490 2.5
42.575184 142.190781 22.651 2018 10 17 11 43 42.170 0.2
42.571953 142.025757 31.056 2018 10 17 12 14 41.980 0.8
42.659107 142.023392 30.064 2018 10 17 13 9 25.660 1.1
42.714035 141.958511 28.402 2018 10 17 14 17 11.480 1.0
42.557575 142.213394 17.138 2018 10 17 20 3 47.800 0.0
42.263481 142.393524 47.480 2018 10 17 20 47 10.340 2.3
42.568089 142.030823 29.460 2018 10 18 1 36 1.030 0.2
42.684288 142.006210 30.173 2018 10 18 3 13 49.120 0.5
42.635674 142.023651 30.103 2018 10 18 3 40 42.480 0.8
42.648048 142.003571 34.575 2018 10 18 5 21 22.290 0.9
42.659496 142.024612 31.439 2018 10 18 8 57 33.760 2.3
42.604321 141.994598 28.471 2018 10 18 9 41 1.580 0.6
42.691395 142.006622 26.487 2018 10 18 12 58 36.300 0.8
42.726845 142.285812 10.612 2018 10 18 13 12 26.420 0.3
42.802971 141.975418 25.662 2018 10 18 18 4 14.880 1.1
42.628201 142.025711 32.285 2018 10 18 19 1 57.560 1.3
42.673058 142.013519 27.154 2018 10 18 20 28 7.920 0.9
42.814442 142.011856 29.014 2018 10 18 21 12 31.220 4.1
42.682224 141.998734 35.539 2018 10 18 22 48 28.420 0.0
42.630299 142.027435 31.013 2018 10 18 23 15 48.260 0.9
42.535053 141.966583 17.688 2018 10 19 3 53 26.440 1.1
42.731960 142.001205 28.864 2018 10 19 5 58 43.080 0.8
42.576862 142.171173 13.718 2018 10 19 9 13 14.020 1.1
42.571602 142.106750 14.235 2018 10 19 9 51 33.840 0.8
42.705120 142.000870 25.714 2018 10 19 10 0 31.690 1.2
42.668499 141.914978 18.756 2018 10 19 11 9 24.240 1.2
42.660206 141.923615 17.481 2018 10 19 11 17 40.020 1.0
42.659355 141.865387 23.233 2018 10 19 11 53 25.980 0.0
42.616001 142.015442 28.233 2018 10 19 15 45 12.570 0.4
42.651237 142.013000 27.663 2018 10 19 21 1 3.520 0.3
42.660686 142.024872 26.251 2018 10 19 21 28 28.140 1.0
42.716660 141.986572 32.097 2018 10 19 21 39 32.660 1.2
42.809776 142.013428 26.892 2018 10 19 22 1 41.540 0.4
42.599640 141.981613 26.901 2018 10 19 22 25 32.800 2.5
42.756065 141.913330 11.589 2018 10 19 22 52 21.260 0.9
42.553455 142.014572 34.712 2018 10 19 23 33 59.360 0.4
42.574913 142.034378 28.248 2018 10 19 23 43 37.060 0.9
42.615471 142.028244 24.707 2018 10 20 0 14 44.170 1.5
42.657730 142.016113 25.708 2018 10 20 0 33 2.970 0.7
42.456203 142.393265 36.076 2018 10 20 0 34 49.780 0.4
42.673100 142.007507 30.714 2018 10 20 1 12 35.770 1.0
42.595776 141.991180 28.630 2018 10 20 1 59 44.650 0.9
42.724903 142.021484 31.220 2018 10 20 3 36 1.520 0.3
42.684135 142.024612 29.445 2018 10 20 3 59 42.150 0.6
42.521564 141.984863 17.450 2018 10 20 4 1 47.700 1.1
42.566055 142.034592 29.168 2018 10 20 5 21 58.740 1.9
42.628784 142.018478 29.591 2018 10 20 5 44 30.410 0.4
42.656040 142.029587 31.828 2018 10 20 5 45 32.040 1.3
42.481483 141.944000 16.449 2018 10 20 6 44 12.690 1.2
42.706696 142.009735 29.391 2018 10 20 7 43 10.470 3.3
42.681942 142.010666 26.161 2018 10 20 8 18 7.950 1.3
42.563618 142.073135 16.670 2018 10 20 15 30 48.210 0.8
42.647495 142.004196 23.607 2018 10 20 16 2 4.750 1.4
42.606285 141.994568 32.217 2018 10 20 16 2 35.530 0.5
42.601696 141.995682 31.054 2018 10 20 16 27 6.820 2.1
42.686802 141.992065 32.498 2018 10 20 16 51 1.340 0.2
42.672592 141.994507 26.411 2018 10 20 19 21 54.300 2.0
42.635475 141.991974 23.468 2018 10 20 19 46 9.180 1.0
42.702526 142.009094 26.979 2018 10 20 21 26 6.720 1.0
42.798870 142.004715 28.122 2018 10 20 22 14 6.160 0.4
42.681721 142.023758 30.719 2018 10 20 23 4 45.080 1.0
42.681137 141.989532 26.459 2018 10 20 23 28 55.680 0.8
42.553028 142.023727 31.847 2018 10 21 1 38 23.770 0.6
42.750786 142.016464 27.303 2018 10 21 1 46 43.900 0.3
42.662212 142.050095 35.319 2018 10 21 2 14 24.930 0.3
42.642616 142.029327 32.787 2018 10 21 2 52 46.260 1.0
42.675911 142.055313 14.953 2018 10 21 4 4 12.270 1.5
42.681332 142.051987 13.398 2018 10 21 4 7 46.020 0.4
42.715549 142.011963 29.075 2018 10 21 5 53 41.220 2.0
42.594795 142.009567 25.901 2018 10 21 6 55 35.900 2.3
42.576271 142.114929 12.533 2018 10 21 7 25 18.340 2.0
42.570652 141.965637 36.246 2018 10 21 11 23 30.930 0.1
42.675797 142.001923 26.039 2018 10 21 12 27 50.260 0.6
42.709385 142.010056 29.515 2018 10 21 15 45 20.310 2.5
42.685410 141.998520 31.680 2018 10 21 16 52 42.710 0.0
42.601143 141.978439 26.182 2018 10 21 18 54 11.180 1.3
42.694725 142.000824 26.793 2018 10 21 22 21 56.840 1.2
42.633636 142.022186 32.800 2018 10 22 1 13 21.650 1.0
42.723850 141.989822 28.987 2018 10 22 1 49 27.140 1.4
42.728600 141.893860 13.315 2018 10 22 2 7 7.860 0.4
42.577797 142.015030 23.345 2018 10 22 2 51 36.060 0.9
42.772934 142.014435 26.492 2018 10 22 3 29 8.960 0.7
42.717354 142.008698 30.378 2018 10 22 5 13 28.970 1.9
42.545570 142.144012 11.671 2018 10 22 5 40 19.690 0.3
42.674858 141.977524 38.219 2018 10 22 7 15 11.450 0.0
42.773907 141.986298 33.413 2018 10 22 7 16 44.320 0.0
42.669964 141.925476 16.595 2018 10 22 8 8 36.400 1.6
42.674305 142.099823 10.284 2018 10 22 8 31 0.670 0.5
42.623543 142.035217 28.838 2018 10 22 10 41 18.370 1.3
42.611668 142.010986 28.573 2018 10 22 12 31 55.770 0.7
42.723648 141.993607 30.041 2018 10 22 16 4 50.560 1.2
42.055737 141.869202 30.623 2018 10 23 0 36 31.550 1.6
42.646446 142.186737 5.303 2018 10 23 0 41 58.410 0.7
42.664707 142.008301 26.261 2018 10 23 2 54 0.550 0.9
42.575394 142.031387 28.744 2018 10 23 5 0 23.360 0.8
42.550568 142.042313 29.088 2018 10 23 6 26 35.150 1.9
42.755039 142.033798 31.657 2018 10 23 6 53 21.270 1.8
42.712784 142.003555 28.190 2018 10 23 10 56 23.460 0.9
42.636215 142.089508 23.965 2018 10 23 14 13 44.760 0.8
42.613705 141.992081 27.652 2018 10 23 14 54 58.110 0.9
42.677540 142.000610 25.705 2018 10 24 0 4 31.390 1.3
42.597015 141.993591 28.585 2018 10 24 2 27 1.630 1.1
42.613739 142.021423 32.796 2018 10 24 4 51 57.500 0.9
42.622597 142.014191 32.185 2018 10 24 4 51 59.770 1.3
42.658478 141.997223 25.674 2018 10 24 5 22 12.520 2.6
42.627289 141.907135 13.974 2018 10 24 6 36 56.770 0.0
42.589493 142.038879 27.601 2018 10 24 9 4 58.000 0.9
42.607960 141.988190 26.855 2018 10 24 15 12 50.860 0.0
42.750446 142.027039 30.277 2018 10 24 19 51 43.240 1.2
42.664108 141.928162 20.776 2018 10 24 23 31 32.560 0.0
42.736397 142.007721 28.525 2018 10 25 2 49 33.560 1.4
42.580677 141.985382 22.088 2018 10 25 2 55 20.550 1.6
42.589886 142.144699 12.134 2018 10 25 6 15 19.810 0.5
42.800537 142.021637 25.942 2018 10 25 6 31 7.320 1.0
42.670105 142.009537 29.970 2018 10 25 7 3 35.550 1.2
42.700195 142.001175 26.850 2018 10 25 8 10 58.260 1.4
42.634602 142.024551 29.747 2018 10 25 10 27 28.520 1.0
42.659863 142.014069 25.454 2018 10 25 14 4 37.450 1.6
42.630638 142.039932 27.819 2018 10 25 17 23 25.400 0.7
42.741764 142.005966 31.076 2018 10 25 18 18 21.060 3.6
42.654591 142.046082 31.142 2018 10 25 18 51 52.740 0.7
42.641457 142.050720 32.651 2018 10 25 21 28 12.680 0.7
42.383884 141.989838 28.497 2018 10 26 1 58 20.640 1.1
42.661716 142.031708 29.587 2018 10 26 5 10 9.310 0.8
42.669605 142.011810 28.486 2018 10 26 11 18 48.300 0.8
42.659992 142.006165 24.522 2018 10 26 15 10 7.470 1.4
42.773819 142.007019 31.067 2018 10 26 18 1 6.380 2.3
42.588058 142.000809 31.438 2018 10 26 19 6 53.260 1.4
42.775730 142.023193 27.412 2018 10 26 20 12 32.760 1.1
42.629261 142.020706 31.059 2018 10 27 0 0 27.750 1.1
42.665619 142.031631 29.117 2018 10 27 0 59 7.900 1.2
42.658543 142.168747 12.704 2018 10 27 3 12 31.000 1.3
42.652584 142.148666 10.399 2018 10 27 15 14 30.730 0.0
42.650002 142.159714 9.995 2018 10 27 15 36 54.270 0.0
42.652233 142.162857 10.311 2018 10 27 18 17 43.240 0.0
42.673088 141.989136 25.714 2018 10 28 7 34 33.500 1.4
42.671257 141.999588 24.309 2018 10 28 14 13 12.590 1.3
42.569752 142.032043 29.420 2018 10 28 17 16 55.800 1.9
42.588600 141.914749 13.041 2018 10 28 21 30 21.980 1.5
42.662285 142.038116 31.193 2018 10 28 21 54 40.280 1.3
42.661716 141.944550 10.702 2018 10 29 0 44 6.590 0.9
42.684498 142.024246 29.746 2018 10 29 0 55 52.100 1.0
42.689457 141.987030 31.925 2018 10 29 1 14 52.230 2.9
42.768627 142.011627 28.088 2018 10 29 2 52 54.100 1.0
42.611683 142.018692 30.033 2018 10 29 14 29 28.580 0.6
42.633392 142.003250 24.709 2018 10 29 16 29 14.050 1.3
42.670219 142.190796 8.451 2018 10 29 17 23 19.680 0.8
42.608234 142.009735 27.693 2018 10 29 22 10 5.960 1.6
42.687038 142.004333 28.903 2018 10 29 22 20 37.040 0.9
42.597431 141.974854 27.609 2018 10 30 1 18 2.350 1.5
42.680107 141.985977 30.027 2018 10 30 3 1 16.140 1.0
42.647564 142.015015 33.174 2018 10 30 11 0 26.680 1.8
42.691380 141.997269 31.459 2018 10 30 13 49 18.780 0.0
42.780170 141.906586 22.301 2018 10 30 14 32 48.080 1.1
42.705959 142.004395 29.022 2018 10 30 22 0 47.220 1.3
43.043865 141.865784 58.172 2018 10 30 22 38 16.740 0.0
42.625221 141.995529 25.563 2018 10 30 22 51 26.560 2.1
42.665443 141.951416 14.635 2018 10 31 4 57 10.840 0.9
42.642277 141.927246 11.246 2018 10 31 6 36 49.900 1.4
42.599297 141.993484 27.667 2018 10 31 8 6 43.910 0.6
42.672642 141.979568 26.959 2018 10 31 13 10 28.130 1.3
42.811035 142.008331 27.968 2018 10 31 14 6 52.370 1.6
42.811722 142.381577 45.767 2018 10 31 14 39 58.010 0.7
42.447361 142.235504 17.718 2018 10 31 23 47 7.440 0.7
